## Diurnal Arabidopsis proteome dynamics

### 1 **Diurnal Dynamics of the Arabidopsis Rosette Proteome and Phosphoproteome**

2 R. Glen Uhrig<sup>1,4,\*</sup>, Sira Echevarría-Zomeño<sup>1,\*</sup>, Pascal Schlapfer<sup>1</sup>, Jonas Grossmann<sup>2</sup>, Bernd  
3 Roschitzki<sup>2</sup>, Niklas Koerber<sup>3</sup>, Fabio Fiorani<sup>3</sup> and Wilhelm Gruissem<sup>1,5#</sup>

4 #Corresponding Author:

5 Dr. Wilhelm Gruissem  
6 Department of Biology  
7 ETH Zurich  
8 Universitätstrasse 2  
9 8092 Zurich  
10 Switzerland  
11 Phone: +41 44 632 08 57  
12 E-Mail: wgruissem@ethz.ch

13 <sup>1</sup> Institute of Molecular Plant Biology, Department of Biology, ETH Zurich, 8092 Zurich,  
14 Switzerland

15 <sup>2</sup> Functional Genomics Center Zurich, University of Zurich, 8057 Zurich, Switzerland

16 <sup>3</sup> Institute of Bio- and Geosciences, IBG-2: Plant Sciences, Forschungszentrum Jülich GmbH,  
17 52425 Jülich, Germany

18 <sup>4</sup> Department of Biological Sciences, University of Alberta, Edmonton, Alberta, Canada

19 <sup>5</sup> Institute of Biotechnology, National Chung Hsing University, Taichung 40227, Taiwan

20  
21 \* denotes equal contribution and should be considered joint first authors.  
22  
23

24 **Key Words:** *Arabidopsis thaliana*, diurnal cycle, proteome, phosphoproteome, quantitative  
25 proteomics  
26  
27

28 **Running Head:** Diurnal Arabidopsis proteome dynamics  
29

30 **Funding:** This work was funded by TiMet - Linking the Clock to Metabolism (Grant Agreement  
31 245143) supported by the European Commission (FP7-KBBE-2009-3). Experiments conducted at  
32 Forschungszentrum Jülich were partly funded by the Helmholtz Association.  
33

34 **Summary Statement:** The manuscript provides quantitative information of diurnal changes in the  
35 accumulation and phosphorylation of proteins in *Arabidopsis thaliana* rosettes grown in a 12 h  
36 photoperiod. The highly resolved time-scale of the datasets offer new proteome-level insights for  
37 future targeted studies.

## Diurnal Arabidopsis proteome dynamics

### 38 **ABSTRACT**

39 Plant growth depends on the diurnal regulation of cellular processes, but it is not well  
40 understood if and how transcriptional regulation controls diurnal fluctuations at the protein-level.  
41 Here we report a high-resolution *Arabidopsis thaliana* (Arabidopsis) leaf rosette proteome  
42 acquired over a 12 h light : 12 h dark diurnal cycle and the phosphoproteome immediately before  
43 and after the light-to-dark and dark-to-light transitions. We quantified nearly 5000 proteins and  
44 800 phosphoproteins, of which 288 fluctuated in their abundance and 226 fluctuated in their  
45 phosphorylation status. Of the phosphoproteins, 60% were quantified for changes in protein  
46 abundance. This revealed six proteins involved in nitrogen and hormone metabolism that had  
47 concurrent changes in both protein abundance and phosphorylation status. The diurnal proteome  
48 and phosphoproteome changes involve proteins in key cellular processes, including protein  
49 translation, light perception, photosynthesis, metabolism and transport. The phosphoproteome at  
50 the light-dark transitions revealed the dynamics at phosphorylation sites in either anticipation of  
51 or response to a change in light regime. Phosphorylation site motif analyses implicate casein kinase  
52 II and calcium/calmodulin dependent kinases among the primary light-dark transition kinases. The  
53 comparative analysis of the diurnal proteome and diurnal and circadian transcriptome established  
54 how mRNA and protein accumulation intersect in leaves during the diurnal cycle of the plant.

## Diurnal Arabidopsis proteome dynamics

### 55 INTRODUCTION

56 Plant growth and biomass production are direct functions of the diurnal cellular carbon  
57 balance, which is regulated by a combination of light responses and the circadian clock. Light  
58 responses are triggered by a change in regime (i.e., presence or absence of light), while the  
59 circadian clock is comprised of transcriptional regulators that operate in anticipation of a change  
60 (e.g. transition from light to dark) and whose activities span the 24 hour (h) photoperiod (Nohales  
61 & Kay, 2016; Oakenfull & Davis, 2017; Seluzicki, Burko, & Chory, 2017). The core clock  
62 transcriptional regulators include CCA1/LHY, PRR5, PRR7 and PRR9, which form the morning  
63 loop, and TOC1, ELF3, ELF4 and LUX, which form the evening loop (Flis et al., 2015; Staiger,  
64 Shin, Johansson, & Davis, 2013). More than 30% of all Arabidopsis genes are regulated by the  
65 circadian clock at the transcript level (Blasing et al., 2005; Covington, Maloof, Straume, Kay, &  
66 Harmer, 2008). However, less is known about how the resulting diurnal transcriptome relates to  
67 protein abundance (Abraham et al., 2016; Choudhary, Nomura, Wang, Nakagami, & Somers,  
68 2015; Graf et al., 2017) and post-translational protein modifications (Choudhary et al., 2015;  
69 Uhrig, Schlapfer, Roschitzki, Hirsch-Hoffmann, & Gruissem, 2019), both of which may also affect  
70 protein function at light-dark transitions and throughout the diurnal cycle. Transcript and protein  
71 abundance changes are often disconnected because changes in transcript levels show no  
72 corresponding change in protein abundance (Baerenfaller et al., 2012; Seaton et al., 2018). For  
73 example, this disconnect was found in the circadian clock mutants CCA1/LHY, PRR7/PRR9,  
74 TOC1 and GI (Graf et al., 2017) and for the variability in the timing of peak transcript and protein  
75 levels (translational coincidence) as a function of the photoperiod-dependent coordination between  
76 transcriptome and proteome changes (Seaton et al., 2018). Variable delays between peak transcript  
77 and protein abundance have implicated post-transcriptional regulation (e.g. splicing), translational  
78 regulation (e.g. translation rate) as well as post-translational regulation (e.g. protein  
79 phosphorylation) as possible mechanisms to explain the temporal differences in RNA and protein  
80 abundance. More recent studies of plant protein-level regulation have also found extensive  
81 variability in protein turnover (Li et al., 2017; Seaton et al., 2018), which adds further regulatory  
82 complexity because conventional quantitative proteome workflows cannot easily account for  
83 protein turnover. Although transcript and protein synthesis, stability and turnover all contribute to  
84 the coordination of transcript and protein abundance, how these mechanisms are integrated is  
85 currently not well understood. Insights into this regulatory complexity requires protein-level time-

## Diurnal Arabidopsis proteome dynamics

86 course experimentation and, in particular, an understanding of protein post-translational  
87 modifications (PTMs). To address this, we undertook a large-scale quantitative proteomics  
88 approach to determine the extent of diurnal protein abundance and/or phosphorylation changes in  
89 Arabidopsis rosette proteins over a 24h photoperiod.

90 Reversible protein phosphorylation is the most abundant PTM in eukaryotes (Adam &  
91 Hunter, 2018; Rao, Thelen, & Miernyk, 2014). In non-photosynthetic eukaryotes phosphorylation  
92 is found to modulate more than 70% of all cellular processes (Olsen et al., 2006), including the  
93 circadian clock itself (Robles, Humphrey, & Mann, 2017). The extent of regulatory protein  
94 phosphorylation events is likely similar in land plants as they have significantly larger kinomes  
95 (Lehti-Shiu & Shiu, 2012; Zulawski, Schulze, Braginets, Hartmann & Schulze, 2014) compared  
96 to humans, which encode 518 protein kinases (Manning, Whyte, Martinez, Hunter, & Sudarsanam,  
97 2002). Conversely, both plants and humans have an equally comparable number of protein  
98 phosphatases (Kerk, Templeton, & Moorhead, 2008). However, most protein phosphatases require  
99 association with regulatory subunits to achieve their specificity (Moorhead et al., 2008; Uhrig,  
100 Labandera, & Moorhead, 2013), suggesting similar complexity in how plants manage protein  
101 dephosphorylation through a likely expansion of protein phosphatase regulatory subunits.

102 In plants, diurnal protein phosphorylation is regulated either in response to light, by the  
103 circadian clock (Choudhary et al., 2015), or both (Uhrig et al., 2019), while the clock itself is  
104 regulated by phosphorylation (Kusakina & Dodd, 2012; Uehara et al., 2019). Recent studies of the  
105 circadian phosphoproteome combining the analysis of a free-running cycle and the circadian clock  
106 mutants *elf4* (Choudhary et al., 2015) or CCA1-OX over-expression (Krahmer et al., 2019) have  
107 revealed temporally modified phosphorylation sites related to casein kinase II (CKII) and sucrose  
108 non-fermenting kinase 1 (SnRK1). SnRKs are likely involved in the regulation of the circadian  
109 phosphoproteome because the transcription of genes encoding multiple SnRK and calcineurin B-  
110 like (CBL) interacting kinases (CIPK) was mis-regulated in the Arabidopsis circadian clock  
111 mutants *cca1/lhy1*, *prp7prp9*, *toc1* and *gi201* mutants at end-of-day (ED) and end-of-night (EN)  
112 (Graf et al., 2017). Similarly, studies quantifying changes in the phosphoproteome at ED and EN  
113 in Arabidopsis rosette leaves, roots, flowers, siliques and seedlings have revealed a large number  
114 of diurnally changing phosphorylation events corresponding to diverse protein kinase motifs  
115 (Reiland et al., 2009; Uhrig et al., 2019).

## Diurnal Arabidopsis proteome dynamics

116           Considering the marked physiological and metabolic changes occurring at the light-dark  
117 (L-D) and dark-light (D-L) transitions (Annunziata et al., 2018; Gibon et al., 2009; Usadel et al.,  
118 2008), we performed a quantitative phosphoproteome analysis of proteins that are phosphorylated  
119 immediately before and after the L-D and D-L transitions during a 12 h light : 12 h dark  
120 photoperiod and asked how these phosphorylation events intersect with changes in protein  
121 abundance. Together, our systems-level quantitative analysis of the Arabidopsis thaliana rosette  
122 proteome and phosphoproteome over a 24h photoperiod provides new insights into diurnal protein  
123 and phosphorylation regulation.

124

## 125 **MATERIALS AND METHODS**

126           Arabidopsis Col-0 wild-type plants were grown at the Forschungszentrum Jülich  
127 (Germany) in an environmentally controlled chamber (GrowScreen Chamber;  
128 [https://eppn2020.plant-phenotyping.eu/EPPN2020\\_installations#/tool/30](https://eppn2020.plant-phenotyping.eu/EPPN2020_installations#/tool/30); Barboza-Barquero et  
129 al., 2015) under a 12 h light:12 h dark photoperiod and controlled conditions as described in  
130 Baerenfaller *et al.* (2012), including air temperature of 21°C during the day and 20°C during the  
131 night, air humidity of 70%, and an incident light intensity of ~220 mmol/m<sup>2</sup>/s at the plant level.  
132 Whole rosettes were harvested at 31 days after sowing (DAS) prior to flowering. Four whole  
133 rosettes were pooled into one sample and 4 biological replicates were collected at each time point  
134 except for ZT1, 3, 5 9 and 23, which had only 3 biological replicas for proteome analysis and  
135 AL\_10, which had only 3 replicas for phosphoproteome analysis. For total proteome analyses,  
136 samples were taken every 2 h during 24 h, starting at Zeitgeber time 1 (ZT1, i.e. 1 h after lights  
137 turned on). For protein phosphorylation analyses, samples were 30 min before, 10 min after and  
138 30 min after the L-D and D-L transitions. Samples were snap-frozen in liquid N<sub>2</sub> and stored at -  
139 80°C until protein extraction.

140

### 141 ***Proteome Analysis***

142           *Extraction and digestion* - Samples were randomized before processing to avoid batch  
143 effects. Frozen rosettes were ground under liquid N<sub>2</sub>. Proteins were extracted from 100 mg of  
144 frozen powder per sample by adding 150 µl of extraction buffer (30 mM Tris-HCl pH 8.0,  
145 4% SDS). Tubes were incubated in a shaker (Eppendorf) at 4°C at 1400 rpm for 30 min. Samples  
146 were centrifuged at 16000 g and 4°C for 30 min and the supernatant was transferred to a new tube.

## Diurnal Arabidopsis proteome dynamics

147 Protein concentration was estimated based on Bradford (Bradford, 1976) using the Bio-Rad  
148 Protein Assay reagent. Subsequently, DTT was added to a final concentration of 50 mM and  
149 proteins were reduced for 30 min on ice. For digestion, 140 µg of proteins were processed  
150 following the FASP method (Wisniewski, Zougman, Nagaraj, & Mann, 2009). Peptides were  
151 desalted using SPE C18 columns (Finisterre) and dried down in a SpeedVac concentrator.

152 *Peptide fractionation* - To increase proteome coverage, peptide samples were fractionated  
153 by hydrophilic interaction chromatography (HILIC) on an Agilent 1200 series HPLC system with  
154 a YMC-Pack Polyamine II 250 x 3.0 mm size column with 5 µm particle size and 120 Å pore size.  
155 Samples were dissolved in 100 µl Buffer A (75% ACN, 8 mM KH<sub>2</sub>PO<sub>4</sub>, pH 4.5) and separated  
156 with Buffer B (5% ACN, 100 mM KH<sub>2</sub>PO<sub>4</sub>, pH 4.5) at a flow rate of 500 µl/min with the following  
157 gradient: 0-7.5 min, 0% B; 7.5-37.5 min, 0-50% B; 37.5-42.5 min, 50-100% B; 42.5-47.5 min,  
158 100% B. Following the separation the column was washed with 100% buffer A and re-equilibrated  
159 for 60 min. For each sample, the 27 automatically collected fractions were pooled into five  
160 fractions that were subsequently dried down in a SpeedVac concentrator. Each sample was then  
161 dissolved in 200 µl of 3% ACN, 0.1% TFA, desalted on SPE C18 columns (Finisterre) and again  
162 dried in a SpeedVac concentrator.

163 *LC-MS analysis* - Mass spectrometry queues were arranged to process comparable  
164 fractions in the same batch, with sample order randomized within each batch. Peptide samples  
165 were dissolved in 20 µl 3% ACN, 0.1% FA and spiked with internal retention time (iRT) standards  
166 (Biognosys) for chromatography quality control. LC-MS/MS shotgun analyses were performed on  
167 a Thermo Orbitrap Fusion instrument coupled to an Eksigent NanoLC Ultra (Sciex). Samples were  
168 separated on a self-packed reverse-phase column (75 µm x 150 mm) with C18 material (ReproSil-  
169 Pur, C18, 120 Å, AQ, 1.9 µm, Dr. Maisch GmbH). The column was equilibrated with  
170 100% solvent A (0.1% FA in water). Peptides were eluted using the following gradient of  
171 solvent B (0.1% FA in ACN) at a flow rate of 0.3 µl/min: 0-50 min: 3-25% B, 50-60 min:  
172 25-35% B, 60-70 min: 35-97% B, 70-80 min: 97% B, 80-85 min: 2% B. Mass spectra were  
173 acquired in a data-dependent manner. All precursor signals were recorded in the Orbitrap using  
174 quadrupole transmission in the mass range of 300-1500 m/z. Spectra were recorded with a  
175 resolution of 120000 (FWHM) at 200 m/z, a target value of 4e5 and the maximum cycle time set  
176 to 3 s. Data dependent MS/MS were recorded in the linear ion trap using quadrupole isolation with  
177 a window of 1.6 Da and higher-energy collisional dissociation (HCD) fragmentation with

## Diurnal Arabidopsis proteome dynamics

178 30% fragmentation energy. The ion trap was operated in rapid scan mode with a target value of  
179 1E4 and a maximum injection time of 250 ms. Precursor signals were selected for fragmentation  
180 with a charge state from + 2 to + 7 and a signal intensity of at least 5e3. A dynamic exclusion list  
181 was used for 30 s and maximum parallelizing ion injections was activated. The mass spectrometry  
182 proteomics data were handled using the local laboratory information management system (LIMS)  
183 (Türker et al., 2010)

184

### 185 ***Phosphoproteome Analysis***

186 *Extraction* – Whole rosette tissue from each time point was harvested and ground under  
187 liquid N<sub>2</sub>. From each biological replicate 200 mg of ground leaf material was weighed out under  
188 liquid N<sub>2</sub>. In addition to each biological replicate, 200 mg of samples containing equal weighted  
189 parts of each biological replicate and time-point were created as a reference sample (gold-standard)  
190 for downstream dimethyl labeling. All proteins were extracted in a 250 µl solution of 50 mM  
191 HEPES pH 8.0, 6 M urea, 2 M thiourea, 100 mM NaCl, 10 mM EDTA, 2 mM NaOV, 5 mM NaF,  
192 50 µg/mL PhosSTOP (Roche). Samples were shaken at room temperature for 30 min at 1000 g  
193 with vortexing every 10 min. Extracts were then brought to pH 8.0 using triethylammonium  
194 bicarbonate (TEAB). Protein extracts were then reduced for 30 min with 10 mM DTT, followed  
195 by alkylation with 30 mM iodoacetamide for 1 h. Extracts were clarified to separate soluble and  
196 insoluble fractions. The insoluble fraction was re-suspended in 300 µL 60:40 buffer containing  
197 60% MeOH: 40% 50 mM TEAB pH 8.0 followed by shaking at 1000 rpm (Eppendorf tabletop)  
198 for 2.5 h. The protein concentration of the soluble fraction was then measured using the Bradford  
199 protein assay (Bradford, 1976). An amount of 1 mg of soluble protein from each sample was then  
200 diluted with 1 vol. of 50 mM TEAB and then water was added to a total volume of 1.2 ml and a  
201 final urea/thiourea concentration of 1.2 M. The soluble fraction was then digested for 20 h at 37°C  
202 using a 1:50 ratio of trypsin (Promega) to extracted protein while gently shaking. Each insoluble  
203 fraction was digested by 0.5 µg chymotrypsin and 1 µg trypsin at 37°C for 20 h shaking at 600  
204 rpm (Eppendorf tabletop). Digestion reactions were stopped using TFA to a final concentration of  
205 0.5%. The insoluble fractions were centrifuged for 10 min at 20000 g at room temperature and the  
206 supernatant removed. The supernatant was then dried and re-suspended in desalting buffer  
207 comprised of 3% ACN / 0.1% TFA. The soluble fraction and the supernatant from the insoluble  
208 fraction were desalted using SPE C18 columns (Finissterre) and dried in a SpeedVac concentrator.

## Diurnal Arabidopsis proteome dynamics

209 *Dimethyl labeling and phosphopeptide enrichment* - Total peptide fractions from each  
210 experimental (light label) and gold-standard (heavy label) sample were labeled according to  
211 Boersema *et al.*, (Boersema, Raijmakers, Lemeer, Mohammed, & Heck, 2009). Heavy and light  
212 samples were then mixed 1:1 and desalted prior to phosphopeptide enrichment using TiO<sub>2</sub>.  
213 Phosphopeptide enrichment was performed using TiO<sub>2</sub> heavy and light dimethyl-labelled  
214 phosphopeptides as previously described (Zhou *et al.*, 2011).

215 *LC-MS* - Phosphorylated peptide samples were analyzed using a Q Exactive Orbitrap mass  
216 spectrometer (Thermo Scientific). Dissolved samples were injected using an Easy-nLC 1000  
217 system (Thermo Scientific) and separated on a self-made reverse-phase column (75 µm x 150 mm)  
218 packed with C18 material (ReproSil-Pur, C18, 120 Å, AQ, 1.9 µm, Dr. Maisch GmbH). The  
219 column was equilibrated with 100% solvent A (0.1% formic acid (FA) in water). Peptides were  
220 eluted using the following gradient of solvent B (0.1% FA in ACN): 0-120 min, 0-35% B, 120-  
221 122 min, 35-95% B at a flow rate of 0.3 µl/min. High accuracy mass spectra were acquired in data-  
222 depended acquisition mode. All precursor signals were recorded in a mass range of 300-1700 m/z  
223 and a resolution of 70000 at 200 m/z. The maximum accumulation time for a target value of 3e6  
224 was set to 120 ms. Up to 12 data dependent MS/MS were recorded using quadrupole isolation with  
225 a window of 2 Da and HCD fragmentation with 28% fragmentation energy. A target value of 1e6  
226 was set for MS/MS using a maximum injection time of 250 ms and a resolution of 70000 at  
227 200 m/z. Precursor signals were selected for fragmentation with charge states from +2 to +7 and a  
228 signal intensity of at least 1e5. All precursor signals selected for MS/MS were dynamically  
229 excluded for 30 s.

230

### 231 ***Quantitative analysis and bioinformatics***

232 *Total proteome* - Label-free precursor (MS1) intensity based quantification was performed  
233 using Progenesis QI for Proteomics (version 2.1, [www.nonlinear.com](http://www.nonlinear.com)) to quantify total proteome  
234 changes. Briefly, for each individual fraction, automatic alignment was reviewed and manually  
235 adjusted before normalization. From each Progenesis peptide ion (default sensitivity in peak  
236 picking) a maximum of the top five tandem mass spectra per peptide ion were exported as a Mascot  
237 generic file (\*.mgf) using charge deconvolution and deisotoping option and a maximum number  
238 of 200 peaks per MS/MS. Searches were done in Mascot 2.4.1 (Matrix Science) against a decoyed  
239 (reversed) Arabidopsis protein database from TAIR (release TAIR10) concatenated with a



## Diurnal Arabidopsis proteome dynamics

240 collection of 261 known mass spectrometry contaminants. Precursor ion mass tolerance was set to  
241 10 ppm and the fragment ion mass tolerance was set to 0.6 Da. The following search parameters  
242 were used: trypsin digestion (1 missed cleavage allowed), fixed modifications of carbamidomethyl  
243 modified cysteine and variable modifications of oxidation of methionine, deamidation of  
244 asparagine and glutamine, and acetylation of protein N terminal peptides. Mascot searches were  
245 imported into Scaffold 4.2.1 (Proteome Software). The following thresholds were applied: peptide  
246  $FDR \leq 5$ , protein  $FDR \leq 10$ , 1 minimum peptide. Spectrum reports were imported again into  
247 Progenesis. After this, individual fraction analyses were combined into the full quantitative  
248 Progenesis experiment. From this, quantitative peptide values were exported for further  
249 processing. Only peptides that could be unambiguously assigned to a single protein (gene model  
250 annotation) were kept for quantification. A Hi-4 strategy (Grossmann et al., 2010) was applied to  
251 obtain protein quantitative values. Proteins with 2 or more peptides assigned were considered as  
252 quantifiable. Following these criteria, the final protein level FDR was estimated at 0.013.

253 *Phosphoproteome* - Quantification of changes in identified phosphopeptides was  
254 performed using MaxQuant (version 1.3.0.5) with default settings and the following modifications:  
255 fixed peptide modification by carbamidomethylation of cysteines and variable peptide  
256 modifications by phosphorylation of serine, threonine and tyrosine, and oxidation of methionine,  
257 and false discovery rate (FDR) tolerances of  $\leq 0.05$  (protein) and  $\leq 0.01$  (peptide). MaxQuant  
258 outputs were subsequently filtered for phosphopeptides with a phosphorylation site probability  
259 score  $\geq 0.8$  and presence in at least 2 of 3 (AL\_10) or 2 of 4 biological replicates and 2 of 3  
260 time-points for each light transition.

261 *Data Analysis* - Significant fluctuations in protein abundance and phosphopeptides were  
262 determined using an ANOVA analysis: total proteome (P value  $\leq 0.05$  and Fold-change  
263 (FC)  $\geq 1.5$ ) and phosphoproteome (P value  $\leq 0.05$ ). The significantly changing proteome was  
264 subjected to cluster analysis using GProX (Rigbolt, Vanselow, & Blagoev, 2011). Six clusters  
265 were generated in an unsupervised clustering manner based on the fuzzy c-means algorithm.  
266 Significantly changing proteins and phosphoproteins were subjected to gene set enrichment  
267 analysis (GSEA) using the SetRank algorithm relative to the identified proteome and  
268 phosphoproteome, respectively (Simillion, Liechti, Lischer, Ioannidis, & Bruggmann, 2017).  
269 Enrichment was calculated for all the available databases included in the SetRank R package. Only  
270 terms with a size  $\geq 2$  were considered (gene set size  $\geq 2$ ). For each protein cluster, a SetRank

## Diurnal Arabidopsis proteome dynamics

271 corrected P value  $\leq 0.01$  was applied as threshold. For phosphoproteins changing at the L-D or D-  
272 L transition, a SetRank corrected P value  $\leq 0.01$  and an FDR  $\leq 0.05$  were applied. To test for  
273 significantly non-changing proteins at the transitions to light, (i.e., at dawn, ZT23 to ZT1, and  
274 dusk, ZT11 to ZT13), a TOST equivalence test (equivalence R package) was applied with an  
275  $\epsilon = 0.4$ . Significance threshold was P value  $\leq 0.05$ . The mass spectrometry proteomics data have  
276 been deposited to the ProteomeXchange Consortium via the PRIDE partner repository. Data are  
277 available via ProteomeXchange with identifier PXD007600.

278 *Additional Analyses* - To compare protein and mRNA profiles, mRNA data generated by  
279 the Alison Smith laboratory was obtained from the Diurnal database  
280 (<http://diurnal.mocklerlab.org>; Mockler et al., 2007). For this, we restricted the analysis to the  
281 information from LDHH\_SM and LDHH\_ST. Data was standardized to plot both protein and  
282 mRNA data in the same graph. Predicted subcellular localization of all changing proteins and  
283 phosphoproteins was performed using the consensus subcellular localization predictor SUBAcon  
284 ([suba3.plantenergy.uwa.edu.au](http://suba3.plantenergy.uwa.edu.au)) (Tanz et al., 2013). String DB network analyses were undertaken  
285 using both proteome and phosphoproteome data. String DB analyses were performed in Cytoscape  
286 using the String DB plugin stringApp (Szklarczyk et al., 2017). A minimum correlation coefficient  
287 of 0.5 was used along with a second layer of 5 additional nodes to anchor each network to better  
288 infer network connectedness.

289 *JTK Analyses* – To compare diurnal protein fluctuations to free running circadian clock  
290 fluctuations published by Kraemer et al. (2019; dataset PXD009230 available at  
291 ProteomeXchange) we performed an equivalent analysis using the JTK cycle to identify proteins  
292 cycling with 22 or 24 h period (Hughes, Hogenesch, & Kornacker, 2010). The exact loading script  
293 JTK\_analysis.zip is available upon request. JTK\_cycle fits data of many entities (here protein  
294 abundances) to a cosine function model, and estimates a P value for the accuracy of the model for  
295 every protein permutation of the dataset (resulting in the ADJ.P values). Further it applies a  
296 Benjamini Hochberg correction for multiple testing resulting in q-values (resulting in the BH.Q  
297 values). The data was then used to produce Figure 3B, C and D. Proteins identified to fluctuate  
298 were normalized such that they fluctuate around a median of 0 with maximal amplitudes of 2.  
299 Transcriptome data from Diurnal DB (<http://diurnal.mocklerlab.org>; Mockler et al., 2007) was  
300 used to determine if the associated transcripts were also fluctuating, and if so, when. For this, we  
301 restricted the analysis to the information from LDHH\_SM and LDHH\_ST. To estimate a

## Diurnal Arabidopsis proteome dynamics

302 confidence interval for the relative expression or protein level errors, their relative levels were  
303 compared to the theoretical cosine function at the same timepoint. Based on all errors, irrespective  
304 of the exact timepoint, a 99% confidence interval was computed.

305

## 306 **RESULTS AND DISCUSSION**

### 307 **Dynamics of the Arabidopsis diurnal proteome and phosphoproteome**

308 Using proteotypic peptides, we performed a label-free quantitative proteomics analysis of  
309 the diurnal proteome. Here, we identified 7060 unique proteins, of which we were able to quantify  
310 4762 proteins with two and more proteotypic peptides over the 24h time-course (Supplemental  
311 Figure 1; Table 1; Supplemental Table 1). Statistical analysis showed that 288 of these proteins  
312 were significantly changing in abundance (ANOVA P value  $\leq 0.05$ , FC  $> 1.5$ ); Table 1;  
313 Supplemental Table 2), suggesting that a portion (~6%) of the quantified proteome is dynamically  
314 regulated over the course of a day. Additionally, using a dimethyl-labeling approach, we identified  
315 a total of 2298 phosphopeptides (Supplemental Figure 1; Supplemental Table 3), of which 1776  
316 had a phosphorylation site probability score  $\geq 0.8$ . We were able to quantify 1056 of these  
317 phosphopeptides (present in at least 2 biological replicates and in 3 out of 3 time points for each  
318 transition; Table 1), which corresponded to a total of 1803 identified phosphorylation sites. Of  
319 these, 253 (14%) represented newly identified phosphorylation sites when compared to the  
320 compendium of 79,334 known phosphorylation sites (PhosPhat 4.0; Heazlewood et al., 2008) and  
321 a total of 271 phosphopeptides on 226 proteins (~26% of all quantified phosphopeptides)  
322 significantly changed in abundance (ANOVA P value  $\leq 0.05$ ) at either the D-L, L-D or both  
323 transitions (Table 1; Supplemental Table 4).

324

### 325 **Most proteins with diurnal changes in abundance fluctuate independently of their transcript** 326 **levels and belong to specific functional networks**

327 To clarify which cellular and physiological processes possess protein abundance dynamics,  
328 we grouped all significantly changing proteins with similar accumulation profiles into clusters and  
329 then subjected these clusters to gene set enrichment analysis (GSEA). Not all clusters exhibited  
330 classic cosine dynamics, but instead exhibited complex profiles at specific times of day. Each of  
331 the resulting six clusters (CL1 – CL6) is enriched for proteins involved in specific processes  
332 (P value  $\leq 0.01$ , gene set size  $\geq 2$ ) (Figure 1A-B; Supplemental Data 1 - 6). Cluster CL1 is enriched

## Diurnal Arabidopsis proteome dynamics

333 in proteins involved in RNA splicing that decrease before dawn, while CL2 is enriched in proteins  
334 that peak early in the light period and have roles in nitrogen metabolism, iron homeostasis,  
335 responses to gravity and chloroplast stroma protein import. CL5 contains proteins with peak  
336 abundance before dawn and lower abundance before dusk that have specific functions in aerobic  
337 respiration and proteasome complex formation, while proteins in CL3 have functions in  
338 membrane-related processes and ribosome biogenesis. The CL3 abundance profile is complex with  
339 a sharp minimum during the second half of the light period that is also found at the transcript level  
340 for selected proteins in this group. Cluster CL4 shows increasing levels during the first hours of  
341 the day, followed by a reduction until the end of the day, while levels are stable during night. CL4  
342 is enriched for proteins involved in nitrogen metabolism and photosynthesis, which are required  
343 for light-dependent carbon assimilation to support growth. CL6 exhibits a similar pattern as CL4,  
344 but seems to be shifted by 4 to 6 hours so that the peak protein levels peak at dusk. CL6 is enriched  
345 for proteins involved in metabolic and RNA-related processes that indicate a systemic change in  
346 the plant cell environment.

347 We then compared the proteins in CL1 to CL6 with their corresponding transcript  
348 expression profiles using transcriptome data generated from whole Arabidopsis rosettes grown and  
349 harvested in comparable conditions and at similar time-points (Figure 1C). This revealed that the  
350 dynamics of CL1 to CL6 protein changes are not strictly correlated with the diurnal abundance  
351 changes of their transcripts (Figure 1C; Supplemental Data 1-6), as has been found in multiple  
352 other studies (Baerenfaller et al., 2012; Abraham et al., 2016; Graf et al., 2017; Seaton et al., 2018).  
353 We then determined the subcellular compartmentalization of proteins in each cluster using the  
354 consensus localization predictor SUBAcon (SUBA3; <http://suba3.plantenergy.uwa.edu.au>; Figure  
355 1D) (Tanz et al., 2013). Most clusters exhibited a similar distribution of localizations with the  
356 exception of CL4, which had an expanded complement of cytosolic and plasma membrane proteins  
357 coupled with a decrease in plastid-targeted proteins.

358 To determine connections between proteins with changing abundances, we next built  
359 functional association networks for each cluster using STRING-DB (<http://string-db.org>; Figure  
360 2). STRING-DB scoring and Cytoscape visualization allowed us to estimate association  
361 confidence between protein nodes, while subcellular localization information resolved co-  
362 localized nodes. Second level nodes not found in our data were also included to anchor the network  
363 and help depict broader relationships between the significantly changing proteins. Although such

## Diurnal Arabidopsis proteome dynamics

364 anchoring nodes do not change themselves, abundance changes of their interaction partners may  
365 impact the behavior of these nodes. This analysis strategy resolved multiple protein hubs within  
366 each cluster that have variable degrees of interconnectedness to the depicted biological processes,  
367 with some processes complementing those enriched by GSEA (Figure 1B). Proteins with no  
368 known connections above the set association threshold were removed from the network. Using our  
369 STRING-DB analysis approach we defined network structures for proteins belonging to: RNA  
370 splicing (CL1) and processing (CL6; RNA helicases and binding proteins), chloroplast-related  
371 processes (CL4 and 5, light detection; CL1 and CL5, carbohydrate/starch metabolism; CL2, redox  
372 regulation), cell metabolism (CL4, nitrogen and fatty acid metabolism), secretion and intracellular  
373 transport (CL2), cell wall biosynthesis (CL5) as well as cytosolic (CL1, 3 and 5), mitochondrial  
374 (CL3) and plastidial (CL4 and 5) protein translation (Figure 2). Taken together, our GSEA and  
375 association network analyses provide new process- and protein-level information for when (time  
376 of day), where (subcellular compartment) and how (cellular processes) plants operate over a 24h  
377 photoperiod. This data is essential for a more precise understanding of molecular plant cell  
378 regulation.

379

### 380 **The influence of the circadian clock on diurnal fluctuations of proteins is limited.**

381 To determine if the significant changes we measured in the diurnal proteome could be  
382 controlled by the circadian clock, we next compared our data to a quantitative proteomics dataset  
383 acquired under free-running (continuous light) conditions (Krahmer et al., 2019). Our dataset of  
384 4762 quantified proteins contains 1800 of the 2038 proteins (88%) reported by Krahmer et al.  
385 (2019), allowing us to directly compare proteome results between studies (Supplemental Data 7).  
386 To avoid identification of differences based on the fact that the quantitative proteome analysis  
387 described above and the JTK\_cycle analysis used by Krahmer et al. (2019) differ in their methods,  
388 we also performed a JTK\_cycle analysis to identify proteins cycling with a 22 or 24 h period  
389 (Hughes et al., 2010). Unlike our previous analysis of diurnal proteome fluctuations, which  
390 identified 288 significantly changing proteins regardless of cycling preconditions, the JTK\_cycle  
391 analysis approach aims to elucidate proteins exhibiting diurnal fluctuations in the form of a cosine  
392 function, and correspondingly evaluates how well these changes in abundance fit with this  
393 expected cosine behavior. JTK\_cycle analysis estimates goodness of fit based on shuffling of  
394 protein values leading to a P value. It then uses a Benjamini Hochberg correction to correct for

## Diurnal Arabidopsis proteome dynamics

395 multiple testing. In accordance with the analysis approach of Krahmer et al. (2019), we identified  
396 a total of 147 fluctuating proteins prior to multiple testing correction, which is comparable to the  
397 211 found to fluctuate under continuous light conditions by Krahmer et al. (2019). Upon correcting  
398 for multiple testing, our JTK\_cycle analysis revealed a total of 21 proteins to exhibit a significant  
399 fluctuation in abundance, of which 3 demonstrated a similar pattern under continuous light  
400 conditions (Figure 3A). Using the statistically relevant proteins only, our study and Krahmer et al.  
401 (2019) find 3 proteins to fluctuate in both studies, one only in L-D conditions and 7 only in  
402 continuous light. The fact that of these 11 proteins only 10 have significant JTK-cycle fluctuations  
403 in continuous light (i.e., free-running condition), suggests that they are under circadian control,  
404 although additional proteome analysis of normal photoperiods prior to free-running conditions is  
405 needed to substantiate this possibility. Here, we find alpha-crystallin domain 32.1 (ACD32.1;  
406 AT1G06460) to fluctuate at the protein-level independent of the circadian clock. ACD32.1 was  
407 previously shown to be regulated diurnally at the transcript level in continuous light (Covington et  
408 al., 2008), but it did not fluctuate in the proteome data of Krahmer et al., 2019. ACD32.1 is a  
409 peroxisome-targeted chaperone protein (Pan et al., 2018) implicated in the suppression of protein  
410 aggregation (Ma, Haslbeck, Babujee, Jahn, & Reumann, 2006). We find ACD32.1 to peak in  
411 abundance immediately after dark, suggesting a potential need for peroxisomal protein stability in  
412 the dark to maintain peroxisome functions required for plant growth, including fatty acid oxidation  
413 (Pan et al., 2018).

414         Given that the expression of many genes fluctuate at the transcript level, it is unexpected  
415 that such a low number of proteins exhibit rhythmic changes in protein abundance. For example,  
416 of the 22641 diurnal gene expression profiles stored in the Diurnal Database v2.0  
417 (<http://diurnal.mocklerlab.org/>), 40.6% (9197) showed fluctuating transcripts in conditions that are  
418 comparable to ours (see Materials and Methods). Of our 4762 quantified proteins, gene expression  
419 profiles for 4468 were also present in the Diurnal Database and 2253 showed fluctuating transcript  
420 levels. Of our 4762 proteins we detected and quantified during the diurnal cycle, gene expression  
421 profiles for 4468 proteins were also found in the Diurnal Database and the transcripts for 2253 of  
422 these proteins had oscillating accumulation pattern. Of these oscillating transcripts, only 6.2%  
423 (140) had proteins that also showed peaks in abundance. For the remaining 2215 transcripts that  
424 did not oscillate, 4.0% (88) still had proteins with peaks in their abundance, indicating that there  
425 is no stringent relationship between transcript oscillation and protein peak abundance.

## Diurnal Arabidopsis proteome dynamics

426 To see if the fluctuating proteins that we did find are potentially explained by fluctuating  
427 transcripts, we searched the Diurnal Database for the genes encoding the 21 proteins showing a  
428 significant JTK\_cycle change in protein abundance (Figure 3A, magenta and blue) and found 18  
429 of the genes. Of these 18, 15 were identified to possess diurnal changes in transcript abundance.  
430 For these 15 transcript-protein pairs, neither the protein nor the corresponding transcript levels  
431 were peaking at a specific Zeitgeber time (Figure 3B) and thus, these genes are likely regulated  
432 independently of each other. However, when comparing the patterns of individual pairs,  
433 normalizing for the transcript peak time, there was typically a median delay of 5.5 h between the  
434 peak transcript and peak protein (Figures 3C and D). Since such a shifted dependency of transcript  
435 and protein expression pattern is rare in our proteome dataset, its biological significance needs to  
436 be investigated further.

437 Together, while our diurnal proteome analysis revealed 288 proteins in different clusters  
438 that change in their abundance at different time intervals during the diurnal cycle, proteins for  
439 which their abundance changes follow a cosine function seem to be few when measured across the  
440 whole Arabidopsis rosette. The identification of only a single highly significant JTK-cycling  
441 protein in our diurnal proteome dataset is unexpected, but it is consistent with the limited  
442 fluctuations of proteins reported for measured proteomes of Arabidopsis wild-type and circadian  
443 clock mutants growing in free-running cycles of continuous light (Choudhary et al., 2015; Kraemer  
444 et al., 2019). This low number of cycling diurnal proteins could be a consequence of the stringency  
445 of the JTK\_Cycle analysis, which only tests for periodical protein changes following a cosine  
446 function, similar to the oscillating fluctuations of a large number of mRNAs regulated by the  
447 circadian clock in Arabidopsis and animals (Doherty and Kay, 2010). Thus, in Arabidopsis rosettes  
448 the diurnal abundance of most measured proteins does not seem to be affected by the circadian  
449 clock or regulated in concert with oscillating mRNA levels, which has also been found in growing  
450 Arabidopsis leaves at fewer diurnal timepoints (Baerenfaller et al., 2012). Seedling proteins have  
451 turnover rates ranging from  $\log_2 k -4$  to  $-7$  (Fan, Rendahl, Chen, Freund, Gray, Cohen & Hegeman,  
452 2016) and the median degradation rate of proteins in growing Arabidopsis leaves is  $\sim 0.11 \text{d}^{-1}$ , but  
453 several proteins involved in protein synthesis, metabolic processes or photosynthesis have high  
454 degradation rates ranging from 0.6 up to  $2.0 \text{d}^{-1}$  (Li, Nelson, Solheim, Whealan & Millar, 2017).  
455 Some of the fluctuating proteins in CL1–6 (Figure 1) that we identified in the diurnal proteome  
456 fall into categories of proteins with high degradation rates, including proteins in ribosome

## Diurnal Arabidopsis proteome dynamics

457 biogenesis in CL3 (Figure 1) that contribute to the replacement of the leaf cytosolic ribosome  
458 population (Salih, Duncan, Li, Troesch & Millar, 2020). For these proteins, oscillating mRNAs  
459 could contribute to the translational regulation of their changing accumulation (Missra, Ernest,  
460 Lohoff, Jia, Satterlee, Ke & von Arnim, 2015), also in case of the 15 mRNAs and proteins whose  
461 peaks are shifted by 5.5 h (Figures 3C and D). This does not exclude that oscillating mRNAs also  
462 contribute to the regulation of non-fluctuating proteins if the degradation and synthesis rates of  
463 these proteins are changing during the diurnal cycle. In Arabidopsis, there is increasing evidence  
464 of diurnal and photoperiodic dynamics of mRNA translation (Mills, Engatin and von Arnim, 2018;  
465 Seaton et al., 2018). If dynamic regulation of protein degradation and synthesis is coupled to  
466 differential ribosomal loading of oscillating mRNAs, this would result in stable diurnal protein  
467 levels. At present, our diurnal proteome dataset cannot distinguish between these scenarios, but it  
468 establishes an important framework for investigating the role of protein degradation and synthesis  
469 in circadian and diurnal protein level regulation in more detail.

470

### 471 **Analysis of light-dark transitions in a diurnal cycle reveal dynamic fluctuation in the** 472 **Arabidopsis phosphoproteome**

473 Protein phosphorylation is often associated with changing environmental conditions (Li et  
474 al., 2017; S. Zhang et al., 2019; Zhao et al., 2017). Therefore, we examined time-points before  
475 (30 min) and after (10 min, 30 min) the D-L and L-D transitions for changes in the  
476 phosphoproteome (Supplemental Figure 1). We identified 1776 phosphopeptides from 1091  
477 proteins (phosphorylation site probability score  $\geq 0.8$ ) and quantified 1056 of these  
478 phosphopeptides from 725 proteins at the two light transitions (Table 1, Supplemental Table 3).  
479 We found that 176 phosphopeptides from 153 proteins at the D-L transition and 164  
480 phosphopeptides from 144 proteins at the L-D transition had significant changes in abundance  
481 (Supplemental Figure 2 and 3; Supplemental Table 4). We then benchmarked the quality of our  
482 dataset by querying it for proteins known to be diurnally regulated by protein phosphorylation  
483 (Supplemental Table 5). This revealed phototropin 1 (PHOT1), phosphoenolpyruvate carboxylase  
484 (PEPC), nitrate reductase (NIA1 and NIA2) and CF1 ATP synthase. Phototropin 1 is  
485 phosphorylated in the light (Sullivan, Thomson, Kaiserli, & Christie, 2009; Sullivan, Thomson,  
486 Lamont, Jones, & Christie, 2008), while the NIA1, NIA2 and the CF1 ATP synthase beta-subunit  
487 are phosphorylated in the dark (Kanekatsu, Saito, Motohashi, & Hisabori, 1998; Lillo, Meyer, Lea,



## Diurnal Arabidopsis proteome dynamics

488 Provan, & Olteidal, 2004; G. Moorhead et al., 1999; Reiland et al., 2009). Our quantitation of NIA1  
489 and 2 protein phosphorylation changes across time-points revealed that NIA2 was more rapidly  
490 dephosphorylated on Ser<sup>534</sup> at the D-L transition than NIA1, potentially relating to regulatory  
491 differences between NIA1 and 2. Additionally, we found a new NIA2 phosphorylation site at Ser<sup>63</sup>  
492 with opposing diurnal changes in phosphorylation at the same transition (Supplemental Figure 4).  
493 Both the rate of NIA1 and 2 phosphorylation as it relates to nitrate reduction and the new  
494 phosphorylation site require additional characterization that is beyond the scope of this study.

495 We next performed a GSEA of all significantly changing phosphoproteins (P value  $\leq$  0.01,  
496 FDR  $\leq$  0.05, gene set size  $\geq$  2) at each transition. Enriched biological processes at the D-L  
497 transition include phosphoproteins involved in light detection, nitrogen metabolism, cell wall-  
498 related processes and phosphorylation signaling, while phosphoproteins identified at the L-D  
499 transition are involved in light detection, vesicle-mediated transport, auxin signaling and nucleus  
500 organization (Table 2). We then generated a hierarchical heatmap of the phosphopeptides to  
501 identify clusters of proteins at each light transition with similar phosphorylation dynamics  
502 (Supplemental Figure 2 and 3). When compared to datasets of phosphorylated proteins previously  
503 identified in Arabidopsis growing under free-running cycle conditions (Choudhary et al., 2015;  
504 Krahmer et al., 2019), or at the ED and EN time-points of a 12-hour photoperiod (Reiland et al.,  
505 2009; Uhrig et al., 2019), our data reveals new proteins that have diurnal changes in their  
506 phosphorylation status and also novel information about the rate at which these phosphorylation  
507 events are occurring and disappearing (Supplemental Figure 2 and 3). For example, the L-D cluster  
508 I has phosphoproteins involved in nitrogen metabolism and the cell cycle (AD10 and AD30) and  
509 the L-D cluster III (BD30) has phosphoproteins involved in plastid organization (Supplemental  
510 Figure 2). In contrast, the D-L cluster II (AL10 and AL30) has phosphoproteins involved in central  
511 and carbohydrate metabolism (Supplemental Figure 3). Interestingly, parallel phosphorylation  
512 changes in L-D cluster I occur on proteins involved in nitrogen metabolism and the cell cycle.  
513 Nitrogen is acquired by plants primarily in the form of nitrate or ammonium, and is an essential  
514 macronutrient for plant growth. Nitrate signaling is linked to cell cycle progression through the  
515 TEOSINTE BRANCHED 1/ CYCLOIDEAPROLIFERATING CELL FACTOR 20 (TCP20) –  
516 NIN-LIKE PROTEIN 6/7 (NLP6/7) regulatory network. TCP20 positively regulates genes  
517 encoding proteins involved in nitrate assimilation and signaling and downregulates the expression  
518 of *CYCB1;1*, which encodes a key cell-cycle protein involved in the G2/M transition (Guan, 2017).

## Diurnal Arabidopsis proteome dynamics

519 Our data suggests that in addition to TCP20 transcriptional regulation, reversible protein  
520 phosphorylation may also play a role in this regulatory intersection between nitrate signaling and  
521 the cell cycle.

522         Similar to our analysis of protein abundance changes, we built association networks using  
523 STRING-DB to complement the GSEA analysis of the phosphoproteome (Figure 4). Association  
524 networks were generated based on phosphopeptide quantification data and *in silico* subcellular  
525 localization information to examine relationships between the significantly changing  
526 phosphoproteins at both the D-L and L-D transitions. Most of the node clusters overlap between  
527 both the D-L (Figure 4A) and L-D (Figure 4B) networks, with larger clusters consisting of proteins  
528 involved in light detection and signaling, carbon and nitrogen metabolism, protein translation,  
529 hormone signaling, ion transport, cell wall related processes and protein phosphorylation. L-D  
530 transition-specific node clusters include RNA processing, transcription and secretion, and protein  
531 transport (Figure 4B). Similar to our proteome analyses, network association and GSEA analyses  
532 showed a high degree of overlap, indicating that the two approaches revealed the same cell  
533 processes in which proteins show differences in phosphorylation.

534         Given this, we hypothesize that the significantly changing Arabidopsis proteome measured  
535 here over a 24 h photoperiod consists of proteins possessing key functions in each respective  
536 cellular process. As discussed above, protein abundance changes are generally not as widespread  
537 as transcriptome-level changes over a 24 h photoperiod (Baerenfaller et al., 2012; Graf et al., 2017;  
538 Seaton et al., 2018; Uhrig et al., 2019). Conversely, changes in protein phosphorylation can be  
539 dependent or independent of protein abundance fluctuations. To assess this, we compared our  
540 changing phosphoproteome to our changing proteome, and found that the majority of significantly  
541 changing diurnal phosphorylation events occur independent of protein abundance changes and  
542 therefore likely represent regulatory PTM events (Duby & Boutry, 2009; Le, Browning, & Gallie,  
543 2000; Lillo et al., 2004; Muench, Zhang, & Dahodwala, 2012). Further research is required to  
544 elucidate the specific roles of these phosphorylation events. Based on these results, future  
545 investigations of which seemingly stable proteins / phosphoproteins and significantly changing  
546 phosphoproteins are in fact undergoing changes in their translation and turnover, but maintain their  
547 overall abundance (Li et al., 2017) are required to fully capture how the scale and dynamics of  
548 protein and PTM changes impact plant cell regulation.

549

## Diurnal Arabidopsis proteome dynamics

### 550 **A small subset of the transition phosphoproteome has protein level changes**

551 As the result of employing enrichment methods, one major question in phosphoproteomics  
552 is how the quantified phosphorylation changes relate to changes in protein abundance. To examine  
553 this, we performed an integrated analysis of the significantly changing proteome and  
554 phosphoproteome to determine if and how phosphorylation and protein abundance changes are  
555 related. Of the 226 proteins exhibiting a significant change in phosphorylation (Table 1), 60% (136  
556 proteins) were quantified in our proteome data (Supplemental Table 6). These results are not  
557 unexpected because of the phosphopeptide enrichment strategy and indicate that 40% of the  
558 phosphorylated proteins in our phosphoproteome dataset are of lower abundance and not amongst  
559 the 4762 total quantified proteins. Further assessment of significantly changing phosphoproteins  
560 relative to the quantified proteome at the light transitions found that 25% (L-D) and 7.1% (D-L)  
561 of the changing phosphoproteins were not significantly changing at the protein level (TOST  
562  $P$  value  $\leq 0.05$ ,  $\varepsilon = 0.4$ ).

563 We then directly compared the significantly changing phosphoproteome and proteome to  
564 identify proteins exhibiting a change in both diurnal protein abundance and phosphorylation status.  
565 We found that a total of six phosphoproteins (totaling 2.1% of all 288 proteins significantly  
566 changing in protein abundance; Supplemental Table 6) that fit this criteria (Figure 5). These  
567 include nitrate reductase 1 (NIA1; AT1G77760) and 2 (NIA2; AT1G37130), protein kinase  
568 SnRK2.4 (AT1G10940), Rho guanyl-nucleotide exchange factor SPK1 (AT4G16340),  
569 microtubule binding protein WDL5 (AT4G32330), and winged-helix DNA-binding transcription  
570 factor family protein LARP1C (AT4G35890). NIA1 and 2 are directly related to nitrogen  
571 assimilation (Lillo, 2008; Lillo et al., 2004), while WDL5 has been implicated in mitigating  
572 ammonium toxicity through ETHYLENE INSENSITIVE 3 (EIN3) (Li et al., 2019). SnRK2.4  
573 binds fatty acid derived lipid phosphatidic acid to associate with the plasma membrane (Julkowska  
574 et al., 2015) and responds to changes in cell osmotic status (Munnik et al., 1999), while SPK1,  
575 WDL5 and LARP1C are connected to plant hormone signaling through abscisic acid (WDL5; Yu  
576 et al., 2019), jasmonic acid (LARP1C; B. Zhang, Jia, Yang, Yan, & Han, 2012) and auxin (SPK1;  
577 Lin et al., 2012; Nakamura et al., 2018). Of these three proteins with concerted phosphorylation  
578 and abundance changes only SPK1 showed a parallel increase in abundance and phosphorylation  
579 at the same transition (Figure 5), while WDL5 and LARP1C exhibited opposing patterns of  
580 phosphorylation and abundance changes, suggesting that phosphorylation may impact their

## Diurnal Arabidopsis proteome dynamics

581 turnover. Previously, proteins involved in phytohormone signaling have been found to be regulated  
582 by both protein phosphorylation and turnover (Dai et al., 2013; Qin et al., 2014), suggesting that  
583 these three proteins may represent new examples of hormone-mediated phosphodegrons or  
584 phospho-inhibited degrons (Vu, Gevaert, & De Smet, 2018). Further examination of the  
585 ubiquitination status of these proteins and the proximity of those ubiquitin modifications to the  
586 annotated phosphorylation event are required to fully elucidate this hypothesis.

587

### 588 **Motif analysis reveals diurnal utilization of phosphorylation sites**

589 We next hypothesized that we could connect our phosphoproteome data to a subset of  
590 protein kinases that may catalyze these diurnal events using a combination of motif enrichment  
591 analysis, available diurnal transcriptomic data and published literature. To understand which  
592 phosphorylation motifs are enriched in our dataset and to connect these to known protein kinases,  
593 we utilized Motif-X ([motif-x.med.harvard.edu](http://motif-x.med.harvard.edu); Chou & Schwartz, 2011; Schwartz & Gygi, 2005).  
594 The significantly changing phosphorylated peptides at each transition were analyzed against all a  
595 background of all quantified phosphopeptides (P value  $\leq 0.05$ ). Motifs corresponding to serine  
596 (pS) phosphorylation sites were enriched at each transition, while enrichment of phosphorylated  
597 threonine (pT) or tyrosine (pY) motifs was absent (Supplemental Table 7). The lack of pY motif  
598 enrichment has also been reported in other studies examining phosphoproteome changes under  
599 either ED vs EN (Reiland et al., 2009; Uhrig et al., 2019) or free-running circadian cycle  
600 (Choudhary et al., 2015; Krahmer et al., 2019) experimental scenerios. Only one pT motif (pTP)  
601 has been previously associated with ED vs EN phosphoproteome changes (Uhrig et al., 2019). The  
602 lack of an enriched pTP motif here is likely due to our stringent multi-time point threshold  
603 requirement for each phosphorylation site to be considered for quantification versus the two time-  
604 point comparison previously performed between ED and EN only (Uhrig et al., 2019).  
605 Furthermore, we would expect pS motifs to be enriched over either pT or pY motifs given pS  
606 events account for 84-86% of all phosphorylation events in plants, compared to only 10-12% pT  
607 and 1-4% pY (Nakagami et al., 2010; Sugiyama et al., 2008). This makes it generally less likely  
608 to find an enrichment of pT and/or pY motifs in the phosphoproteome of plants. Of the  
609 phosphorylation sites (site probability score  $\geq 0.8$ ) we quantified, 82.8%, 16.5% and 0.7% were  
610 pS, pT and pY respectively, which aligns with previously reported distributions of phosphorylation  
611 events in *Arabidopsis thaliana* (Nakagami et al., 2010; Sugiyama et al., 2008).

## Diurnal Arabidopsis proteome dynamics

612 At the L-D transition, we found 16 motifs of which 10 correspond to phosphorylation sites  
613 and motifs previously identified as targets of protein kinases CaMKII, PAK1, extracellular signal-  
614 regulated kinase (ERK 1/2), proto-oncogene c-RAF (RAF1), and cell division cycle 2 (CDC2)  
615 protein kinase A and B (Supplemental Table 7). Six phosphorylation sites did not correspond to  
616 known kinase motifs, and therefore likely represent currently uncharacterized and possibly plant-  
617 specific motifs considering the large expansion of protein kinases in plants relative to humans  
618 (Lehti-Shiu & Shiu, 2012; Zulawski et al., 2014). At the D-L transition, four of five identified  
619 motifs are known phosphorylation sites for checkpoint kinase 1 (CHK1), PAK2, calmodulin  
620 kinase IV (CaMKIV) and casein kinase (CKII) (Supplemental Table 7). CKII is known to  
621 phosphorylate the core circadian clock transcription factors LHY and CCA1 (Lu et al., 2011),  
622 which also peak at the D-L transition (Kusakina & Dodd, 2012).

623 The phosphoproteome data and motif analysis indicate that CAMKs are involved  
624 mediating L-D and D-L transition phosphosignaling and thus implicate the involvement of  
625 intracellular calcium ( $\text{Ca}^{2+}$ ) in circadian regulation (Marti Ruiz et al., 2018). This suggests that  
626 calcium-dependent calmodulin (CaM) protein kinase orthologs are interesting candidates for  
627 mediating circadian clock signaling. Unlike the enrichment of CKII motifs at only the D-L  
628 transition, we find enrichment of  $\text{Ca}^{2+}$  related kinases CaMKII (D-L and L-D) and CaMKIV (D-  
629 L) phosphorylation motifs at each transition (Supplemental Table 7). Previous analyses have also  
630 identified  $\text{Ca}^{2+}$  kinase motifs enriched at both ED and EN (CDPK-like motifs; Uhrig et al., 2019).  
631 Additionally, SnRK1-related motifs were identified in the phosphoproteome data from Arabidopsis  
632 CCA1-Ox plants growing in a free-running cycle (Krahmer et al., 2019). SnRK1 is a central  
633 mediator of energy signaling between different organelles and also functions to phosphorylate  
634 CDPKs (Wurzinger, Nukarinen, Nagele, Weckwerth, & Teige, 2018). Together, these studies and  
635 the results presented here suggest a broader role for  $\text{Ca}^{2+}$  in diurnal plant cell regulation during the  
636 L-D and D-L transitions.

637 Compared to humans, plants have more protein kinases (Lehti-Shiu & Shiu, 2012;  
638 Zulawski et al., 2014), but most of their targets remain unknown. Our phosphoproteome results,  
639 together with previously reported diurnal phosphoproteome datasets (Choudhary et al., 2015;  
640 Krahmer et al., 2019; Reiland et al., 2009; Uhrig et al., 2019) provide a compilation of  
641 phosphorylation motifs that are rapidly modified at the D-L and L-D transitions. Unfortunately,  
642 most protein kinases are outside the dynamic range of protein detection in conventional systems-

## Diurnal Arabidopsis proteome dynamics

643 level quantitative proteomic studies. However, when we integrate available transcriptional data for  
644 the diurnal expression of protein kinases (Uhrig et al., 2019) with the phosphoproteome changes  
645 uncovered here and in other studies (Choudhary et al., 2015; Krahmer et al., 2019; Reiland et al.,  
646 2009; Uhrig et al., 2019), we can begin to narrow the protein kinase sub-families and specific  
647 genes to those most likely catalyzing the observed diurnal phosphorylation events.

648

### 649 **Key plant processes involve independent changes in both proteome and phosphoproteome**

650 When we queried the data for proteins that change in their abundance and/or  
651 phosphorylation status over the 24 h photoperiod, we found proteins predominantly involved in  
652 translation, cell wall biosynthesis and multiple aspects of plant metabolism. We hypothesize that  
653 these cellular processes are particularly susceptible to diurnal plant cell regulation at the protein  
654 level. The translation rates of Arabidopsis enzymes of light-induced metabolic reactions fluctuate  
655 diurnally and this correlates with their activity (Seaton et al., 2018). For example, several central  
656 metabolic enzymes are synthesized at 50 to 100% higher rates during the light phase of the  
657 photoperiod (Pal et al., 2013; Piques et al., 2009). Correspondingly, we identified 15 proteins  
658 involved in protein translation that have diurnal changes in abundance (Table 3; Supplemental  
659 Table 2). Although they belong to several clusters shown in Figure 1A, nine of the proteins are  
660 grouped in CL3, which exhibits a general protein increase at the onset of light. In addition, we  
661 found eight translation-related proteins with changes in their phosphorylation status at L-D and D-  
662 L transitions, of which 5/8 are eukaryotic initiation factor (eIF) proteins (Table 3; Supplemental  
663 Table 8). Phosphorylation is known to affect eukaryotic translation at the initiation step (Jackson,  
664 Hellen, & Pestova, 2010; Le et al., 2000; Muench et al., 2012), and numerous eIFs and ribosomal  
665 proteins show differences in phosphorylation levels between light and dark periods (Boex-  
666 Fontvieille et al., 2013; Enganti, Cho, Toperzer, Urquidi-Camancho & von Arnim, 2018; Turkina,  
667 Klang Arstrand, & Vener, 2011; Uhrig et al., 2019). Our analysis revealed additional diurnally  
668 regulated eIFs and suggests that specific translational regulation mechanisms and ribosome  
669 composition could be controlled by light changes (e.g. day versus night) and also throughout the  
670 24h photoperiod.

671 We also find cell wall metabolic enzymes undergoing both diurnal fluctuations in protein  
672 abundance (Figure 2, Table 3; Supplemental Table 2) and changes in phosphorylation status  
673 (Figure 3, Table 3; Supplemental Table 4) at the D-L and L-D transitions. Cell wall biosynthesis

## Diurnal Arabidopsis proteome dynamics

674 is a major metabolic activity of growing plants (Barnes & Anderson, 2017; Cosgrove, 2005). We  
675 find that cellulose synthase enzymes CESA5 (AT5G09870) and CSLC6 (AT3G07330) were  
676 rapidly phosphorylated at the L-D transition. CESA5 has been shown to be phosphorylated and  
677 phosphorylation memetic-mutant enzymes increase movement of the cellulose synthase complex  
678 (CSC) in dark-grown seedlings, indicating a photoperiod-dependent regulation cell wall  
679 biosynthesis (Bischoff et al., 2011). Diurnal cellulose synthesis may also be controlled by the  
680 intracellular trafficking of CSC enzymes as a result of changes in metabolism (Ivakov et al., 2017).  
681 In dark-grown hypocotyls the ratio of CESA5 to CESA6 phosphorylation in the CSC complex is  
682 important for cellulose synthesis (Bischoff et al., 2011). Our phosphoproteome results now provide  
683 additional information on the rate of CESA5 phosphorylation at the onset of that dark period. We  
684 also find phosphorylation of the plasma membrane H<sup>+</sup>-ATPase HA1 (AT2G18960) at the L-D  
685 transition (Figure 3B). Phosphorylation activates H<sup>+</sup>-ATPases (Duby & Boutry, 2009;  
686 Sondergaard, Schulz, & Palmgren, 2004) and implicates HA1 as a primary candidate H<sup>+</sup>-ATPase  
687 in diurnal cell wall acidification to facilitate cell expansion during the night (Ivakov et al., 2017).

688 In addition to protein translation and cell wall related processes, we identified a number of  
689 enzymes involved in lipid, carbohydrate and nitrogen metabolism that change at their protein  
690 levels (Figure 2, Table 3; Supplemental Table 2) over the 24 h time-course or phosphorylation  
691 status at the D-L and L-D transitions (Table 3; Supplemental Table 9). Several of these enzymes  
692 have been previously identified as being phosphorylated (PhosPhat 4.0) (Heazlewood et al., 2008);  
693 however, our sampling of three closely spaced time-points provides new information about the  
694 rate of protein phosphorylation changes at each transition. Moreover, our results demonstrate that  
695 in Arabidopsis metabolic enzymes are subject to changes in either protein abundance or  
696 phosphorylation, or both, which likely is of regulatory relevance for metabolic pathway flux.

697 Our data reveals that several enzymes related to fatty acid, biotin, mitochondrial acetyl-  
698 CoA and chloroplast metabolism have diurnal changes in abundance (Figure 2; Table 3;  
699 Supplemental Table 2). Of particular interest are peroxisomal fatty acid  $\beta$ -oxidation enzymes 3-  
700 ketoacyl-CoA thiolase 2 (KAT2/PKT3; AT2G33150) and 3-hydroxyacyl-CoA dehydrogenase  
701 (MFP2/AIM1-like; AT3G15290). KAT2 is a central enzyme in peroxisomal fatty-acid degradation  
702 for the production of acetyl-CoA that is required for histone acetylation, which in turn affects DNA  
703 methylation (Wang et al., 2019), and ABA signaling (Jiang, Zhang, Wang, & Zhang, 2011), which  
704 is essential to daily regulation of stomatal conductance. MFP2/AIM1-like is an uncharacterized

## Diurnal Arabidopsis proteome dynamics

705 ortholog of MULTIFUNCTIONAL PROTEIN 2 (MFP2) and ENOYL-COA ISOMERASE  
706 (AIM1), which are involved in indole-3-acetic acid and jasmonic acid metabolism (Arent,  
707 Christensen, Pye, Norgaard, & Henriksen, 2010; Delker, Zolman, Miersch, & Wasternack, 2007).  
708 KAT2 loss-of-function mutants require sucrose to supplement plant acetyl-CoA production,  
709 suggesting that diurnal changes in fatty acid degradation through KAT2 and MFP2/AIM1-like are  
710 possibly tied to sucrose production and that products downstream of KAT2 and MFP2/AIM1-like  
711 (e.g. hormones) are essential to plant growth and development (Pinfield-Wells et al., 2005).  
712 Previously, fatty acid and lipid metabolism in leaves and seedlings has been suggested to be  
713 diurnally / circadian clock regulated (Gibon et al., 2006; Hsiao et al., 2014; Kim, Nusinow, Sorkin,  
714 Pruneda-Paz, & Wang, 2019; Nakamura, 2018; Nakamura et al., 2014). This includes diurnal  
715 changes in fatty acids and lipids (Gibon et al., 2006) in wild-type plants as well as diurnal changes  
716 in triacylglycerol (Hsiao et al., 2014) and phosphatidic acid (Kim et al., 2019) in the circadian  
717 clock double mutant *lhycc1*. Complementing these studies, our findings provide a new protein-  
718 level understanding of when fatty acid and lipid metabolism is diurnally impacted that differs  
719 from our current transcript / metabolite based knowledge, indicating that further protein-level  
720 investigations are required.

721 Furthermore, we also find diurnal changes in both protein abundance and protein  
722 phosphorylation for enzymes involved in carbohydrate metabolism (Table 3; Supplemental Table  
723 2, 4). Starch biosynthesis and degradation is diurnally regulated to manage the primary carbon  
724 stores in plants (Kotting, Kossmann, Zeeman, & Lloyd, 2010). For example, granule bound starch  
725 synthase 1 (GBSS1; AT1G32900) levels increase preceding the D-L transition, likely in  
726 anticipation of starch granule formation (Szydlowski et al., 2011). Debranching enzyme 1 (DBE1,  
727 AT1G03310) increases in abundance at the end of the light period to facilitate effective starch  
728 degradation in the dark (Delatte, Trevisan, Parker, & Zeeman, 2005). Other enzymes such as beta-  
729 amylase 1 (BAM1; AT3G23920) were phosphorylated immediately after the onset of light.  
730 Although the function of BAM1 phosphorylation is currently unknown, our results provide  
731 information to understand its regulation in stomatal starch degradation and sensitivity to osmotic  
732 changes in rosettes (Zanella et al., 2016).

733 Lastly, we identified enzymes in nitrogen metabolism that changed their phosphorylation  
734 status at the D-L and L-D transitions (Table 3; Supplemental Figure 4; Supplemental Table 9).  
735 This predominantly involved NITRATE REDUCTASE 1 (NIA1; AT1G77760) and 2 (NIA2;



## Diurnal Arabidopsis proteome dynamics

736 AT1G37130) proteins. NIA1 and NIA2 are regulated both transcriptionally and post-  
737 translationally by phosphorylation (Lillo, 2008; Lillo et al., 2004, Wang, Du, & Song, 2011). Our  
738 results further the understanding of NIA regulation by newly defining a rate of change in the  
739 phosphorylation of these related isozymes at the L-D and D-L transitions, while also defining when  
740 peak NIA1 and NIA2 protein levels precisely occur relative to peak transcript levels (Table 3;  
741 Supplemental Figure 4; Supplemental Table 9). *NIA1* and *NIA2* maintain tissue-specific gene  
742 expression profiles, with *NIA1* expression generally complementing that of *NIA2* in the same  
743 organ. NIA1 was predominantly found in leaves, while NIA2 was predominantly found in  
744 meristematic tissue (Olas & Wahl, 2019). We analyzed whole Arabidopsis rosettes before bolting,  
745 of which developing leaves and apical meristematic tissue comprises only a small amount of total  
746 tissue. We therefore propose that the observed difference in NIA1 and NIA2 phosphorylation rates  
747 at these known regulatory phosphorylation sites reflect a higher sensitivity of NIA2 to changes in  
748 nitrate levels in meristematic and developing tissues (Olas et al., 2019).

749 Overall, what our analysis of the phosphoproteome at three D-L and L-D time-points shows  
750 is the dynamics of phosphorylation events at both transitions. Plant genomes often encode multiple  
751 forms of enzymes (isozymes) in metabolic pathways, therefore knowing the temporal rate at which  
752 related co-expressed protein orthologs are modified by PTMs such as protein phosphorylation  
753 provides more detailed information about their cellular regulation. This information is particularly  
754 useful when deciding which protein isoform may be best for engineering increased pathway flux  
755 if two are present simultaneously. NIA1 and NIA2 represent good examples of how resolving  
756 differences in PTM rates helps us better understand the role of PTMs play in temporal protein  
757 regulation. Lastly, we hypothesize that the rate at which different phosphorylation events on a  
758 protein are temporally fluctuating can be combined with enzyme kinetics to better define how  
759 metabolic flux through multiple enzyme reactions are fine-tuned by PTMs versus changes in  
760 protein abundance. Collectively, insights such as these will not only help us better understand  
761 precise regulatory differences between related orthologs (e.g. NIA1 and NIA2), but will also be  
762 broadly applicable to the other enzymes found in our dataset for future research and more targeted  
763 experimentation with these enzymes.

764

765 **CONCLUSION**

## Diurnal Arabidopsis proteome dynamics

766 To date, detailed analyses of plant functions during a 24 h diurnal cycle have predominantly  
767 focused on genome-wide changes in gene expression. Transcript-level changes can serve as a  
768 proxy for protein-level changes, but in plants transcript levels often do not correlate with protein  
769 abundance. While proteomes have a narrower dynamic range than transcriptomes, they  
770 nevertheless complement transcriptome studies because they provide direct insights into protein-  
771 level changes. Our quantitative combined analysis of the proteome over a 12 h light : 12 h dark  
772 24 h photoperiod and the phosphoproteome at the L-D and D-L transitions during the diurnal cycle  
773 in a single experimental workflow has generated new information on diurnal abundance  
774 fluctuations and/or phosphorylation changes for Arabidopsis proteins involved in different cellular  
775 and biological processes (Figure 6). The identified proteins and phosphoproteins provide a useful  
776 basis for further experimental studies. In particular, understanding the specific functions of  
777 diurnally fluctuating ribosomal proteins involved in translation considering that hundreds of  
778 ribosomal protein isoforms are encoded by plant genomes with little information available to  
779 decipher their combinatorial assembly. Furthermore, the regulation of protein translation in plants  
780 at the protein complex level remains poorly understood, but specific time-of-day abundance peaks  
781 for these proteins suggests that temporal differences in the ribosome complex exists which likely  
782 correlated with the specific time-of-day requirements of the plant cell. Further elucidation of  
783 ribosome and protein translation regulation will be instrumental in filling the current knowledge  
784 gap between the transcriptome and proteome. Lastly, our phosphoproteome analysis during the  
785 transitions from D-L and L-D provides new information about candidate protein kinases catalyzing  
786 diurnal phosphorylation events at each transition, providing new opportunities for future systems-  
787 level and targeted studies.

788

## 789 **ACKNOWLEDGEMENTS**

790 This work was funded by TiMet - Linking the Clock to Metabolism (Grant Agreement  
791 245143) supported by the European Commission (FP7-KBBE-2009-3). Experiments conducted  
792 at Forschungszentrum Jülich were partly funded by the Helmholtz Association.

793

## Diurnal Arabidopsis proteome dynamics

### 794 REFERENCES

- 795 Abraham, P. E., Yin, H., Borland, A. M., Weighill, D., Lim, S. D., De Paoli, H. C., . . . Yang, X.  
796 (2016). Transcript, protein and metabolite temporal dynamics in the CAM plant Agave.  
797 *Nat Plants*, 2, 16178. doi:10.1038/nplants.2016.178
- 798 Adam, K., & Hunter, T. (2018). Histidine kinases and the missing phosphoproteome from  
799 prokaryotes to eukaryotes. *Lab Invest*, 98(2), 233-247. doi:10.1038/labinvest.2017.118
- 800 Annunziata, M. G., Apelt, F., Carillo, P., Krause, U., Feil, R., Koehl, K., . . . Stitt, M. (2018).  
801 Response of Arabidopsis primary metabolism and circadian clock to low night temperature  
802 in a natural light environment. *J Exp Bot*, 69(20), 4881-4895. doi:10.1093/jxb/ery276
- 803 Arent, S., Christensen, C. E., Pye, V. E., Norgaard, A., & Henriksen, A. (2010). The  
804 multifunctional protein in peroxisomal beta-oxidation: structure and substrate specificity  
805 of the Arabidopsis thaliana protein MFP2. *J Biol Chem*, 285(31), 24066-24077.  
806 doi:10.1074/jbc.M110.106005
- 807 Baerenfaller, K., Massonnet, C., Walsh, S., Baginsky, S., Buhlmann, P., Hennig, L., . . . Gruissem,  
808 W. (2012). Systems-based analysis of Arabidopsis leaf growth reveals adaptation to water  
809 deficit. *Mol Syst Biol*, 8, 606. doi:10.1038/msb.2012.39
- 810 Barboza-Barquero, L., Nagel, K. A., Jansen, M., Klasen, J. R., Kastenholz, B., Braun, S., . . .  
811 Fiorani, F. (2015). Phenotype of Arabidopsis thaliana semi-dwarfs with deep roots and  
812 high growth rates under water-limiting conditions is independent of the GA5 loss-of-  
813 function alleles. *Ann Bot*, 116(3), 321-331. doi:10.1093/aob/mcv099
- 814 Barnes, W. J., & Anderson, C. T. (2017). Release, Recycle, Rebuild: Cell wall remodeling,  
815 autodegradation, and sugar salvage for new wall biosynthesis during plant development.  
816 *Mol Plant*. doi:10.1016/j.molp.2017.08.011
- 817 Bischoff, V., Desprez, T., Mouille, G., Vernhettes, S., Gonneau, M., & Hofte, H. (2011).  
818 Phytochrome regulation of cellulose synthesis in Arabidopsis. *Curr Biol*, 21(21), 1822-  
819 1827. doi:10.1016/j.cub.2011.09.026
- 820 Blasing, O. E., Gibon, Y., Gunther, M., Hohne, M., Morcuende, R., Osuna, D., . . . Stitt, M. (2005).  
821 Sugars and circadian regulation make major contributions to the global regulation of  
822 diurnal gene expression in Arabidopsis. *Plant Cell*, 17(12), 3257-3281.  
823 doi:10.1105/tpc.105.035261
- 824 Boersema, P. J., Raijmakers, R., Lemeer, S., Mohammed, S., & Heck, A. J. (2009). Multiplex  
825 peptide stable isotope dimethyl labeling for quantitative proteomics. *Nat Protoc*, 4(4), 484-  
826 494. doi:10.1038/nprot.2009.21
- 827 Boex-Fontvieille, E., Daventure, M., Jossier, M., Zivy, M., Hodges, M., & Tcherkez, G. (2013).  
828 Photosynthetic control of Arabidopsis leaf cytoplasmic translation initiation by protein  
829 phosphorylation. *PLoS One*, 8(7), e70692. doi:10.1371/journal.pone.0070692
- 830 Bradford, M. M. (1976). A rapid and sensitive method for the quantitation of microgram quantities  
831 of protein utilizing the principle of protein-dye binding. *Anal Biochem*, 72, 248-254.
- 832 Chou, M. F., & Schwartz, D. (2011). Biological sequence motif discovery using motif-x. *Curr*  
833 *Protoc Bioinformatics*, Chapter 13, Unit 13 15-24. doi:10.1002/0471250953.bi1315s35
- 834 Choudhary, M. K., Nomura, Y., Wang, L., Nakagami, H., & Somers, D. E. (2015). Quantitative  
835 Circadian Phosphoproteomic Analysis of Arabidopsis Reveals Extensive Clock Control of  
836 Key Components in Physiological, Metabolic, and Signaling Pathways. *Mol Cell*  
837 *Proteomics*, 14(8), 2243-2260. doi:10.1074/mcp.M114.047183
- 838 Cosgrove, D. J. (2005). Growth of the plant cell wall. *Nat Rev Mol Cell Biol*, 6(11), 850-861.  
839 doi:10.1038/nrm1746

## Diurnal Arabidopsis proteome dynamics

- 840 Covington, M. F., Maloof, J. N., Straume, M., Kay, S. A., & Harmer, S. L. (2008). Global  
841 transcriptome analysis reveals circadian regulation of key pathways in plant growth and  
842 development. *Genome Biol*, 9(8), R130. doi:10.1186/gb-2008-9-8-r130
- 843 Dai, M., Xue, Q., McCray, T., Margavage, K., Chen, F., Lee, J. H., . . . Wang, H. (2013). The PP6  
844 phosphatase regulates ABI5 phosphorylation and abscisic acid signaling in Arabidopsis.  
845 *Plant Cell*, 25(2), 517-534. doi:10.1105/tpc.112.105767
- 846 Delatte, T., Trevisan, M., Parker, M. L., & Zeeman, S. C. (2005). Arabidopsis mutants Atisa1 and  
847 Atisa2 have identical phenotypes and lack the same multimeric isoamylase, which  
848 influences the branch point distribution of amylopectin during starch synthesis. *Plant J*,  
849 41(6), 815-830. doi:10.1111/j.1365-313X.2005.02348.x
- 850 Delker, C., Zolman, B. K., Miersch, O., & Wasternack, C. (2007). Jasmonate biosynthesis in  
851 Arabidopsis thaliana requires peroxisomal beta-oxidation enzymes--additional proof by  
852 properties of pex6 and aim1. *Phytochemistry*, 68(12), 1642-1650.  
853 doi:10.1016/j.phytochem.2007.04.024
- 854 Doherty, C. J., & Kay, S. A. (2010). Circadian control of global gene expression patterns. *Annu*  
855 *Rev Genet*, 44, 419-444. doi:10.1146/annurev-genet-102209-163432
- 856 Duby, G., & Boutry, M. (2009). The plant plasma membrane proton pump ATPase: a highly  
857 regulated P-type ATPase with multiple physiological roles. *Pflugers Arch*, 457(3), 645-  
858 655. doi:10.1007/s00424-008-0457-x
- 859 Enganti, R., Cho, S. K., Toperzer, J. D., Urquidi-Camacho, R. A., . . . von Arnim, A. G.,  
860 Phosphorylation of Ribosomal Protein RPS6 Integrates Light Signals and Circadian Clock  
861 Signal. *Front. Plant Sci*. 19(8), 2210-2227. doi: 10.3389/fpls.2017.02210
- 862 Fan, K-T., Rendahl, A. K., Chen, W-P., Freund, D.M., Graym W. M., Cohen, J. D., & Hegeman,  
863 A. D. (2016). Proteome Scale-Protein Turnover Analysis Using High Resolution Mass  
864 Spectrometric Data from Stable-Isotope Labeled Plants. *J. Proteome Res*, 15(3), 851-867.  
865 doi:10.1021/acs.jproteome.5b00772. Epub 2016 Jan 29
- 866 Flis, A., Fernandez, A. P., Zielinski, T., Mengin, V., Sulpice, R., Stratford, K., . . . Millar, A. J.  
867 (2015). Defining the robust behaviour of the plant clock gene circuit with absolute RNA  
868 timeseries and open infrastructure. *Open Biol*, 5(10). doi:10.1098/rsob.150042
- 869 Gibon, Y., Pyl, E. T., Sulpice, R., Lunn, J. E., Hohne, M., Gunther, M., & Stitt, M. (2009).  
870 Adjustment of growth, starch turnover, protein content and central metabolism to a  
871 decrease of the carbon supply when Arabidopsis is grown in very short photoperiods. *Plant*  
872 *Cell and Environment*, 32(7), 859-874. doi:10.1111/j.1365-3040.2009.01965.x
- 873 Gibon, Y., Usadel, B., Blaesing, O. E., Kamlage, B., Hoehne, M., Trethewey, R., & Stitt, M.  
874 (2006). Integration of metabolite with transcript and enzyme activity profiling during  
875 diurnal cycles in Arabidopsis rosettes. *Genome Biol*, 7(8), R76. doi:10.1186/gb-2006-7-8-  
876 R76
- 877 Graf, A., Coman, D., Uhrig, R. G., Walsh, S., Flis, A., Stitt, M., & Gruissem, W. (2017). Parallel  
878 analysis of Arabidopsis circadian clock mutants reveals different scales of transcriptome  
879 and proteome regulation. *Open Biol*, 7(3). doi:10.1098/rsob.160333
- 880 Grossmann, J., Roschitzki, B., Panse, C., Fortes, C., Barkow-Oesterreicher, S., Rutishauser, D., &  
881 Schlapbach, R. (2010). Implementation and evaluation of relative and absolute  
882 quantification in shotgun proteomics with label-free methods. *J Proteomics*, 73(9), 1740-  
883 1746. doi:10.1016/j.jprot.2010.05.011
- 884 Guan, P. (2017). Dancing with Hormones: A Current Perspective of Nitrate Signaling and  
885 Regulation in Arabidopsis. *Front Plant Sci*, 8, 1697. doi:10.3389/fpls.2017.01697

## Diurnal Arabidopsis proteome dynamics

- 886 Heazlewood, J. L., Durek, P., Hummel, J., Selbig, J., Weckwerth, W., Walther, D., & Schulze, W.  
887 X. (2008). PhosPhAt: a database of phosphorylation sites in *Arabidopsis thaliana* and a  
888 plant-specific phosphorylation site predictor. *Nucleic Acids Res*, *36*(Database issue),  
889 D1015-1021. doi:10.1093/nar/gkm812
- 890 Hughes, M. E., Hogenesch, J. B., & Kornacker, K. (2010). JTK\_CYCLE: an efficient  
891 nonparametric algorithm for detecting rhythmic components in genome-scale data sets. *J*  
892 *Biol Rhythms*, *25*(5), 372-380. doi:10.1177/0748730410379711
- 893 Hsiao, A. S., Haslam, R. P., Michaelson, L. V., Liao, P., Napier, J. A., & Chye, M. L. (2014). Gene  
894 expression in plant lipid metabolism in *Arabidopsis* seedlings. *PLoS One*, *9*(9), e107372.  
895 doi:10.1371/journal.pone.0107372
- 896 Ivakov, A., Flis, A., Apelt, F., Funfgeld, M., Scherer, U., Stitt, M., . . . Suslov, D. (2017). Cellulose  
897 Synthesis and Cell Expansion Are Regulated by Different Mechanisms in Growing  
898 *Arabidopsis* Hypocotyls. *Plant Cell*, *29*(6), 1305-1315. doi:10.1105/tpc.16.00782
- 899 Jackson, R. J., Hellen, C. U., & Pestova, T. V. (2010). The mechanism of eukaryotic translation  
900 initiation and principles of its regulation. *Nat Rev Mol Cell Biol*, *11*(2), 113-127.  
901 doi:10.1038/nrm2838
- 902 Jiang, T., Zhang, X. F., Wang, X. F., & Zhang, D. P. (2011). *Arabidopsis* 3-ketoacyl-CoA thiolase-  
903 2 (KAT2), an enzyme of fatty acid beta-oxidation, is involved in ABA signal transduction.  
904 *Plant Cell Physiol*, *52*(3), 528-538. doi:10.1093/pcp/pcr008
- 905 Julkowska, M. M., McLoughlin, F., Galvan-Ampudia, C. S., Rankenberg, J. M., Kawa, D.,  
906 Klimecka, M., . . . Testerink, C. (2015). Identification and functional characterization of  
907 the *Arabidopsis* Snf1-related protein kinase SnRK2.4 phosphatidic acid-binding domain.  
908 *Plant Cell Environ*, *38*(3), 614-624. doi:10.1111/pce.12421
- 909 Kanekatsu, M., Saito, H., Motohashi, K., & Hisabori, T. (1998). The beta subunit of chloroplast  
910 ATP synthase (CF0CF1-ATPase) is phosphorylated by casein kinase II. *Biochemistry and*  
911 *Molecular Biology International*, *46*(1), 99-105.
- 912 Kerk, D., Templeton, G., & Moorhead, G. B. (2008). Evolutionary radiation pattern of novel  
913 protein phosphatases revealed by analysis of protein data from the completely sequenced  
914 genomes of humans, green algae, and higher plants. *Plant Physiol*, *146*(2), 351-367.  
915 doi:10.1104/pp.107.111393
- 916 Kim, S. C., Nusinow, D. A., Sorkin, M. L., Pruneda-Paz, J., & Wang, X. (2019). Interaction and  
917 Regulation Between Lipid Mediator Phosphatidic Acid and Circadian Clock Regulators.  
918 *Plant Cell*, *31*(2), 399-416. doi:10.1105/tpc.18.00675
- 919 Kotting, O., Kossmann, J., Zeeman, S. C., & Lloyd, J. R. (2010). Regulation of starch metabolism:  
920 the age of enlightenment? *Curr Opin Plant Biol*, *13*(3), 321-329.  
921 doi:10.1016/j.pbi.2010.01.003
- 922 Krahmer, J., Hindle, M., Perby, L., Nielson, T. H., VanOoijen, G., Halliday, K. J., . . . Millar, A.  
923 J. (2019). Circadian protein regulation in the green lineage II. The clock gene circuit  
924 controls a phospho-dawn in *Arabidopsis thaliana*. *bioRxiv*. doi:10.1101/760892
- 925 Kusakina, J., & Dodd, A. N. (2012). Phosphorylation in the plant circadian system. *Trends Plant*  
926 *Sci*, *17*(10), 575-583. doi:10.1016/j.tplants.2012.06.008
- 927 Le, H., Browning, K. S., & Gallie, D. R. (2000). The phosphorylation state of poly(A)-binding  
928 protein specifies its binding to poly(A) RNA and its interaction with eukaryotic initiation  
929 factor (eIF) 4F, eIFiso4F, and eIF4B. *J Biol Chem*, *275*(23), 17452-17462.  
930 doi:10.1074/jbc.M001186200

## Diurnal Arabidopsis proteome dynamics

- 931 Lehti-Shiu, M. D., & Shiu, S. H. (2012). Diversity, classification and function of the plant protein  
932 kinase superfamily. *Philos Trans R Soc Lond B Biol Sci*, 367(1602), 2619-2639.  
933 doi:10.1098/rstb.2012.0003
- 934 Li, F., Li, M., Wang, P., Cox, K. L., Jr., Duan, L., Dever, J. K., . . . He, P. (2017). Regulation of  
935 cotton (*Gossypium hirsutum*) drought responses by mitogen-activated protein (MAP)  
936 kinase cascade-mediated phosphorylation of GhWRKY59. *New Phytol*, 215(4), 1462-  
937 1475. doi:10.1111/nph.14680
- 938 Li, G., Zhang, L., Wang, M., Di, D., Kronzucker, H. J., & Shi, W. (2019). The Arabidopsis  
939 AMOT1/EIN3 gene plays an important role in the amelioration of ammonium toxicity. *J*  
940 *Exp Bot*, 70(4), 1375-1388. doi:10.1093/jxb/ery457
- 941 Li, L., Nelson, C. J., Trosch, J., Castleden, I., Huang, S., & Millar, A. H. (2017). Protein  
942 Degradation Rate in Arabidopsis thaliana Leaf Growth and Development. *Plant Cell*,  
943 29(2), 207-228. doi:10.1105/tpc.16.00768
- 944 Lillo, C. (2008). Signalling cascades integrating light-enhanced nitrate metabolism. *Biochem J*,  
945 415(1), 11-19. doi:10.1042/BJ20081115
- 946 Lillo, C., Meyer, C., Lea, U. S., Provan, F., & Olstedal, S. (2004). Mechanism and importance of  
947 post-translational regulation of nitrate reductase. *J Exp Bot*, 55(401), 1275-1282.  
948 doi:10.1093/jxb/erh132
- 949 Lin, D., Nagawa, S., Chen, J., Cao, L., Chen, X., Xu, T., . . . Yang, Z. (2012). A ROP GTPase-  
950 dependent auxin signaling pathway regulates the subcellular distribution of PIN2 in  
951 Arabidopsis roots. *Curr Biol*, 22(14), 1319-1325. doi:10.1016/j.cub.2012.05.019
- 952 Lu, S. X., Liu, H., Knowles, S. M., Li, J., Ma, L., Tobin, E. M., & Lin, C. (2011). A role for protein  
953 kinase casein kinase2 alpha-subunits in the Arabidopsis circadian clock. *Plant Physiol*,  
954 157(3), 1537-1545. doi:10.1104/pp.111.179846
- 955 Ma, C., Haslbeck, M., Babujee, L., Jahn, O., & Reumann, S. (2006). Identification and  
956 characterization of a stress-inducible and a constitutive small heat-shock protein targeted  
957 to the matrix of plant peroxisomes. *Plant Physiol*, 141(1), 47-60.  
958 doi:10.1104/pp.105.073841
- 959 Manning, G., Whyte, D. B., Martinez, R., Hunter, T., & Sudarsanam, S. (2002). The protein kinase  
960 complement of the human genome. *Science*, 298(5600), 1912-1934.  
961 doi:10.1126/science.1075762
- 962 Marti Ruiz, M. C., Hubbard, K. E., Gardner, M. J., Jung, H. J., Aubry, S., Hotta, C. T., . . . Webb,  
963 A. A. R. (2018). Circadian oscillations of cytosolic free calcium regulate the Arabidopsis  
964 circadian clock. *Nat Plants*, 4(9), 690-698. doi:10.1038/s41477-018-0224-8
- 965 Martin-Perez, M., & Villen, J. (2017). Determinants and Regulation of Protein Turnover in Yeast.  
966 *Cell Systems*, 5(3), 283-294 e285. doi:10.1016/j.cels.2017.08.008
- 967 Mills, S. C., Enganti, R., & von Arnim, A. G. (2018). What makes ribosomes tick? *RNA Biol*,  
968 15(1), 44-54. doi: 10.1080/15476286.2017.1391444
- 969 Missra, M., Ernest, B., Lohoff, T., Jia, Q., Satterlee, J., Ke, K., & von Arnim, A. G. (2015). The  
970 Circadian Clock Modulates Global Daily Cycles of mRNA Ribosome Loading. *Plant Cell*,  
971 27(9), 2582-2599. doi: 10.1105/tpc.15.00546. Epub 2015 Sep 21
- 972 Mockler, T. C., Michael, T. P., Priest, H. D., Shen, R., Sullivan, C. M., Givan, S. A., . . . Chory, J.  
973 (2007). The DIURNAL project: DIURNAL and circadian expression profiling, model-  
974 based pattern matching, and promoter analysis. *Cold Spring Harb Symp Quant Biol*, 72,  
975 353-363. doi:10.1101/sqb.2007.72.006

## Diurnal Arabidopsis proteome dynamics

- 976 Moorhead, G., Douglas, P., Cotelle, V., Harthill, J., Morrice, N., Meek, S., . . . MacKintosh, C.  
977 (1999). Phosphorylation-dependent interactions between enzymes of plant metabolism and  
978 14-3-3 proteins. *Plant J*, 18(1), 1-12. doi:10.1046/j.1365-313x.1999.00417.x
- 979 Moorhead, G. B., Trinkle-Mulcahy, L., Nimick, M., De Wever, V., Campbell, D. G., Gourlay, R.,  
980 . . . Lamond, A. I. (2008). Displacement affinity chromatography of protein phosphatase  
981 one (PP1) complexes. *BMC Biochem*, 9, 28. doi:10.1186/1471-2091-9-28
- 982 Muench, D. G., Zhang, C., & Dahodwala, M. (2012). Control of cytoplasmic translation in plants.  
983 *Wiley Interdiscip Rev RNA*, 3(2), 178-194. doi:10.1002/wrna.1104
- 984 Munnik, T., Ligterink, W., Meskiene, I. I., Calderini, O., Beyerly, J., Musgrave, A., & Hirt, H.  
985 (1999). Distinct osmo-sensing protein kinase pathways are involved in signalling moderate  
986 and severe hyper-osmotic stress. *Plant J*, 20(4), 381-388. doi:10.1046/j.1365-  
987 313x.1999.00610.x
- 988 Nakagami, H., Sugiyama, N., Mochida, K., Daudi, A., Yoshida, Y., Toyoda, T., . . . Shirasu, K.  
989 (2010). Large-scale comparative phosphoproteomics identifies conserved phosphorylation  
990 sites in plants. *Plant Physiol*, 153(3), 1161-1174. doi:10.1104/pp.110.157347
- 991 Nakamura, M., Claes, A. R., Grebe, T., Hermkes, R., Viotti, C., Ikeda, Y., & Grebe, M. (2018).  
992 Auxin and ROP GTPase Signaling of Polar Nuclear Migration in Root Epidermal Hair  
993 Cells. *Plant Physiol*, 176(1), 378-391. doi:10.1104/pp.17.00713
- 994 Nakamura, Y. (2018). Membrane Lipid Oscillation: An Emerging System of Molecular Dynamics  
995 in the Plant Membrane. *Plant Cell Physiol*, 59(3), 441-447. doi:10.1093/pcp/pcy023
- 996 Nakamura, Y., Andres, F., Kanehara, K., Liu, Y. C., Coupland, G., & Dormann, P. (2014). Diurnal  
997 and circadian expression profiles of glycerolipid biosynthetic genes in Arabidopsis. *Plant*  
998 *Signal Behav*, 9(9), e29715. doi:10.4161/psb.29715
- 999 Nohales, M. A., & Kay, S. A. (2016). Molecular mechanisms at the core of the plant circadian  
1000 oscillator. *Nat Struct Mol Biol*, 23(12), 1061-1069. doi:10.1038/nsmb.3327
- 1001 Oakenfull, R. J., & Davis, S. J. (2017). Shining a light on the Arabidopsis circadian clock. *Plant*  
1002 *Cell Environ*. doi:10.1111/pce.13033
- 1003 Olas, J. J., Van Dingenen, J., Abel, C., Dzialo, M. A., Feil, R., Krapp, A., . . . Wahl, V. (2019).  
1004 Nitrate acts at the Arabidopsis thaliana shoot apical meristem to regulate flowering time.  
1005 *New Phytol*, 223(2), 814-827. doi:10.1111/nph.15812
- 1006 Olas, J. J., & Wahl, V. (2019). Tissue-specific NIA1 and NIA2 expression in Arabidopsis thaliana.  
1007 *Plant Signal Behav*, 14(11), 1656035. doi:10.1080/15592324.2019.1656035
- 1008 Olsen, J. V., Blagoev, B., Gnäd, F., Macek, B., Kumar, C., Mortensen, P., & Mann, M. (2006).  
1009 Global, in vivo, and site-specific phosphorylation dynamics in signaling networks. *Cell*,  
1010 127(3), 635-648. doi:10.1016/j.cell.2006.09.026
- 1011 Pal, S. K., Liput, M., Piques, M., Ishihara, H., Obata, T., Martins, M. C., . . . Stitt, M. (2013).  
1012 Diurnal changes of polysome loading track sucrose content in the rosette of wild-type  
1013 arabidopsis and the starchless pgm mutant. *Plant Physiol*, 162(3), 1246-1265.  
1014 doi:10.1104/pp.112.212258
- 1015 Pan, R., Reumann, S., Lisik, P., Tietz, S., Olsen, L. J., & Hu, J. (2018). Proteome analysis of  
1016 peroxisomes from dark-treated senescent Arabidopsis leaves. *J Integr Plant Biol*, 60(11),  
1017 1028-1050. doi:10.1111/jipb.12670
- 1018 Pinfield-Wells, H., Rylott, E. L., Gilday, A. D., Graham, S., Job, K., Larson, T. R., & Graham, I.  
1019 A. (2005). Sucrose rescues seedling establishment but not germination of Arabidopsis  
1020 mutants disrupted in peroxisomal fatty acid catabolism. *Plant J*, 43(6), 861-872.  
1021 doi:10.1111/j.1365-313X.2005.02498.x

## Diurnal Arabidopsis proteome dynamics

- 1022 Piques, M., Schulze, W. X., Hohne, M., Usadel, B., Gibon, Y., Rohwer, J., & Stitt, M. (2009).  
1023 Ribosome and transcript copy numbers, polysome occupancy and enzyme dynamics in  
1024 Arabidopsis. *Mol Syst Biol*, 5, 314. doi:10.1038/msb.2009.68
- 1025 Qin, Q., Wang, W., Guo, X., Yue, J., Huang, Y., Xu, X., . . . Hou, S. (2014). Arabidopsis DELLA  
1026 protein degradation is controlled by a type-one protein phosphatase, TOPP4. *PLoS Genet*,  
1027 10(7), e1004464. doi:10.1371/journal.pgen.1004464
- 1028 Rao, R. S., Thelen, J. J., & Miernyk, J. A. (2014). In silico analysis of protein Lys-N(-)acetylation  
1029 in plants. *Front Plant Sci*, 5, 381. doi:10.3389/fpls.2014.00381
- 1030 Reiland, S., Messerli, G., Baerenfaller, K., Gerrits, B., Endler, A., Grossmann, J., . . . Baginsky, S.  
1031 (2009). Large-scale Arabidopsis phosphoproteome profiling reveals novel chloroplast  
1032 kinase substrates and phosphorylation networks. *Plant Physiol*, 150(2), 889-903.  
1033 doi:10.1104/pp.109.138677
- 1034 Rigbolt, K. T., Vanselow, J. T., & Blagoev, B. (2011). GProX, a user-friendly platform for  
1035 bioinformatics analysis and visualization of quantitative proteomics data. *Mol Cell*  
1036 *Proteomics*, 10(8), O110 007450. doi:10.1074/mcp.O110.007450
- 1037 Robles, M. S., Humphrey, S. J., & Mann, M. (2017). Phosphorylation Is a Central Mechanism for  
1038 Circadian Control of Metabolism and Physiology. *Cell Metab*, 25(1), 118-127.  
1039 doi:10.1016/j.cmet.2016.10.004
- 1040 Salih, K-J., Duncan, O., Li, L., Trosch, J., & Millar, A. H. (2020). The composition and turnover  
1041 of the Arabidopsis thaliana 80S cytosolic ribosome. *Biochem J*, 477(16), 3019-3032. doi:  
1042 10.1042/BCJ20200385
- 1043 Schwartz, D., & Gygi, S. P. (2005). An iterative statistical approach to the identification of protein  
1044 phosphorylation motifs from large-scale data sets. *Nat Biotechnol*, 23(11), 1391-1398.  
1045 doi:10.1038/nbt1146
- 1046 Seaton, D. D., Graf, A., Baerenfaller, K., Stitt, M., Millar, A. J., & Gruissem, W. (2018).  
1047 Photoperiodic control of the Arabidopsis proteome reveals a translational coincidence  
1048 mechanism. *Mol Syst Biol*, 14(3), e7962. doi:10.15252/msb.20177962
- 1049 Seluzicki, A., Burko, Y., & Chory, J. (2017). Dancing in the dark: darkness as a signal in plants.  
1050 *Plant Cell Environ*. doi:10.1111/pce.12900
- 1051 Simillion, C., Liechti, R., Lischer, H. E., Ioannidis, V., & Bruggmann, R. (2017). Avoiding the  
1052 pitfalls of gene set enrichment analysis with SetRank. *BMC Bioinformatics*, 18(1), 151.  
1053 doi:10.1186/s12859-017-1571-6
- 1054 Sondergaard, T. E., Schulz, A., & Palmgren, M. G. (2004). Energization of transport processes in  
1055 plants. roles of the plasma membrane H<sup>+</sup>-ATPase. *Plant Physiol*, 136(1), 2475-2482.  
1056 doi:10.1104/pp.104.048231
- 1057 Staiger, D., Shin, J., Johansson, M., & Davis, S. J. (2013). The circadian clock goes genomic.  
1058 *Genome Biol*, 14(6), 208. doi:10.1186/gb-2013-14-6-208
- 1059 Sugiyama, N., Nakagami, H., Mochida, K., Daudi, A., Tomita, M., Shirasu, K., & Ishihama, Y.  
1060 (2008). Large-scale phosphorylation mapping reveals the extent of tyrosine  
1061 phosphorylation in Arabidopsis. *Mol Syst Biol*, 4, 193. doi:10.1038/msb.2008.32
- 1062 Sullivan, S., Thomson, C. E., Kaiserli, E., & Christie, J. M. (2009). Interaction specificity of  
1063 Arabidopsis 14-3-3 proteins with phototropin receptor kinases. *FEBS Lett*, 583(13), 2187-  
1064 2193. doi:10.1016/j.febslet.2009.06.011
- 1065 Sullivan, S., Thomson, C. E., Lamont, D. J., Jones, M. A., & Christie, J. M. (2008). In vivo  
1066 phosphorylation site mapping and functional characterization of Arabidopsis phototropin  
1067 1. *Mol Plant*, 1(1), 178-194. doi:10.1093/mp/ssm017



## Diurnal Arabidopsis proteome dynamics

- 1068 Szklarczyk, D., Morris, J. H., Cook, H., Kuhn, M., Wyder, S., Simonovic, M., . . . von Mering, C.  
1069 (2017). The STRING database in 2017: quality-controlled protein-protein association  
1070 networks, made broadly accessible. *Nucleic Acids Research*, *45*(D1), D362-D368.  
1071 doi:10.1093/nar/gkw937
- 1072 Szydlowski, N., Ragel, P., Hennen-Bierwagen, T. A., Planchot, V., Myers, A. M., Merida, A., . . .  
1073 Wattedled, F. (2011). Integrated functions among multiple starch synthases determine both  
1074 amylopectin chain length and branch linkage location in Arabidopsis leaf starch. *J Exp Bot*,  
1075 *62*(13), 4547-4559. doi:10.1093/jxb/err172
- 1076 Tanz, S. K., Castleden, I., Hooper, C. M., Vacher, M., Small, I., & Millar, H. A. (2013). SUBA3:  
1077 a database for integrating experimentation and prediction to define the SUBcellular  
1078 location of proteins in Arabidopsis. *Nucleic Acids Res*, *41*(Database issue), D1185-1191.  
1079 doi:10.1093/nar/gks1151
- 1080 Türker, C., Akal, F., Joho, D., Panse, C., Barkow-Oesterreicher, S., Rehrauer, H., & Schlapbach,  
1081 R. (2010). B-Fabric: the Swiss Army Knife for life sciences. *10: Proceedings of the 13th*  
1082 *International Conference on Extending Database Technology*.  
1083 doi:10.1145/1739041.1739135
- 1084 Turkina, M. V., Klang Arstrand, H., & Vener, A. V. (2011). Differential phosphorylation of  
1085 ribosomal proteins in Arabidopsis thaliana plants during day and night. *PLoS One*, *6*(12),  
1086 e29307. doi:10.1371/journal.pone.0029307
- 1087 Uehara, T. N., Mizutani, Y., Kuwata, K., Hirota, T., Sato, A., Mizoi, J., . . . Nakamichi, N. (2019).  
1088 Casein kinase 1 family regulates PRR5 and TOC1 in the Arabidopsis circadian clock. *Proc*  
1089 *Natl Acad Sci U S A*, *116*(23), 11528-11536. doi:10.1073/pnas.1903357116
- 1090 Uhrig, R. G., Labandera, A. M., & Moorhead, G. B. (2013). Arabidopsis PPP family of  
1091 serine/threonine protein phosphatases: many targets but few engines. *Trends Plant Sci*,  
1092 *18*(9), 505-513. doi:10.1016/j.tplants.2013.05.004
- 1093 Uhrig, R. G., Schlapfer, P., Roschitzki, B., Hirsch-Hoffmann, M., & Gruissem, W. (2019). Diurnal  
1094 changes in concerted plant protein phosphorylation and acetylation in Arabidopsis organs  
1095 and seedlings. *Plant J*, *99*(1), 176-194. doi:10.1111/tpj.14315
- 1096 Usadel, B., Blasing, O. E., Gibon, Y., Retzlaff, K., Hohne, M., Gunther, M., & Stitt, M. (2008).  
1097 Global transcript levels respond to small changes of the carbon status during progressive  
1098 exhaustion of carbohydrates in Arabidopsis rosettes. *Plant Physiol*, *146*(4), 1834-1861.  
1099 doi:10.1104/pp.107.115592
- 1100 Vu, L. D., Gevaert, K., & De Smet, I. (2018). Protein Language: Post-Translational Modifications  
1101 Talking to Each Other. *Trends Plant Sci*, *23*(12), 1068-1080.  
1102 doi:10.1016/j.tplants.2018.09.004
- 1103 Wang, L., Wang, C., Liu, X., Cheng, J., Li, S., Zhu, J. K., & Gong, Z. (2019). Peroxisomal beta-  
1104 oxidation regulates histone acetylation and DNA methylation in Arabidopsis. *Proc Natl*  
1105 *Acad Sci U S A*, *116*(21), 10576-10585. doi:10.1073/pnas.1904143116
- 1106 Wang, P., Du, Y., & Song, C. P. (2011). Phosphorylation by MPK6: a conserved transcriptional  
1107 modification mediates nitrate reductase activation and NO production? *Plant Signal Behav*,  
1108 *6*(6), 889-891. doi:10.4161/psb.6.6.15308
- 1109 Wisniewski, J. R., Zougman, A., Nagaraj, N., & Mann, M. (2009). Universal sample preparation  
1110 method for proteome analysis. *Nat Meth*, *6*(5), 359-362.  
1111 doi:[http://www.nature.com/nmeth/journal/v6/n5/supinfo/nmeth.1322\\_S1.html](http://www.nature.com/nmeth/journal/v6/n5/supinfo/nmeth.1322_S1.html)

## Diurnal Arabidopsis proteome dynamics

- 1112 Wurzinger, B., Nukarinen, E., Nagele, T., Weckwerth, W., & Teige, M. (2018). The SnRK1  
1113 Kinase as Central Mediator of Energy Signaling between Different Organelles. *Plant*  
1114 *Physiol*, 176(2), 1085-1094. doi:10.1104/pp.17.01404
- 1115 Yu, Y., Wang, J., Li, S., Kakan, X., Zhou, Y., Miao, Y., . . . Huang, R. (2019). Ascorbic Acid  
1116 Integrates the Antagonistic Modulation of Ethylene and Abscisic Acid in the Accumulation  
1117 of Reactive Oxygen Species. *Plant Physiol*, 179(4), 1861-1875. doi:10.1104/pp.18.01250
- 1118 Zanella, M., Borghi, G. L., Pirone, C., Thalmann, M., Pazmino, D., Costa, A., . . . Sparla, F. (2016).  
1119 beta-amylase 1 (BAM1) degrades transitory starch to sustain proline biosynthesis during  
1120 drought stress. *J Exp Bot*, 67(6), 1819-1826. doi:10.1093/jxb/erv572
- 1121 Zhang, B., Jia, J., Yang, M., Yan, C., & Han, Y. (2012). Overexpression of a LAM domain  
1122 containing RNA-binding protein LARP1c induces precocious leaf senescence in  
1123 Arabidopsis. *Mol Cells*, 34(4), 367-374. doi:10.1007/s10059-012-0111-5
- 1124 Zhang, S., Feng, M., Chen, W., Zhou, X., Lu, J., Wang, Y., . . . Gao, J. (2019). In rose, transcription  
1125 factor PTM balances growth and drought survival via PIP2;1 aquaporin. *Nat Plants*, 5(3),  
1126 290-299. doi:10.1038/s41477-019-0376-1
- 1127 Zhao, C., Wang, P., Si, T., Hsu, C. C., Wang, L., Zayed, O., . . . Zhu, J. K. (2017). MAP Kinase  
1128 Cascades Regulate the Cold Response by Modulating ICE1 Protein Stability. *Dev Cell*,  
1129 43(5), 618-629 e615. doi:10.1016/j.devcel.2017.09.024
- 1130 Zhou, H., Low, T. Y., Hennrich, M. L., van der Toorn, H., Schwend, T., Zou, H., . . . Heck, A. J.  
1131 (2011). Enhancing the identification of phosphopeptides from putative basophilic kinase  
1132 substrates using Ti (IV) based IMAC enrichment. *Mol Cell Proteomics*, 10(10), M110  
1133 006452. doi:10.1074/mcp.M110.006452
- 1134 Zulawski, M., Schulze, G., Braginets, R., Hartmann, S., & Schulze, WX. (2014). The Arabidopsis  
1135 Kinome: phylogeny and evolutionary insights into functional diversification. *BMC*  
1136 *Genomics*, 15(1), 548-562. doi: 10.1186/1471-2164-15-548

1137

1138

### 1139 **FIGURES:**

1140 **Figure 1: Analysis of the diurnal proteome: clustering, enrichment analysis and subcellular**  
1141 **localization.**

1142 (A) Significantly changing proteins ( $FC \geq 1.5$ , ANOVA P value  $\leq 0.05$ ,  $\geq 2$  peptides) were  
1143 subjected to an unsupervised clustering analysis (GProX; <http://gprox.sourceforge.net>) resolving  
1144 6 protein clusters. Y- and X-axis depict standardized expression level and harvest time (Zeitgeber  
1145 time; ZT), respectively. Median expression is depicted in blue. (B) Term enrichment analysis of  
1146 significantly changing proteins using SetRank (P value  $\leq 0.01$ , size  $\geq 2$ ). (C) Standardized diurnal  
1147 transcript expression level of each corresponding clustered protein (Log10). Median expression is  
1148 depicted in blue. Transcript expression level was obtained from Diurnal DB  
1149 (<http://diurnal.mocklerlab.org/>). (D) *In silico* subcellular localization analysis of significantly

## Diurnal Arabidopsis proteome dynamics

1150 changing proteins using SUBAcon (SUBA3; <http://suba3.plantenergy.uwa.edu.au>). Bracketed  
1151 numbers represent the number of proteins per cluster.

### 1152 **Figure 2: Interaction networks of the diurnal proteome.**

1153 An association network analysis using STRING-DB (<https://string-db.org/>) of statistically  
1154 significant diurnally changing proteins was performed using the generated unsupervised clusters  
1155 shown in Figure 1. Edge thickness indicates confidence of the connection between two nodes  
1156 (0.5 - 1.0). Changing proteins (grey circles) are labeled by either their primary gene annotation or  
1157 Arabidopsis gene identifier (AGI). The colored outline of each node represents the *in silico*  
1158 predicted subcellular localization of this protein (SUBAcon; [suba3.plantenergy.uwa.edu.au](http://suba3.plantenergy.uwa.edu.au)).  
1159 Nucleus (red), cytosol (orange), plastid (green), mitochondria (blue), plasma membrane (purple),  
1160 peroxisome (dark yellow), endoplasmic reticulum/golgi/secreted (black) are depicted. A second  
1161 layer of STRING-DB identified proteins (white nodes) not found in each respective significantly  
1162 changing protein cluster was used to highlight the interconnectedness of proteins in the cluster.  
1163 Multiple nodes encompassed by a labelled grey circle represent proteins involved in the same  
1164 cellular process.

### 1165 **Figure 3: Comparative analysis of diurnal proteome to free-running circadian proteome** 1166 **(Krahmer *et al.*, 2019).**

1167 (A) Number of proteins measured in this study (blue circle) and Krahmer *et al.* (2019) (orange  
1168 circle). Number of stable proteins (black), fluctuating proteins in our study only (magenta),  
1169 Krahmer *et al.* (2019) only (green) and both studies (blue). (B) Table of 21 proteins that show  
1170 significant (B.Q) fluctuation using JTK with their respective peak time period for protein and  
1171 transcript levels (Diurnal DB, <http://diurnal.mocklerlab.org/>). (C and D) Normalized (Median = 0,  
1172 Amplitude of 2) protein levels of 15 proteins both fluctuating in protein and transcript levels (gray  
1173 lines) shifted to peak at time zero for protein levels in (C) and transcript levels in (D). Protein data  
1174 was plotted twice to visualize a 48 h timeframe. The theoretical cosine functions with associated  
1175 99% confidence interval for protein levels (C, red) and transcript levels (D, blue) are shifted by  
1176 5.5 h.

1177

### 1178 **Figure 4: Interaction networks of the diurnal phosphoproteome at the D-L and L-D** 1179 **transitions.**

## Diurnal Arabidopsis proteome dynamics

1180 An association network analysis of statistically significant diurnally changing phosphorylated  
1181 proteins was performed using the STRING-DB (ANOVA  $P$  value  $\leq 0.05$ ). Edge thickness  
1182 indicates strength of the connection between two nodes (0.5 - 1.0). Phosphorylated proteins (grey  
1183 circles) are labeled by either their primary gene annotation or Arabidopsis gene identifier (AGI).  
1184 Outer circle around each node depicts the standardized relative log<sub>2</sub> FC in phosphorylation status  
1185 of this protein between time-points. The sliding scale of yellow to blue represents a relative  
1186 increase and decrease in phosphorylation, respectively. The inner colored circles represent *in silico*  
1187 predicted subcellular localization (SUBAcon; suba3.plantenergy.uwa.edu.au). Nucleus (red),  
1188 cytosol (orange), plastid (green), mitochondria (blue), plasma membrane (purple), peroxisome  
1189 (dark yellow), endoplasmic reticulum/golgi/secreted (black) are depicted. A second shell of 5  
1190 STRING-DB proteins (white circles) not found in our dataset was used to highlight the  
1191 interconnectedness of the network. Multiple nodes encompassed by a labelled grey circle represent  
1192 proteins involved in the same cellular process.

### 1193 **Figure 5: Proteins exhibiting a significant change in both diurnal protein abundance and** 1194 **protein phosphorylation status.**

1195 Six proteins were found to significantly change in protein abundance and protein phosphorylation:  
1196 AT1G10940 (SnRK2.4; blue), AT1G37130 (NIA2; black), AT1G77760 (NIA1; grey),  
1197 AT4G32330 (TPX2; red), AT4G16340 (SPK1; yellow), AT4G35890 (LARP1c; green). (A)  
1198 Diurnal protein abundance change profile. Standardized fold-change values are plotted relative to  
1199 ZT. (B) D-L and (C) L-D phosphorylation change profiles. Standardized fold-change values are  
1200 plotted relative to transition time-point either 10 or 30 minutes before light (BL), after light (AL),  
1201 before dark (BD) or after dark (AD). Standard error bars are shown.

### 1202 **Figure 6: Schematic representation of Arabidopsis cellular and biological processes with** 1203 **diurnal fluctuations in protein abundance or protein phosphorylation.**

1205 The inner three circles show terms of processes involving proteins with a maximal change in  
1206 abundance during the day (yellow) or night (black). The outer circle show terms of processes  
1207 involving proteins with changes in protein phosphorylation at the dark-to-light (D-L) transition  
1208 (top) or light-to-dark (L-D) transition (bottom). The segments of each inner circle relative to ZT0  
1209 (day) or ZT12 (night) represent the approximate time interval in which proteins (ZT) and  
1210 phosphoproteins (30 min before light or dark, 10 and 30 min after light or dark) involved in each

## Diurnal Arabidopsis proteome dynamics

1211 process have their maximal change. The cellular and biological terms shown here were obtained  
1212 by GO term enrichment of each protein and phosphoprotein cluster as outlined in Materials and  
1213 Methods.

1214

### 1215 **TABLES:**

#### 1216 **Table 1: Proteome and phosphoproteome coverage.**

1217 Summary of the identified, quantified and significantly changing diurnal proteins,  
1218 phosphopeptides and phosphoproteins. Quantification confidence thresholds are shown for the  
1219 proteome (proteins identified by  $\geq 2$  proteotypic peptides) and the phosphoproteome (site  
1220 probability score  $\geq 0.8$ ) quantified in  $\geq 3$  biological replicates for each time point of the diurnal  
1221 cycle and for each of the three time-points at the L-D and D-L transitions. The significance  
1222 thresholds are shown for the proteome (FC  $\geq 1.5$ ; ANOVA P value  $\leq 0.05$ ) and the  
1223 phosphoproteome (ANOVA P value  $\leq 0.05$ ). Application of proteome and phosphoproteome  
1224 significance thresholds are denoted by a single (\*) and double (\*\*) asterisks, respectively.

#### 1225 **Table 2: GSEA of significantly changing phosphoproteins at the D-L and L-D transition.**

1226 GSEA was performed using SetRank (P value  $\leq 0.01$ ; FDR  $\leq 0.05$ , minProt = 2).

#### 1227 **Table 3: Proteins involved in plant cell processes with independent changes in abundance** 1228 **and/or phosphorylation.**

1229

### 1230 **SUPPORTING INFORMATION:**

#### 1231 **Supplemental Figures**

#### 1232 **Supplemental Figure 1: Schematic depiction of the experimental workflow.**

1233 The total proteome and phosphoproteome experimental workflow is shown in black and blue,  
1234 respectively. Light and dark boxes represent the 12 h light : 12 h dark photoperiod. The numbers  
1235 on top of the boxes represent the tissue harvest times for the total proteome analysis (Zeitgeber  
1236 time; ZT). The numbers below the boxes represent the tissue harvest times for the  
1237 phosphoproteome analysis (minutes before or after a transition from L-D and D-L).

## Diurnal Arabidopsis proteome dynamics

### 1238 **Supplemental Figure 2: Hierarchical heatmap of significantly changing diurnal** 1239 **phosphopeptides at the D-L transition.**

1240 The hierarchical heatmap was generated using the R package Pheatmap and Euclidean distance.  
1241 Standardized relative log<sub>2</sub> FC in phosphopeptide abundance is shown along with the  
1242 corresponding AGI and phosphopeptide with phosphorylation site probabilities. GO terms of  
1243 proteins in the heatmap clusters are shown on the right together with their predicted subcellular  
1244 localization (SUBAcon). The segments of the circles represent the nucleus (red), cytosol (orange),  
1245 plastid (green), mitochondria (blue), plasma membrane (purple) and other (black) localizations.  
1246 The numbers below each pie chart represent the unique protein identifications. The time points of  
1247 sampling for phosphoprotein analysis were 30 min before light (BL30), 10 min after light (AL10)  
1248 and 30 min after light (AL30).

### 1249 **Supplemental Figure 3: Hierarchical heat map of significantly changing diurnal** 1250 **phosphopeptides at the L-D transition.**

1251 The hierarchical heat map was generated using the R package Pheatmap and Euclidean distance.  
1252 Standardized relative log<sub>2</sub> FC in phosphopeptide abundance is shown along with the  
1253 corresponding AGI and phosphopeptide with phosphorylation site probabilities. GO terms of  
1254 proteins in the heatmap clusters are shown on the right together with their predicted subcellular  
1255 localization (SUBAcon). The segments of the circles represent the nucleus (red), cytosol (orange),  
1256 plastid (green), mitochondria (blue), plasma membrane (purple) and other (black) localizations.  
1257 The numbers below each pie chart represent the number of unique protein identifications. The time  
1258 points of sampling for phosphoprotein analysis were 30 min before dark (BD30), 10 min after dark  
1259 (AD10) and 30 min after dark (AD30).

### 1260 **Supplemental Figure 4: Diurnal phosphorylation of nitrate reductase 1 (NIA1) and 2 (NIA2).**

1261 (A-B) Diurnal fluctuations of NIA1 and 2 mRNA and protein levels, and phosphorylation status.  
1262 Relative changes in mRNA and protein levels were assessed over 24 h. Transcript data was  
1263 extracted from Diurnal DB (<http://diurnal.mocklerlab.org/>). Relative changes in protein  
1264 phosphorylation were measured at the D-L and L-D transitions only (see Materials and Methods).  
1265 (C) Model of NIA2 protein structure including molybdenum cofactor (MoCo), dimerization  
1266 (Dimer), cytochrome b5 (Cyt B), FAD and NADH binding domains in addition to hinge regions 1  
1267 and 2. Phosphorylation of the three annotated phosphorylation sites in NIA2 shown as circles is

## Diurnal Arabidopsis proteome dynamics

1268 light-dependent (yellow), dark-dependent (blue) and nitric oxide-induced (white; Wang et al;  
1269 2011).

1270

### 1271 **Supplemental Tables**

1272 Supplemental Table 1: All identified and quantified proteins.

1273 Supplemental Table 2: Significantly changing diurnal proteins.

1274 Supplemental Table 3: All identified and quantified phosphoproteins.

1275 Supplemental Table 4: Significantly changing diurnal phosphoproteins.

1276 Supplemental Table 5: Benchmark phosphoproteins.

1277 Supplemental Table 6: Comparative proteome and phosphoproteome analysis.

1278 Supplemental Table 7: MotifX data for D-L and L-D transitions.

1279 Supplemental Table 8: Standardized D-L and L-D changes in the phosphorylation of protein  
1280 translation.

1281 Supplemental Table 9: Standardized D-L and L-D transition phosphopeptide rates-of-change.

1282

### 1283 **Supplemental Data**

1284 Supplemental Data 1-6: The matched transcript and protein expression profiles for genes in  
1285 clusters 1 – 6 respectively in Figure 1.

1286 Supplemental Data 7: Comparison of changing diurnal proteome and a circadian proteome  
1287 reported by Kramer et al. (2019).

## Table I

### **Table I: Proteome and Phosphoproteome coverage.**

Summary of the identified, quantified and significantly changing diurnal proteins, phosphopeptides and phosphoproteins. Quantification confidence thresholds are shown for the proteome (proteins identified by  $\geq 2$  proteotypic peptides) and the phosphoproteome (site probability score  $\geq 0.8$ ) quantified in  $\geq 3$  biological replicates for each time point of the diurnal cycle and for each of the three time-points at the L-D and D-L transitions. The significance thresholds are shown for the proteome (FC  $\geq 1.5$ ; ANOVA P value  $\leq 0.05$ ) and the phosphoproteome (ANOVA P value  $\leq 0.05$ ). Application of proteome and phosphoproteome significance thresholds are denoted by a single (\*) and double (\*\*) asterisks, respectively.

|                        | Proteome | Phosphoproteome |
|------------------------|----------|-----------------|
| Protein IDs            | 7060     | 1091            |
| Peptide IDs            | n/a      | 1776            |
| Proteins Quantified    | 4762     | 725             |
| Peptides Quantified    | n/a      | 1056            |
| Sig. Changing Proteins | *288     | **226           |
| Sig. Changing Peptides | n/a      | **271           |



## Table II

**Table II: GSEA of significantly changing phosphoproteins at the D-L and L-D transition.** GSEA was performed using SetRank (corr P value  $\leq 0.01$ ; FDR  $\leq 0.05$ , minProt = 2).

| <b>D-L Transition</b> |                                             |                 |             |                |                     |
|-----------------------|---------------------------------------------|-----------------|-------------|----------------|---------------------|
| <b>Name</b>           | <b>Description</b>                          | <b>Database</b> | <b>Size</b> | <b>SetRank</b> | <b>Corr P value</b> |
| GO:0016020            | membrane                                    | GOCC            | 273         | 0.125972       | 0.000913639         |
| GO:0005524            | ATP binding                                 | GOMF            | 104         | 0.110291       | 0.006818059         |
| GO:0009416            | response to light stimulus                  | GOBP            | 32          | 0.059617       | 0.000197647         |
| M00428                | eIF4F complex                               | KEGG            | 4           | 0.032225       | 0.000207554         |
| GO:0005618            | cell wall                                   | GOCC            | 20          | 0.059617       | 0.000666835         |
| GO:0009941            | chloroplast envelope                        | GOCC            | 33          | 0.032225       | 0.000828511         |
| GO:0009785            | blue light signaling pathway                | GOBP            | 2           | 0.032225       | 0.001166915         |
| GO:0016310            | phosphorylation                             | GOBP            | 60          | 0.032225       | 0.001933236         |
| GO:0046527            | glucosyltransferase activity                | GOMF            | 5           | 0.032225       | 0.007552696         |
| GO:0015291            | transmembrane transporter activity          | GOMF            | 9           | 0.032225       | 0.008195815         |
| GO:0048528            | post-embryonic root development             | GOBP            | 10          | 0.032225       | 0.004122321         |
| META_PWY-101          | photosynthesis light reactions              | BIOCYC          | 3           | 0.032225       | 0.004299686         |
| GO:0009523            | photosystem II                              | GOCC            | 2           | 0.032225       | 0.004363247         |
| GO:0009555            | pollen development                          | GOBP            | 6           | 0.032225       | 0.005631461         |
| GO:1902580            | single-organism cellular localization       | GOBP            | 12          | 0.032225       | 0.005682244         |
| ath04141              | Protein processing in endoplasmic reticulum | KEGG            | 5           | 0.032225       | 0.007587253         |
| GO:0050832            | defense response to fungus                  | GOBP            | 11          | 0.032225       | 0.007657975         |
| GO:0042126            | nitrate metabolic process                   | GOBP            | 5           | 0.032225       | 0.009137088         |
| GO:0003924            | GTPase activity                             | GOMF            | 6           | 0.032225       | 0.009196556         |
| <b>L-D Transition</b> |                                             |                 |             |                |                     |
| <b>Name</b>           | <b>Description</b>                          | <b>Database</b> | <b>Size</b> | <b>SetRank</b> | <b>Corr P value</b> |
| GO:0009507            | chloroplast                                 | GOCC            | 116         | 0.130435       | 0.000316305         |
| GO:0009108            | coenzyme biosynthetic process               | GOBP            | 3           | 0.048309       | 0.002527376         |
| GO:0016903            | oxidoreductase activity                     | GOMF            | 4           | 0.048309       | 0.005222496         |
| GO:0005829            | cytosol                                     | GOCC            | 213         | 0.048309       | 0.007059263         |
| GO:0016310            | phosphorylation                             | GOBP            | 52          | 0.048309       | 0.009610197         |
| GO:0006997            | nucleus organization                        | GOBP            | 3           | 0.048309       | 0.000925019         |
| GO:0009637            | response to blue light                      | GOBP            | 9           | 0.048309       | 0.001227825         |
| GO:0009573            | RuBisCO complex                             | GOCC            | 2           | 0.048309       | 0.00637449          |
| GO:0009785            | blue light signaling pathway                | GOBP            | 2           | 0.048309       | 0.006496782         |
| GO:0010359            | regulation of anion channel activity        | GOBP            | 2           | 0.048309       | 0.006496782         |
| GO:0009416            | response to light stimulus                  | GOBP            | 31          | 0.048309       | 0.008163336         |
| GO:0016192            | vesicle-mediated transport                  | GOBP            | 31          | 0.048309       | 0.002856364         |
| GO:0090407            | organophosphate biosynthetic process        | GOBP            | 11          | 0.048309       | 0.003001091         |
| GO:0097306            | cellular response to alcohol                | GOBP            | 11          | 0.048309       | 0.004964197         |
| GO:0003924            | GTPase activity                             | GOMF            | 6           | 0.048309       | 0.006375452         |
| GO:0071365            | cellular response to auxin stimulus         | GOBP            | 8           | 0.048309       | 0.008146711         |

**Table III****Table III: Proteins involved in plant cell processes with independent changes in abundance and/or phosphorylation.**

| <b>Biological Process</b>       | <b>AGI</b> | <b>Name</b>               | <b>Description</b>                                   | <b>Abundance (A) / Phosphorylation (P)</b> |
|---------------------------------|------------|---------------------------|------------------------------------------------------|--------------------------------------------|
| Translation                     | AT5G54940  | eIF1                      | Translation initiation factor SU11 family protein    | A                                          |
|                                 | AT1G72340  | eIF2Bc-a                  | NagB/RpiA/CoA transferase-like superfamily protein   | A                                          |
|                                 | AT1G27400  | RPL17A                    | Ribosomal protein L22p/L17e family protein           | A                                          |
|                                 | AT1G33120  | RPL9B                     | Ribosomal protein L6 family                          | A                                          |
|                                 | AT4G10450  | RPL9D                     | Ribosomal protein L6 family                          | A                                          |
|                                 | AT1G77940  | RPL30B                    | Ribosomal protein L7Ae/L30e/S12e/Gadd45 family       | A                                          |
|                                 | AT3G45030  | RPS20A                    | Ribosomal protein S10p/S20e family protein           | A                                          |
|                                 | AT5G64140  | RPS28C                    | Ribosomal protein S28                                | A                                          |
|                                 | AT3G02560  | RPS7B                     | Ribosomal protein S7e family protein                 | A                                          |
|                                 | AT1G25260  |                           | Ribosomal protein L10 family protein                 | A                                          |
|                                 | AT5G24490  | mito30S                   | 30S ribosomal protein                                | A                                          |
|                                 | AT1G07830  | mitoL29                   | Ribosomal protein L29 family protein                 | A                                          |
|                                 | AT4G11120  | mitoEF-Ts                 | Translation elongation factor Ts (EF-Ts)             | A                                          |
|                                 | AT3G08740  | chloroEF-P                | Elongation factor P (EF-P) family protein            | A                                          |
|                                 | AT5G54600  | chloroL24                 | Translation protein SH3-like family protein          | A                                          |
|                                 | AT1G13020  | eIF4B                     | Eukaryotic initiation factor 4B2                     | P                                          |
|                                 | AT3G13920  | eIF4A                     | Eukaryotic translation initiation factor 4A1         | P                                          |
|                                 | AT5G38640  | eIF2Bc-d                  | NagB/RpiA/CoA transferase-like superfamily protein   | P                                          |
|                                 | AT3G13920  | eIF4A                     | Eukaryotic translation initiation factor 4A1         | P                                          |
|                                 | AT4G20980  | eIF3-d                    | Eukaryotic translation initiation factor 3 subunit 7 | P                                          |
| AT4G31700                       | RPS6A      | Ribosomal protein S6      | P                                                    |                                            |
| AT5G10360                       | RPS6B      | Ribosomal protein S6e     | P                                                    |                                            |
| AT2G23350                       | PABP       | Poly(A) binding protein 4 | P                                                    |                                            |
| Fatty Acid & Lipid Biosynthesis | AT2G33150  | KAT2/PKT3                 | Peroxisomal 3-ketoacyl-CoA thiolase 3                | A                                          |
|                                 | AT3G15290  | MFP2/AIM1-like            | 3-hydroxyacyl-CoA dehydrogenase family protein       | A                                          |
| Primary Metabolism              | AT1G77760  | NIA1                      | Nitrate reductase 1                                  | P                                          |
|                                 | AT1G37130  | NIA2                      | Nitrate reductase 2                                  | P                                          |
|                                 | AT2G42600  | PEPC2                     | Phosphoenolpyruvate carboxylase 2                    | P                                          |
|                                 | AT3G14940  | PEPC3                     | Phosphoenolpyruvate carboxylase 3                    | P                                          |
|                                 | AT5G20280  | SPS1F                     | Sucrose phosphate synthase 1F                        | P                                          |
| Carbohydrate Metabolism         | AT1G32900  | GBSS1                     | Granule bound starch synthase 1                      | A                                          |
|                                 | AT5G19220  | ADG2                      | ADP glucose pyrophosphorylase                        | A                                          |
|                                 | AT1G03310  | DBE1                      | Debranching enzyme 1                                 | A                                          |
|                                 | AT3G23920  | BAM1                      | Beta-amylase 1                                       | P                                          |
| Cell wall                       | AT5G09870  | CESA5                     | Cellulose synthase 5                                 | P                                          |
|                                 | AT3G07330  | CSLC6                     | Cellulose-synthase-like C6                           | P                                          |
|                                 | AT2G18960  | HA1                       | H <sup>+</sup> -ATPase 1                             | P                                          |

**Figure 1**

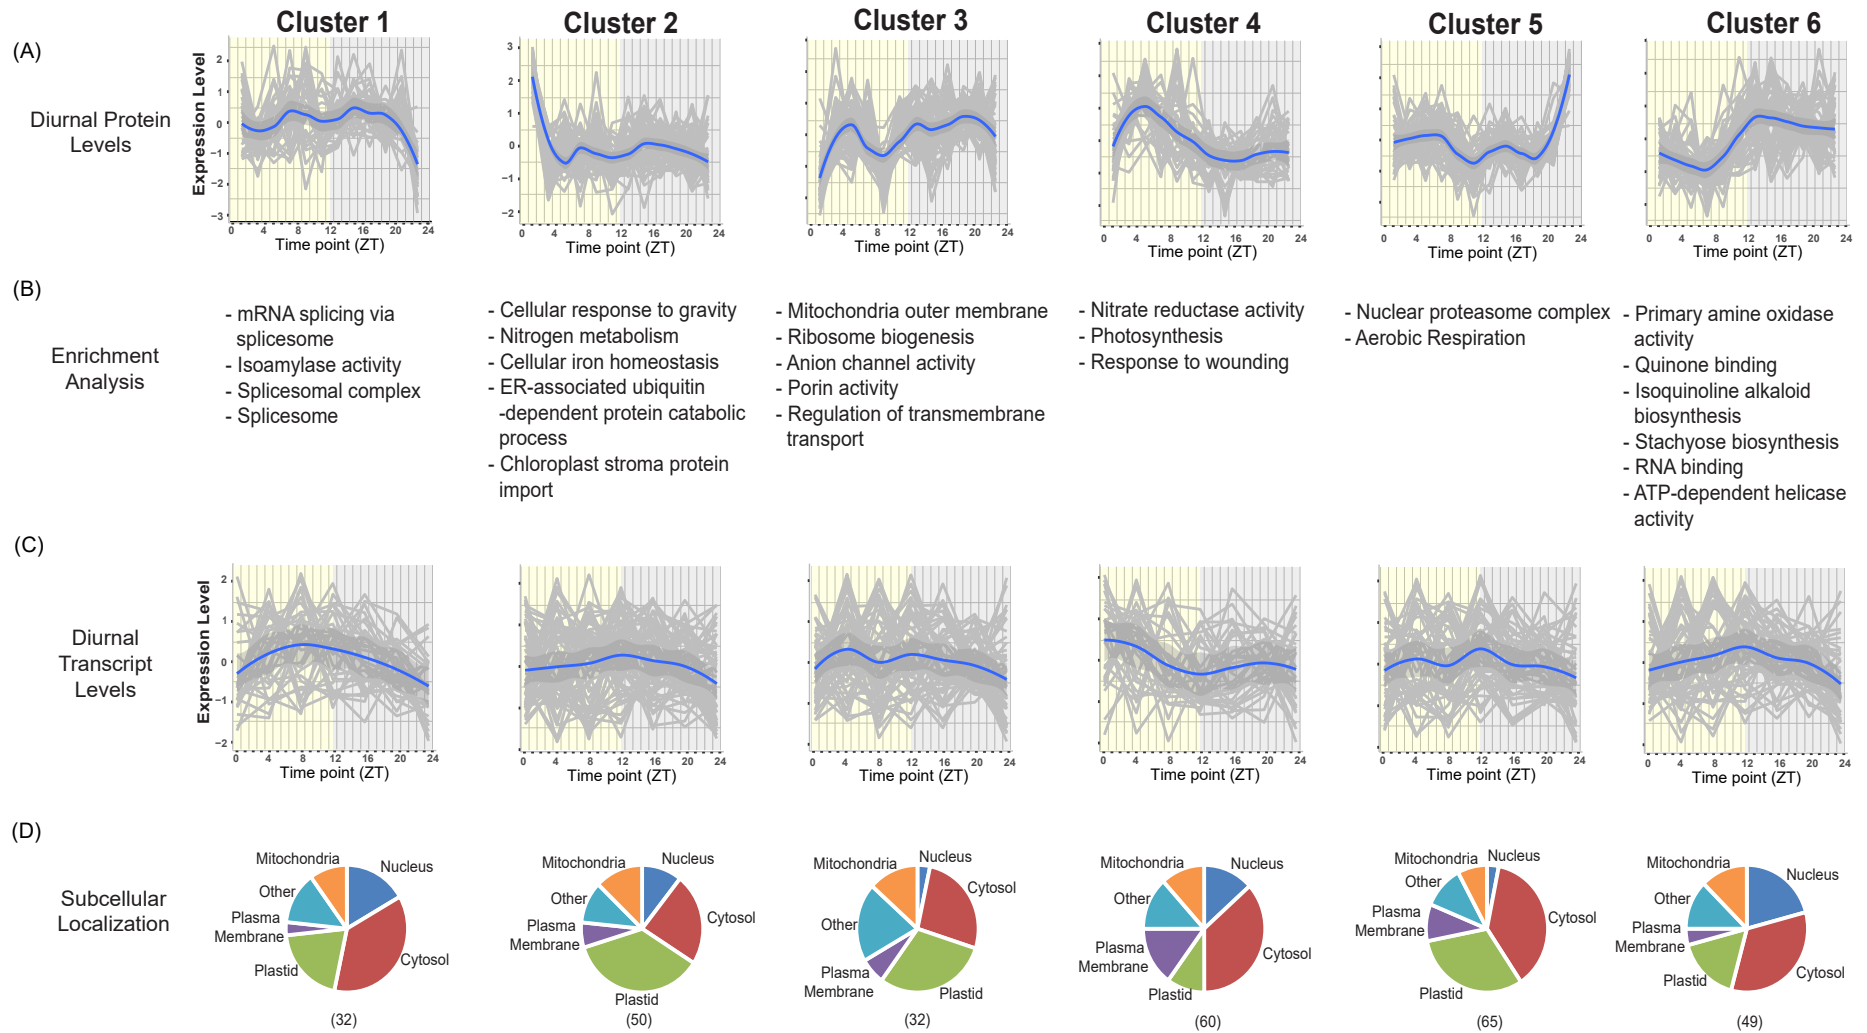

**Figure 1: Analysis of the diurnal proteome: clustering, enrichment analysis and subcellular localization.** (A) Significantly changing proteins ( $FC \geq 1.5$ , ANOVA  $P$  value  $\leq 0.05$ ,  $\geq 2$  peptides) were subjected to an unsupervised clustering analysis (GProX; <http://gprox.sourceforge.net>) resolving 6 protein clusters. Y- and X-axis depict standardized expression level and harvest time (Zeitgeber time; ZT), respectively. Median expression is depicted in blue. (B) Term enrichment analysis of significantly changing proteins using SetRank ( $P$  value  $\leq 0.01$ , size  $\geq 2$ ). (C) Standardized diurnal transcript expression level of each corresponding clustered protein (Log10). Median expression is depicted in blue. Transcript expression level was obtained from Diurnal DB (<http://diurnal.mockler-lab.org/>). (D) In silico subcellular localization analysis of significantly changing proteins using SUBAcon (SUBA3; <http://suba3.plantenergy.uwa.edu.au>). Bracketed numbers represent the number of proteins per cluster.

Figure 2

Cluster 1

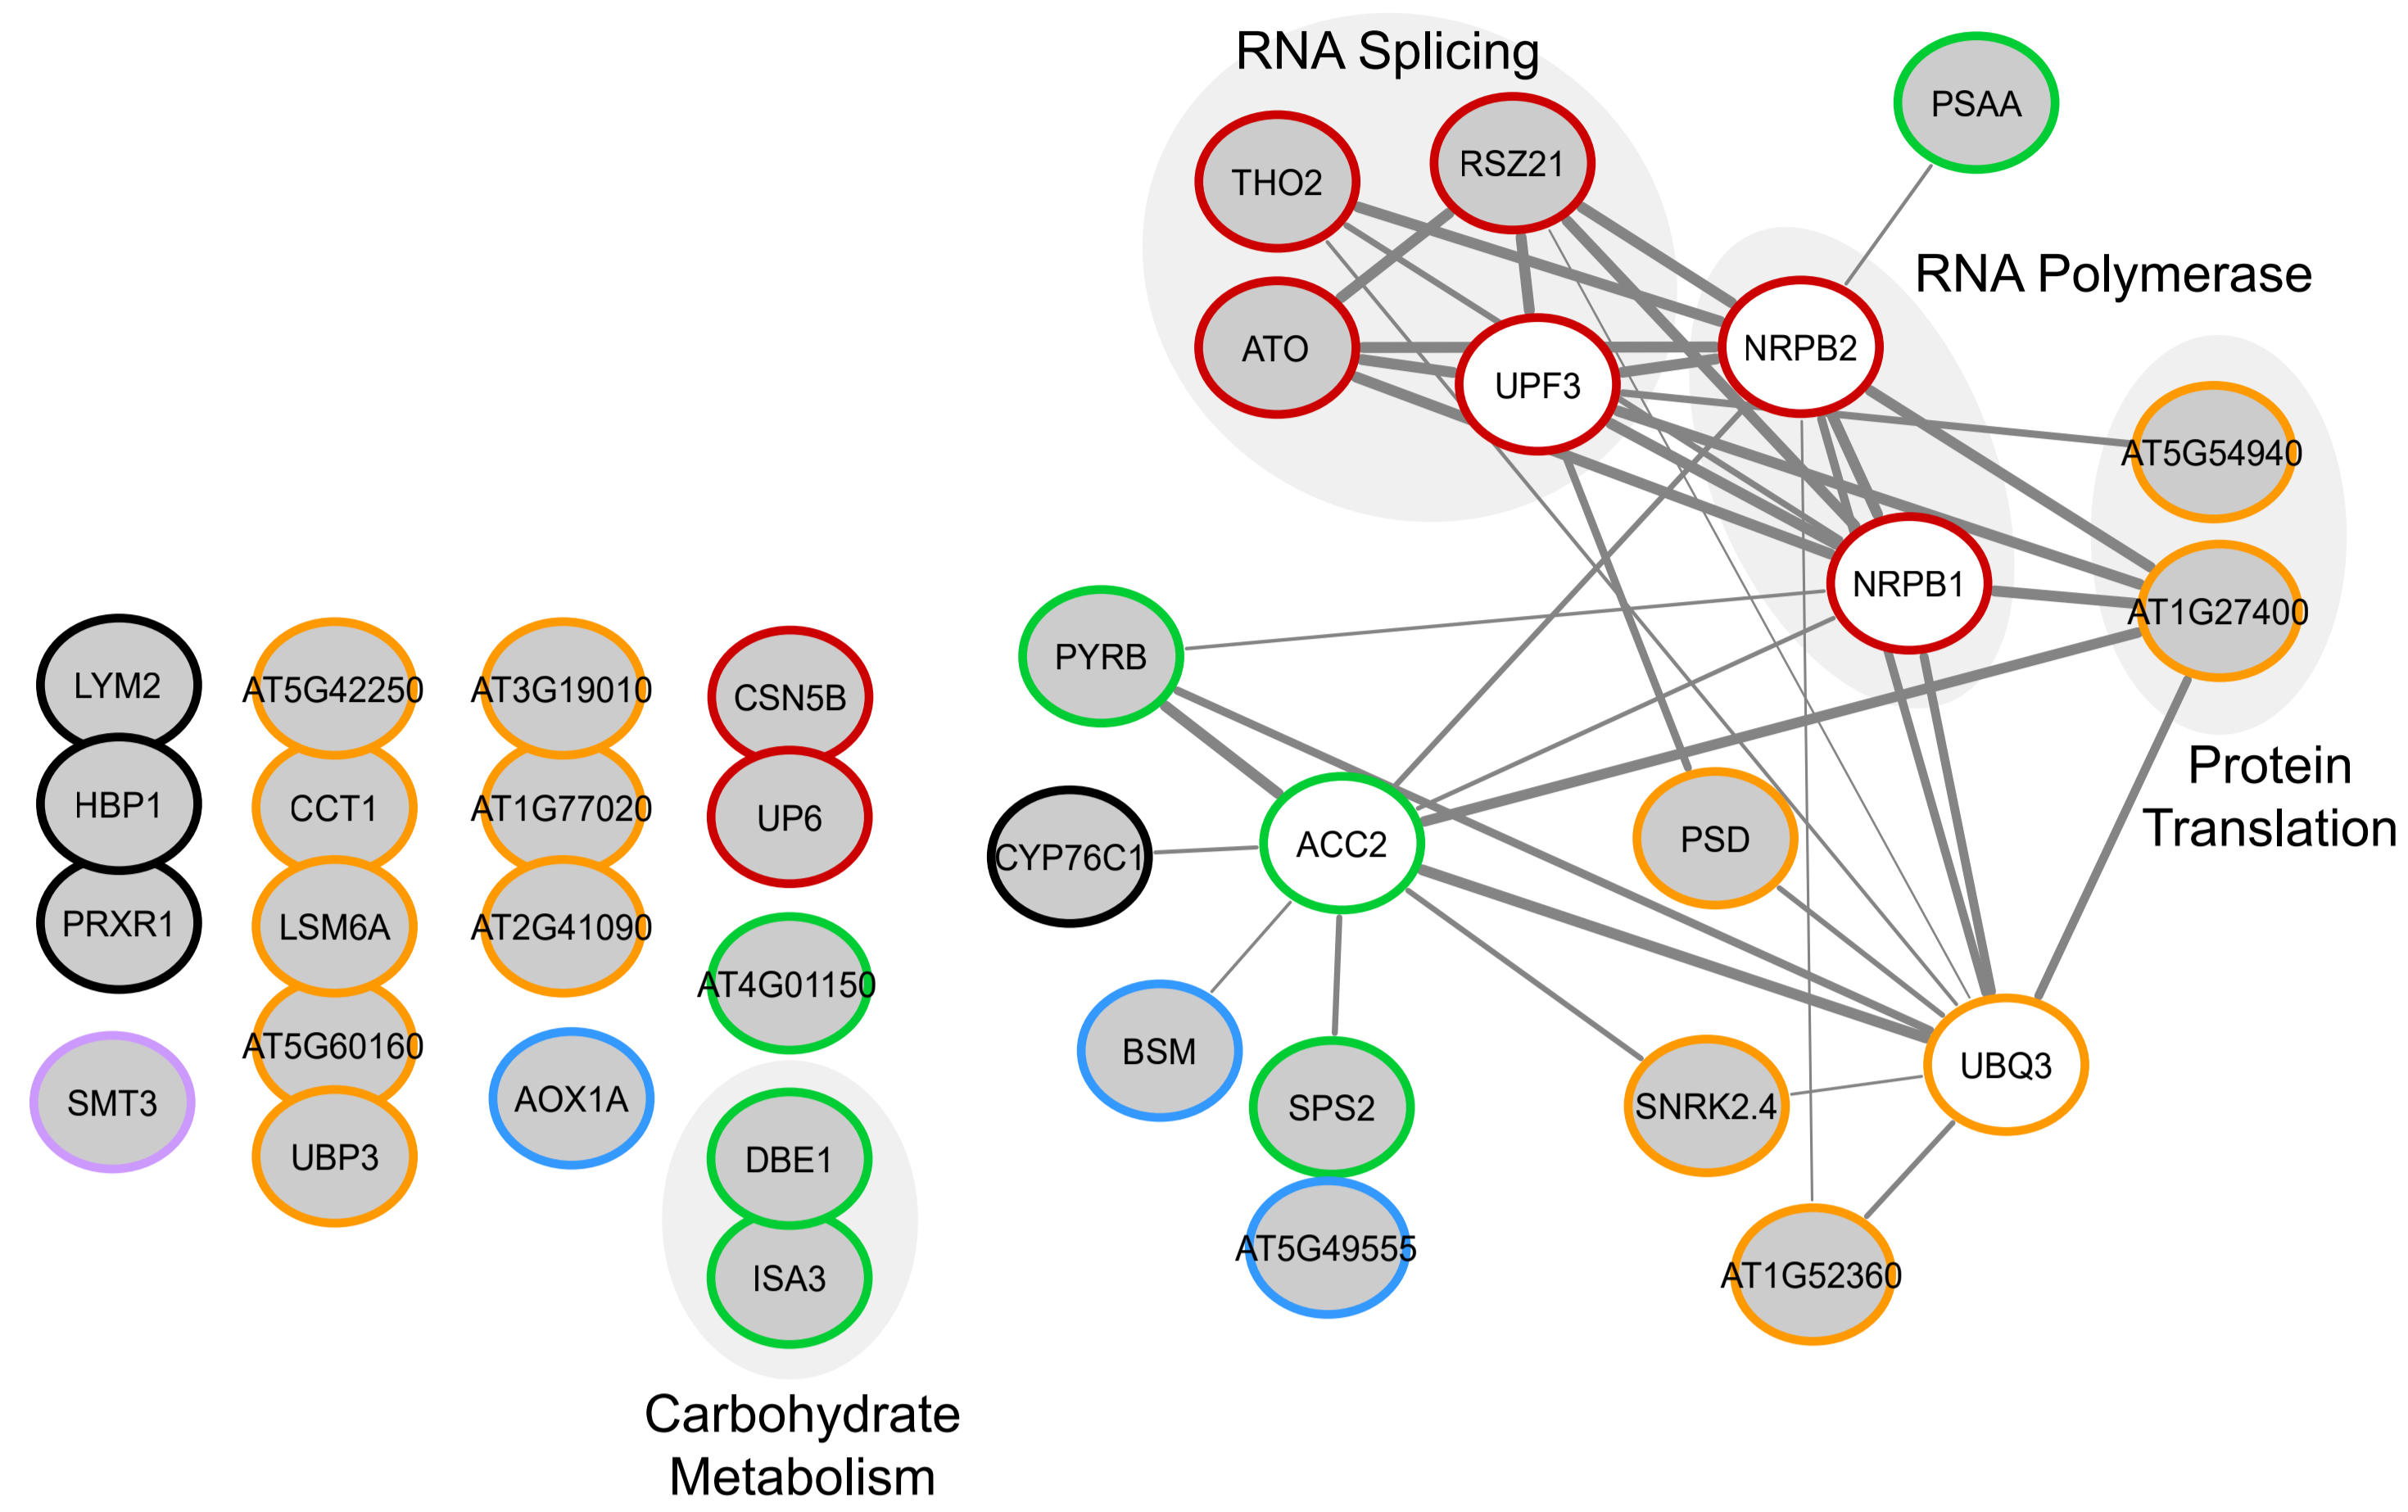

Cluster 2

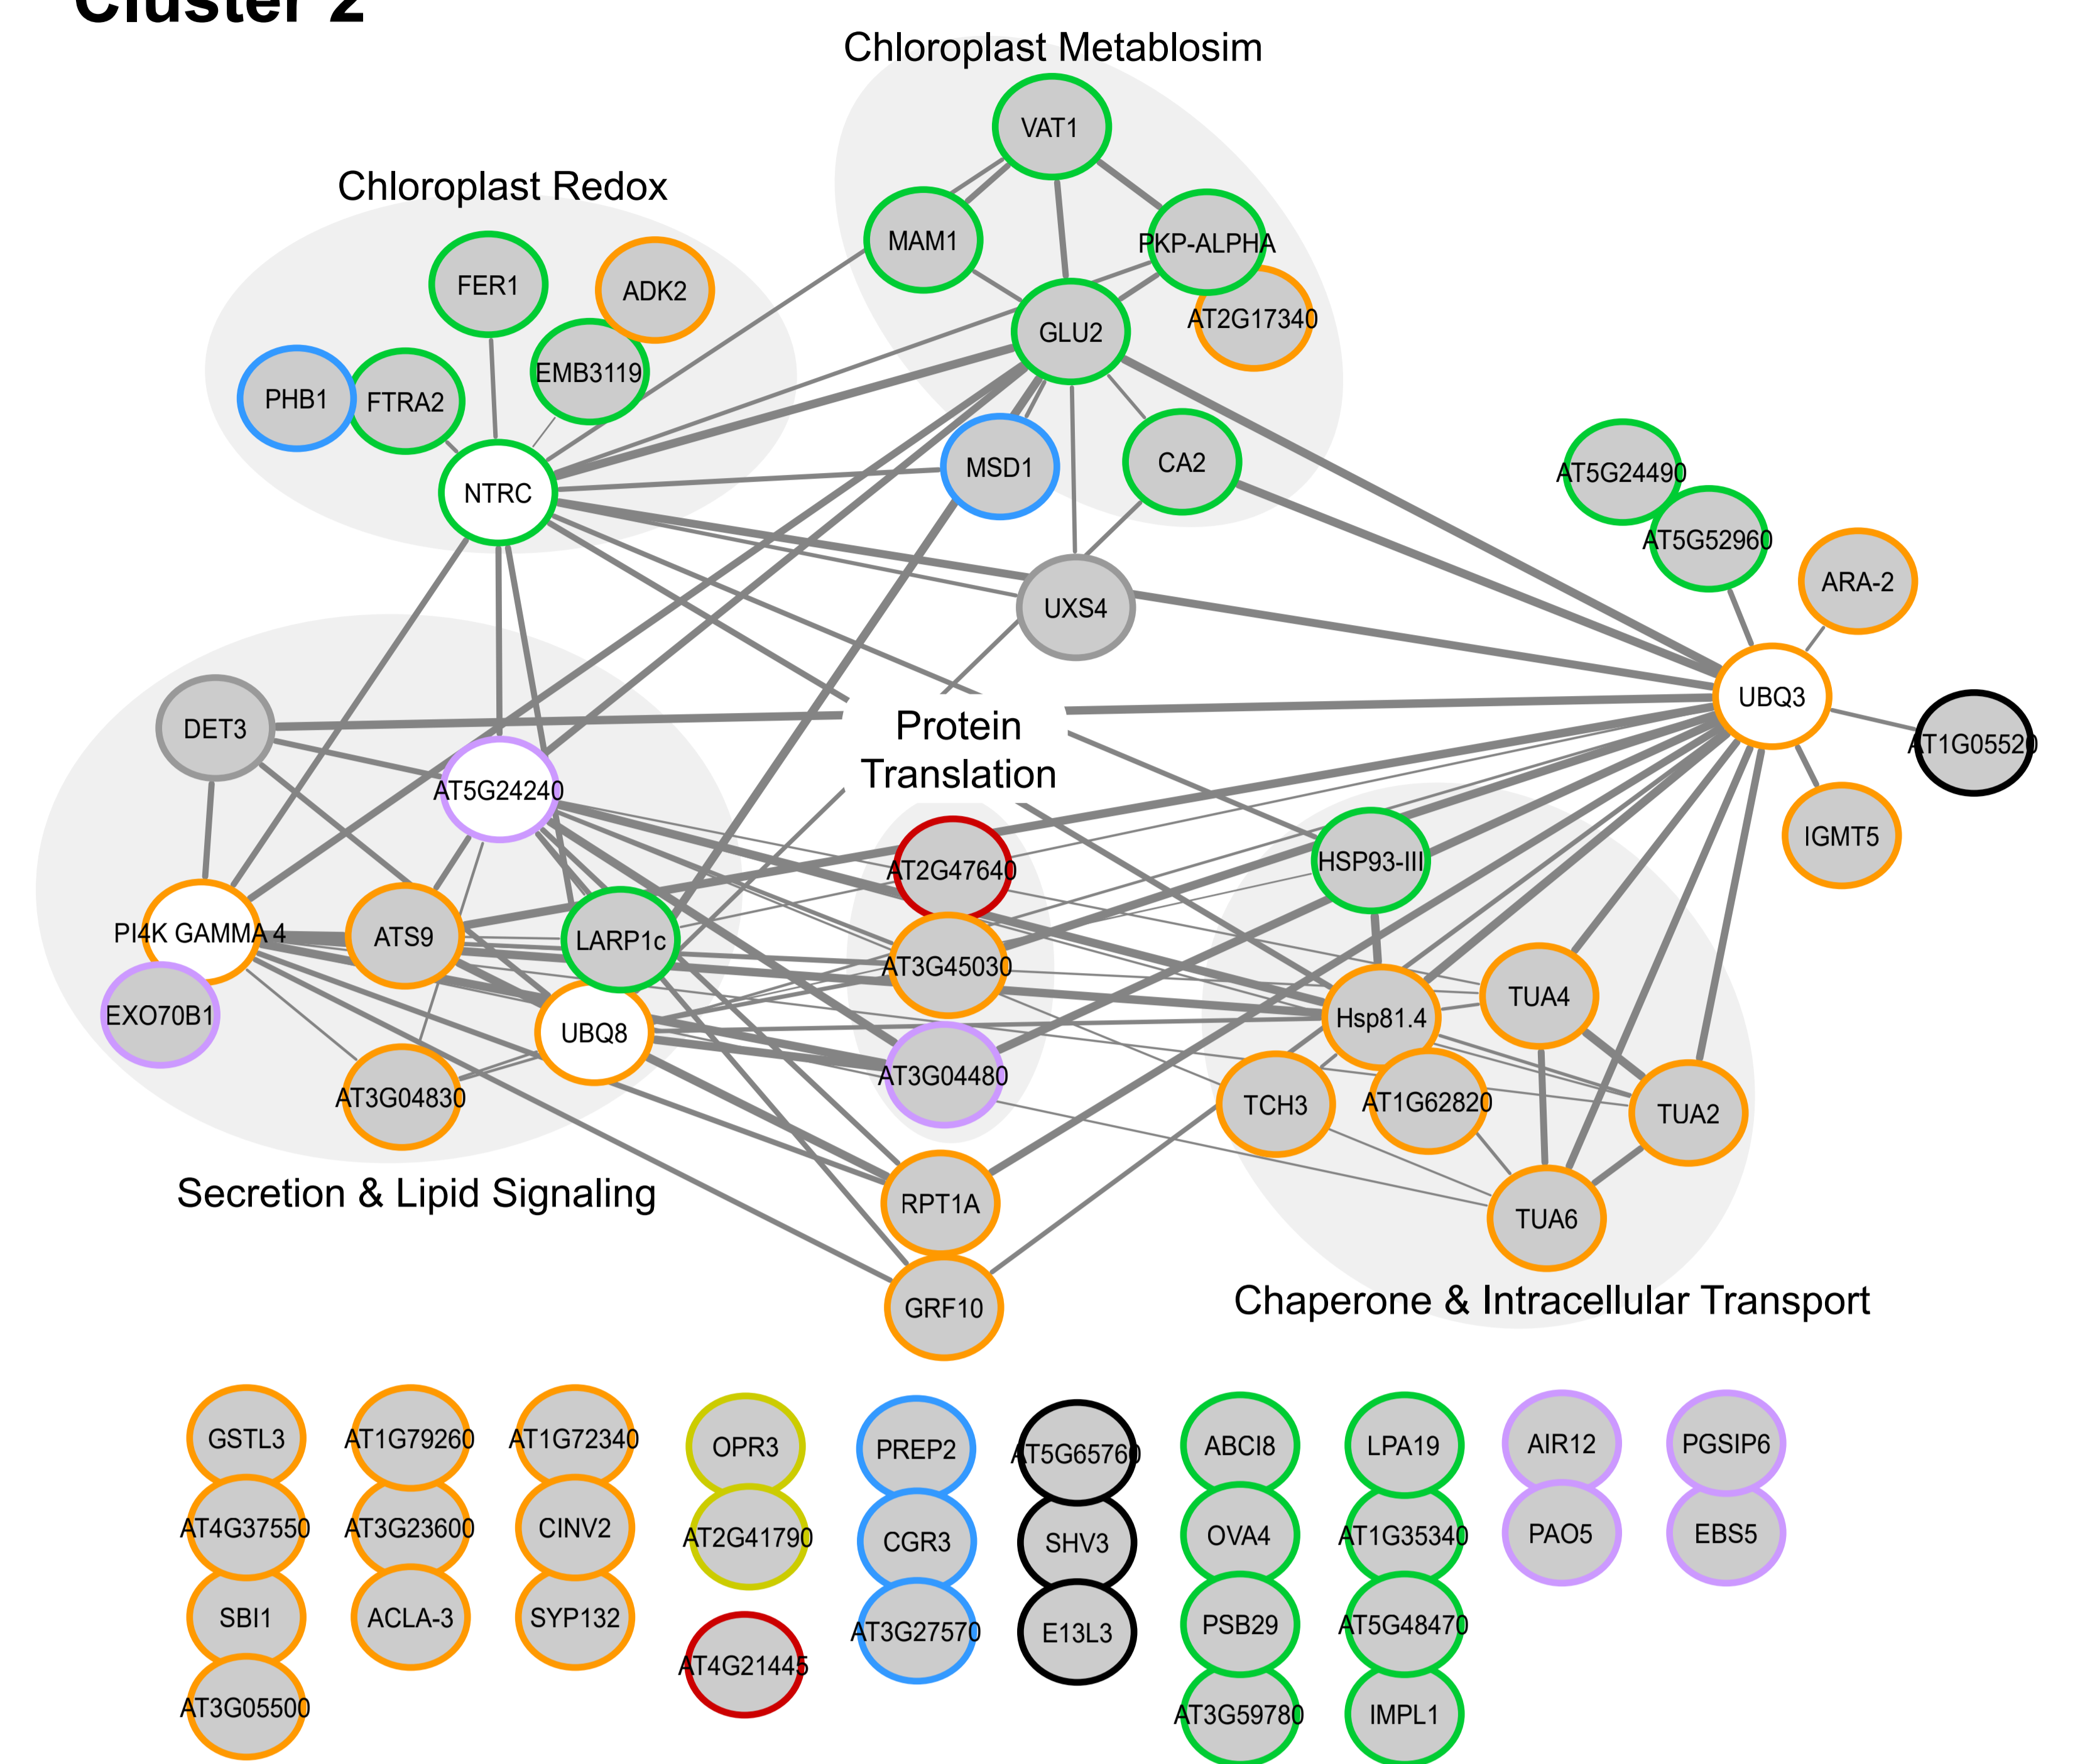

Cluster 3

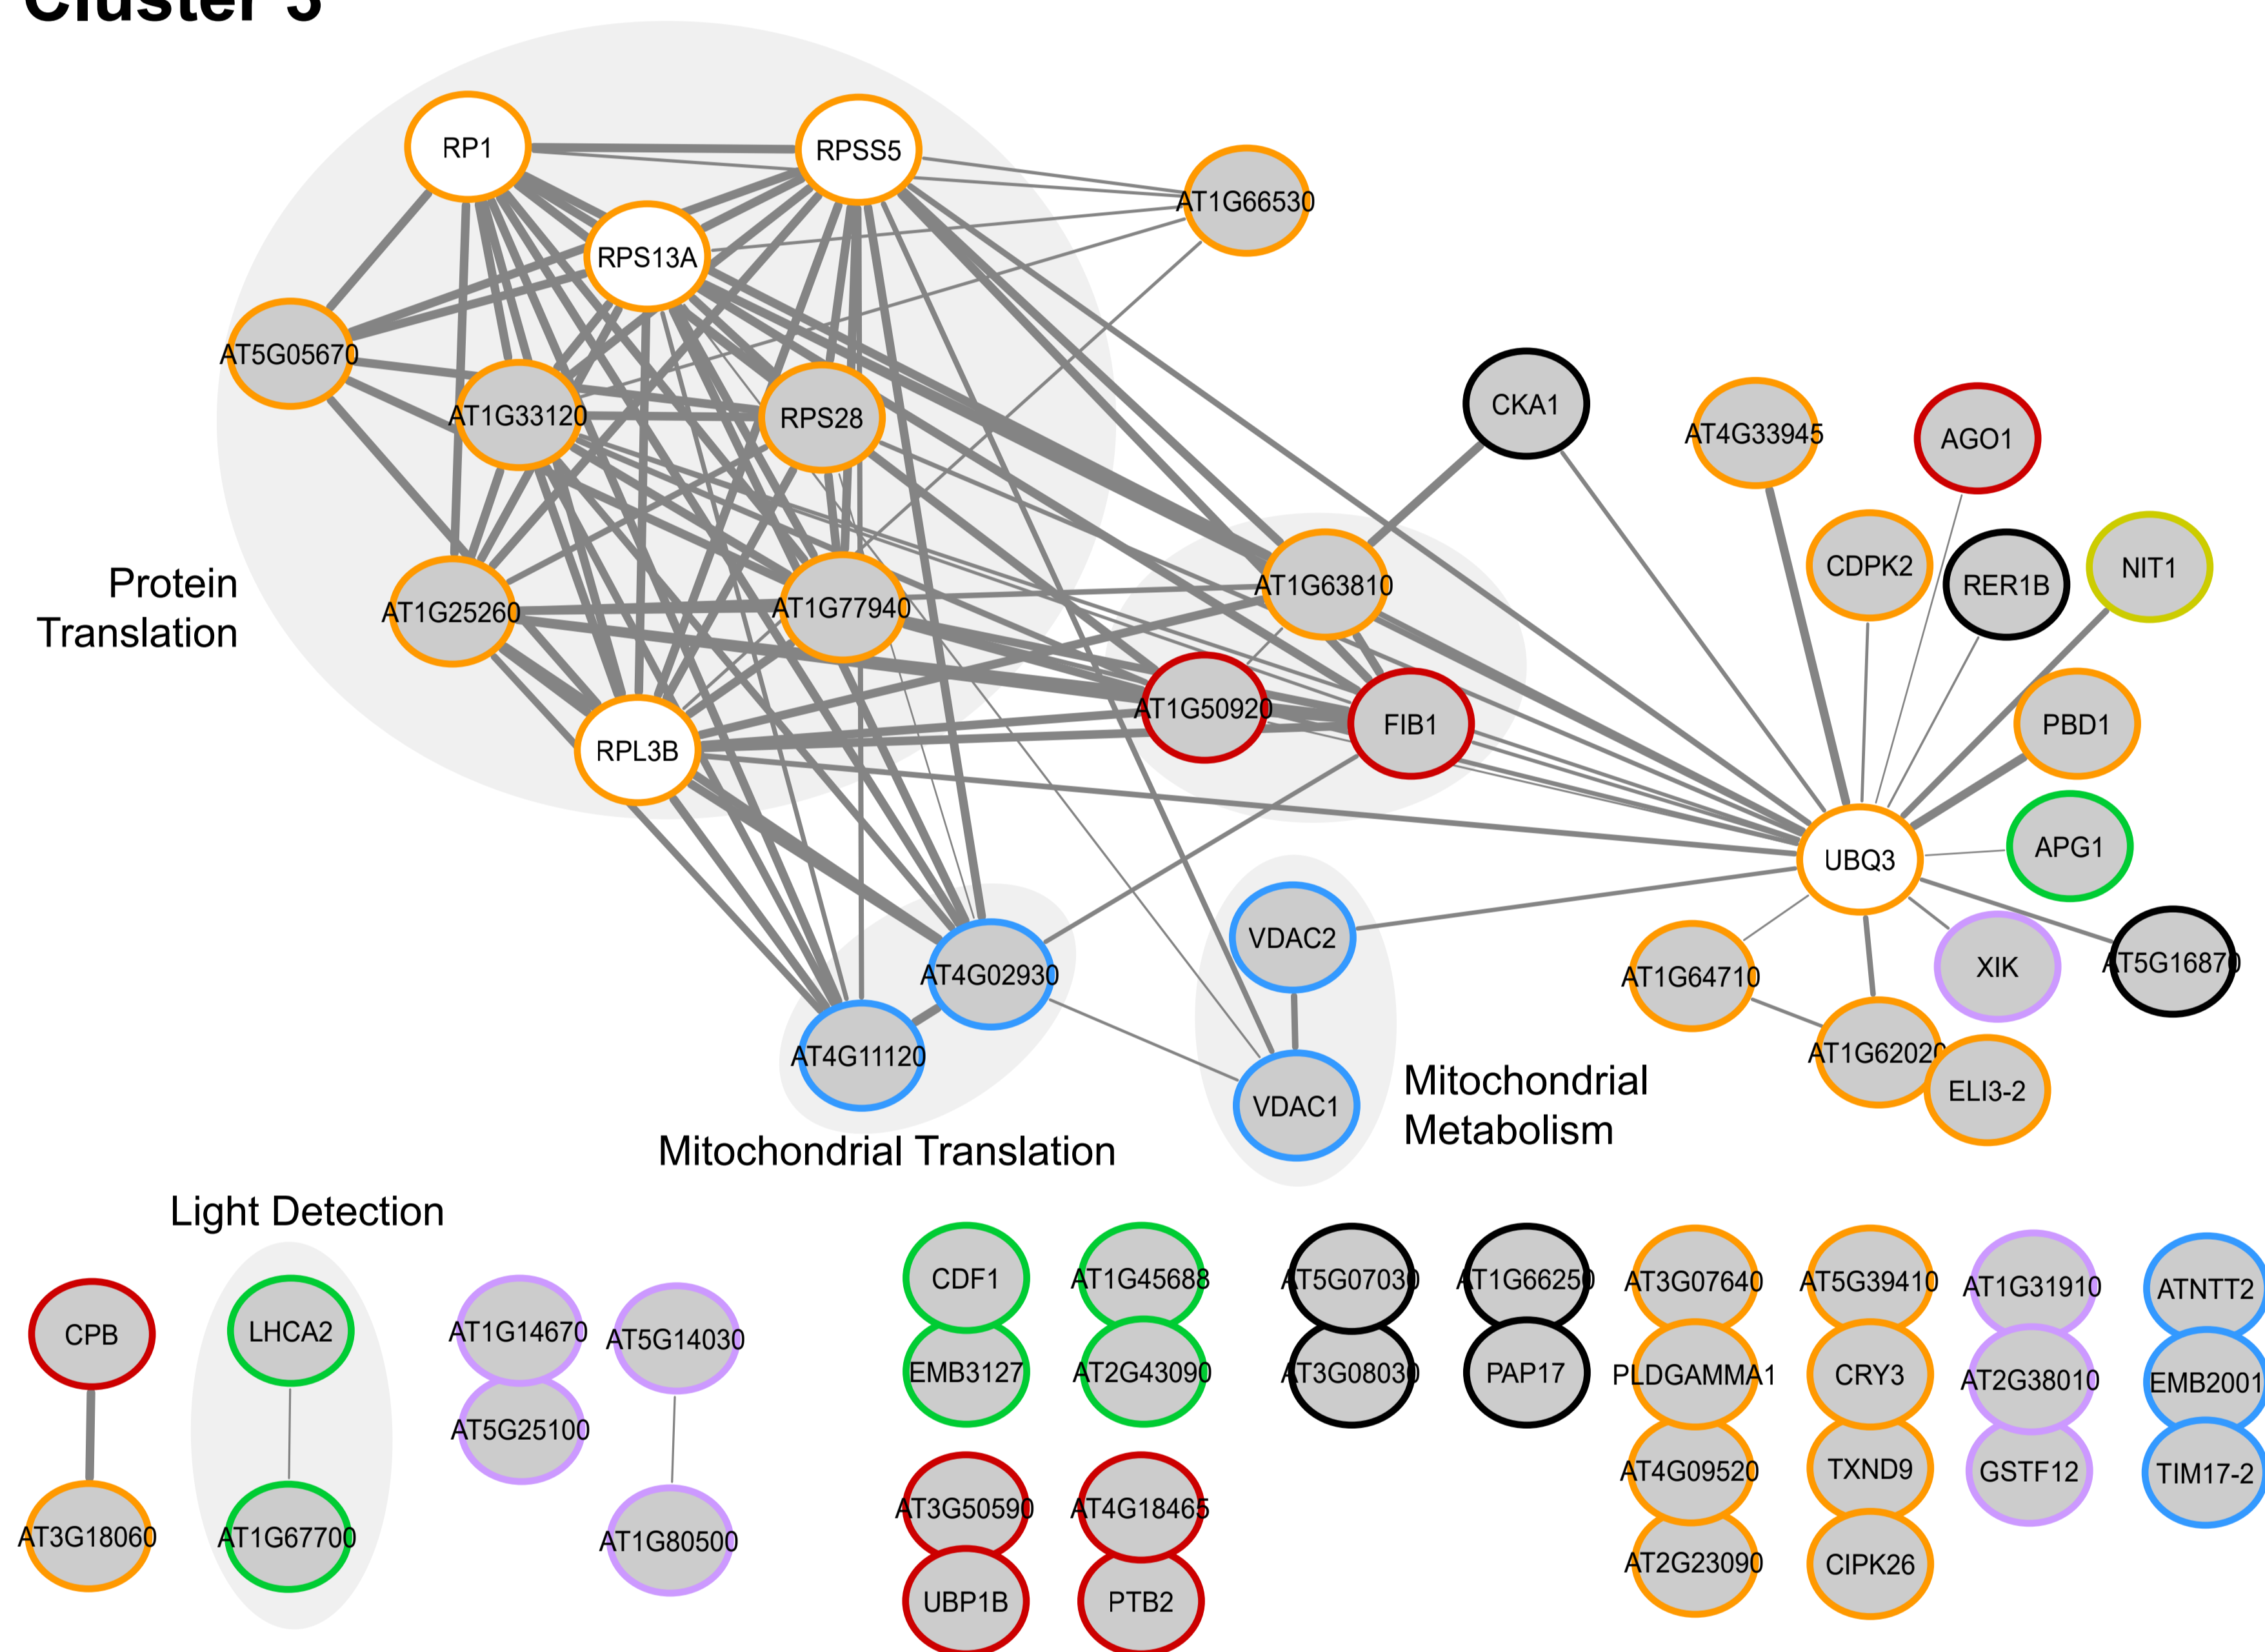

Cluster 4

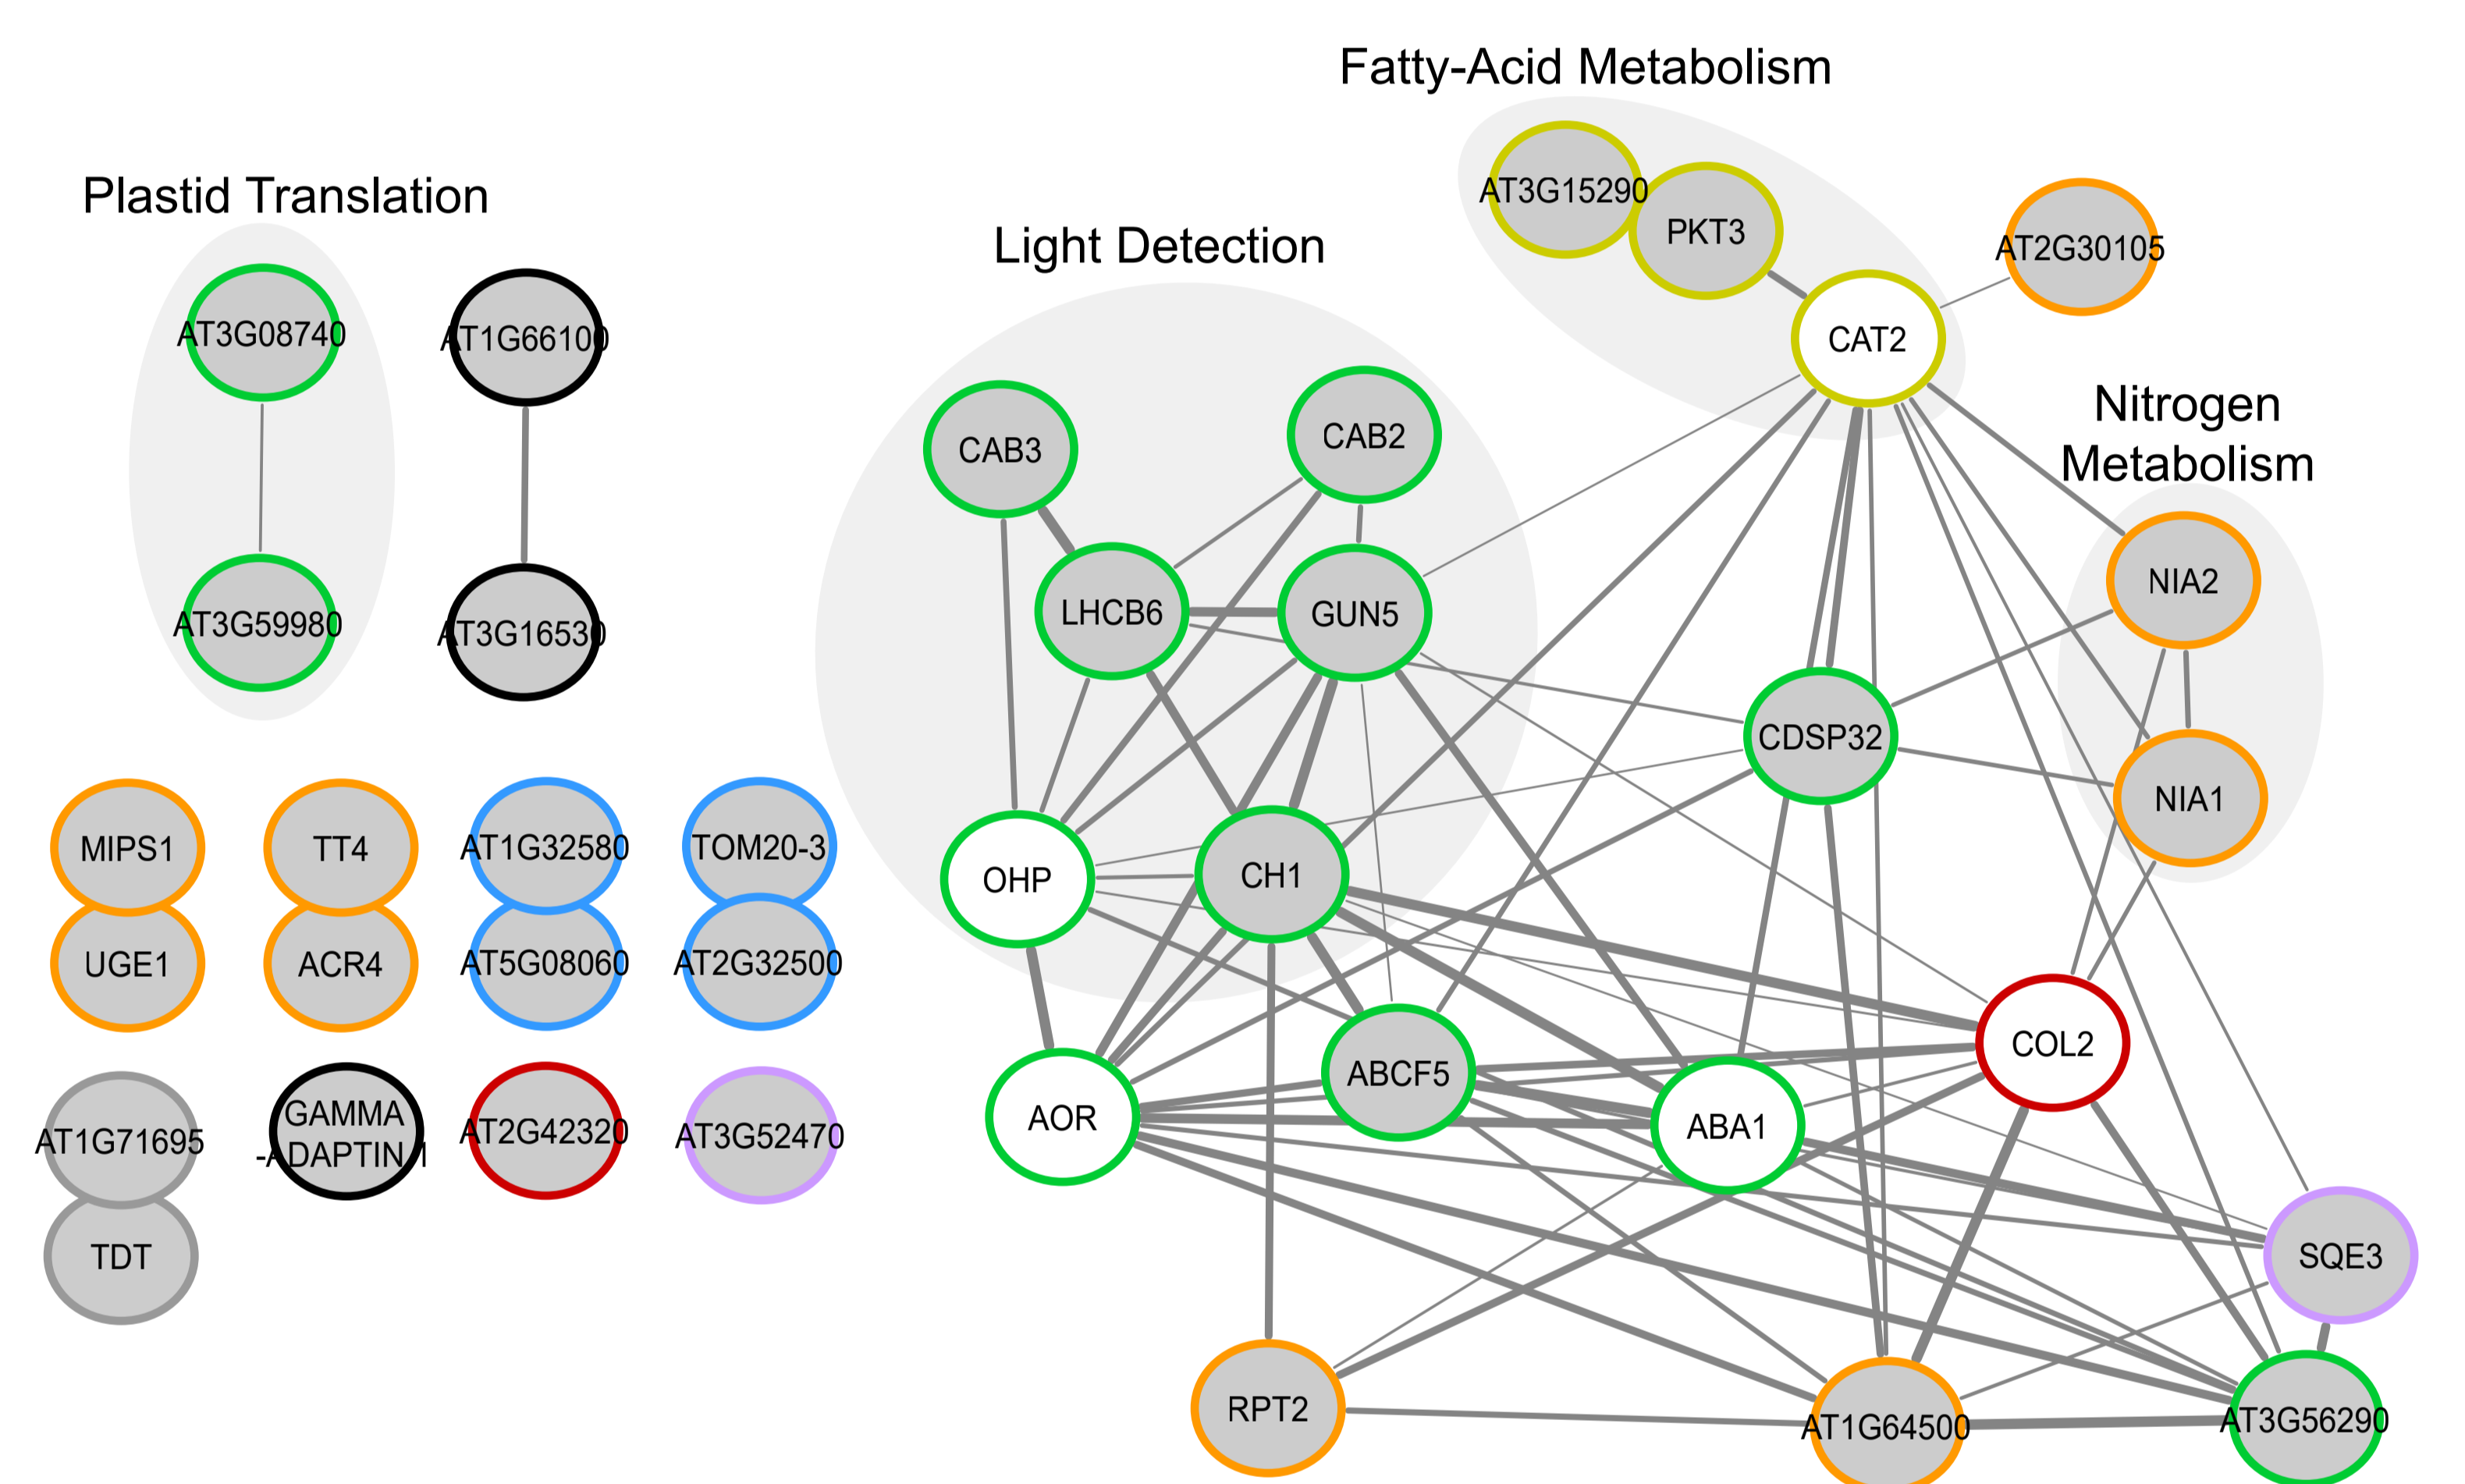

Cluster 5

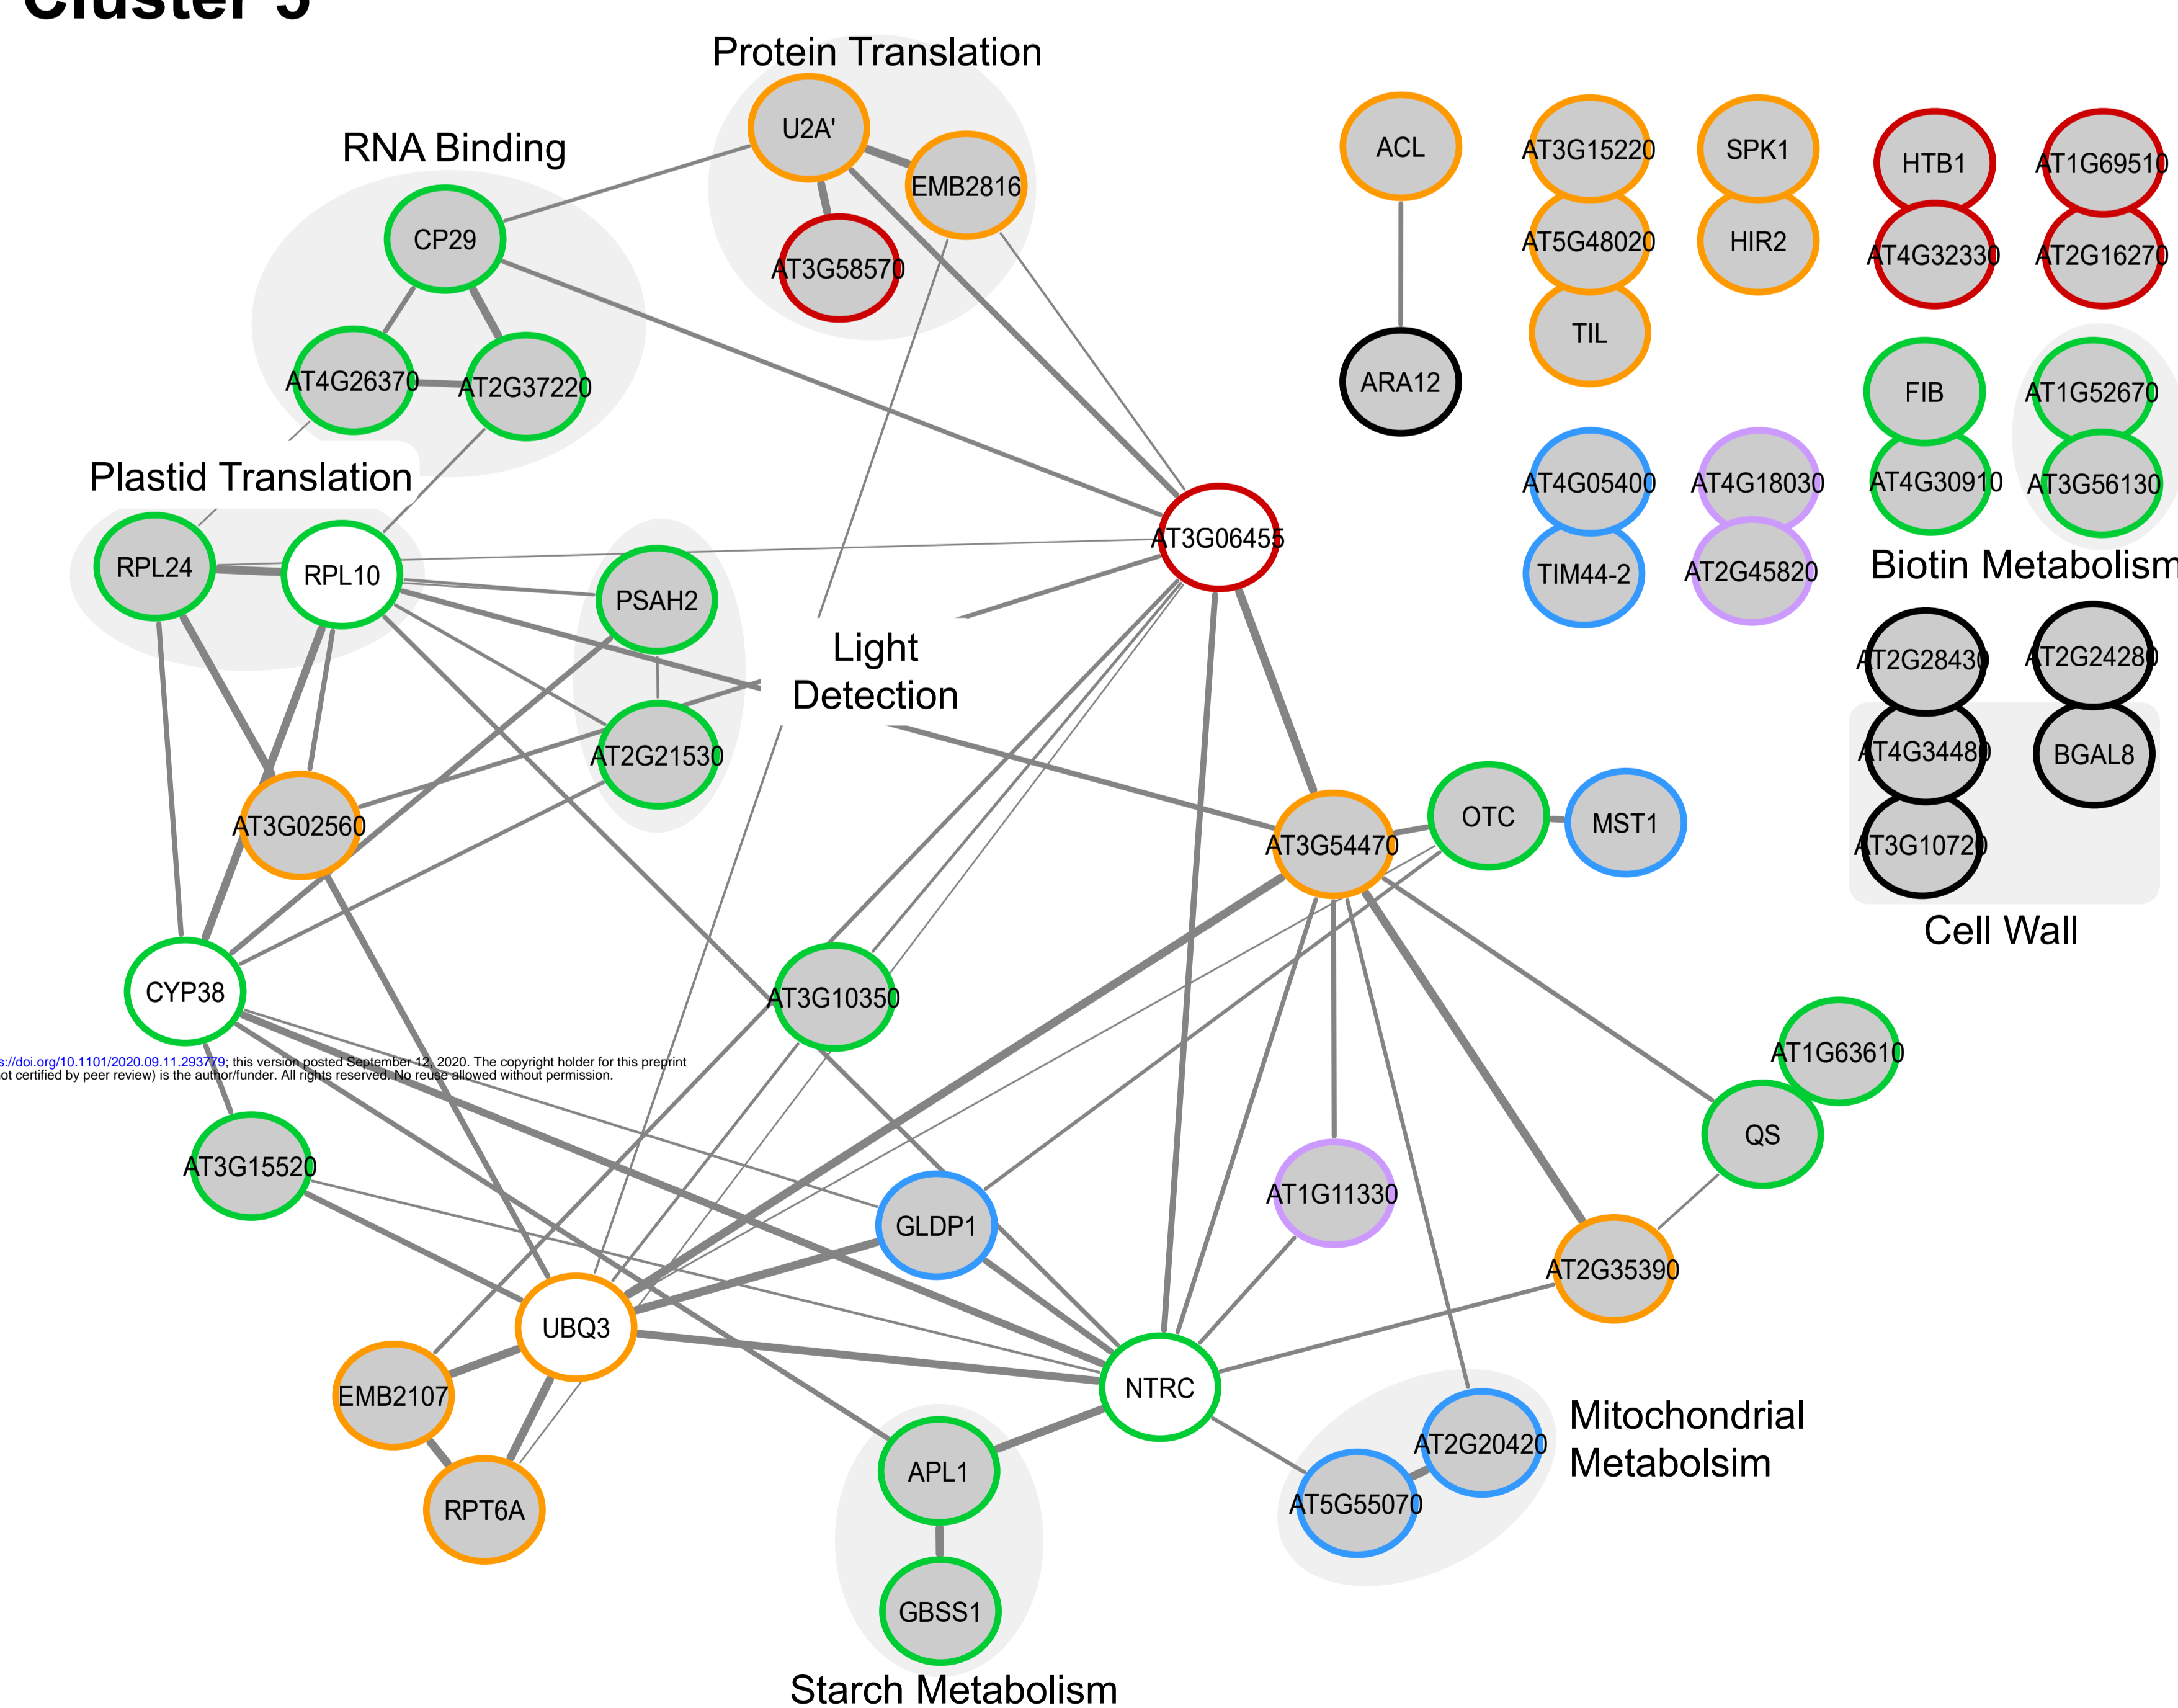

Cluster 6

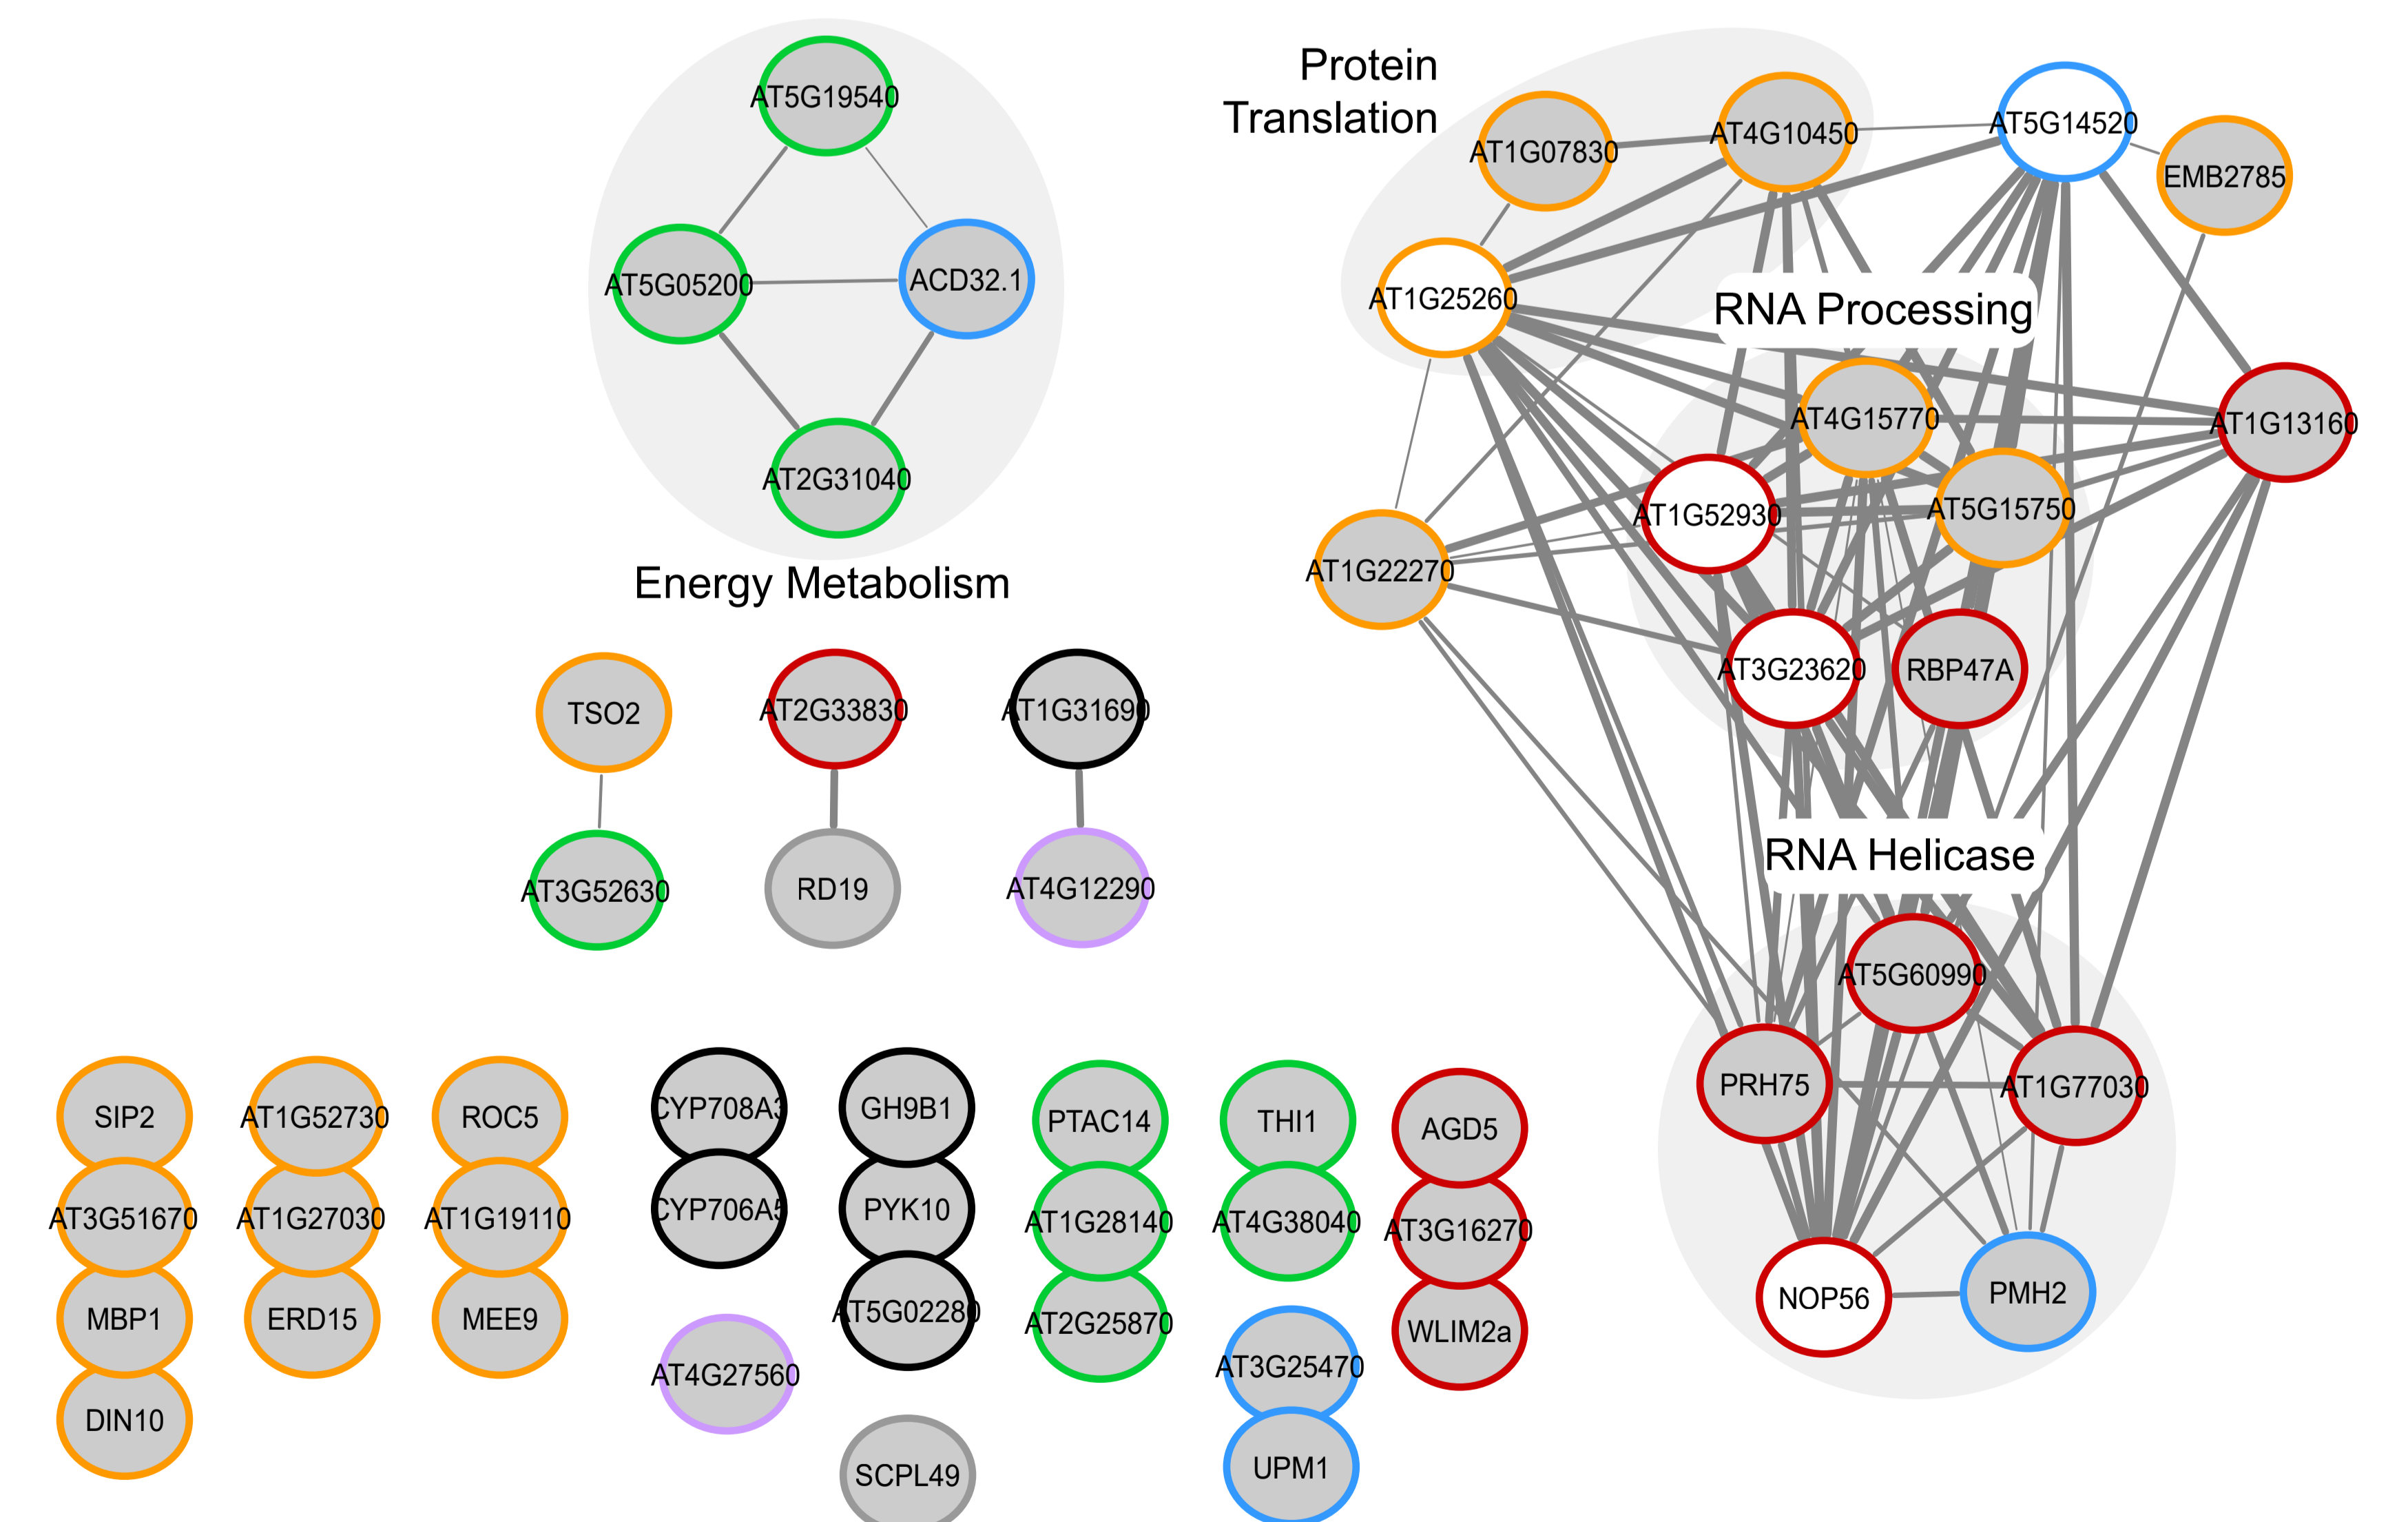

**Figure 2: Interaction networks of the diurnal proteome.** An association network analysis using STRING-DB (<https://string-db.org/>) of statistically significant diurnally changing proteins was performed using the generated unsupervised clusters shown in Figure 1. Edge thickness indicates confidence of the connection between two nodes (0.5 - 1.0). Changing proteins (grey circles) are labeled by either their primary gene annotation or Arabidopsis gene identifier (AGI). The colored outline of each node represents the in silico predicted subcellular localization of this protein (SUBAcon; [suba3.plantenergy.uwa.edu.au](http://suba3.plantenergy.uwa.edu.au)). Nucleus (red), cytosol (orange), plastid (green), mitochondria (blue), plasma membrane (purple), peroxisome (dark yellow), endoplasmic reticulum/golgi/secreted (black) are depicted. A second layer of STRING-DB identified proteins (white nodes) not found in each respective significantly changing protein cluster was used to highlight the interconnectedness of proteins in the cluster. Multiple nodes encompassed by a labelled grey circle represent proteins involved in the same cellular process.

Figure 3

bioRxiv preprint doi: <https://doi.org/10.1101/2020.09.11.293779>; this version posted September 12, 2020. The copyright holder for this preprint (which was not certified by peer review) is the author/funder. All rights reserved. No reuse allowed without permission.

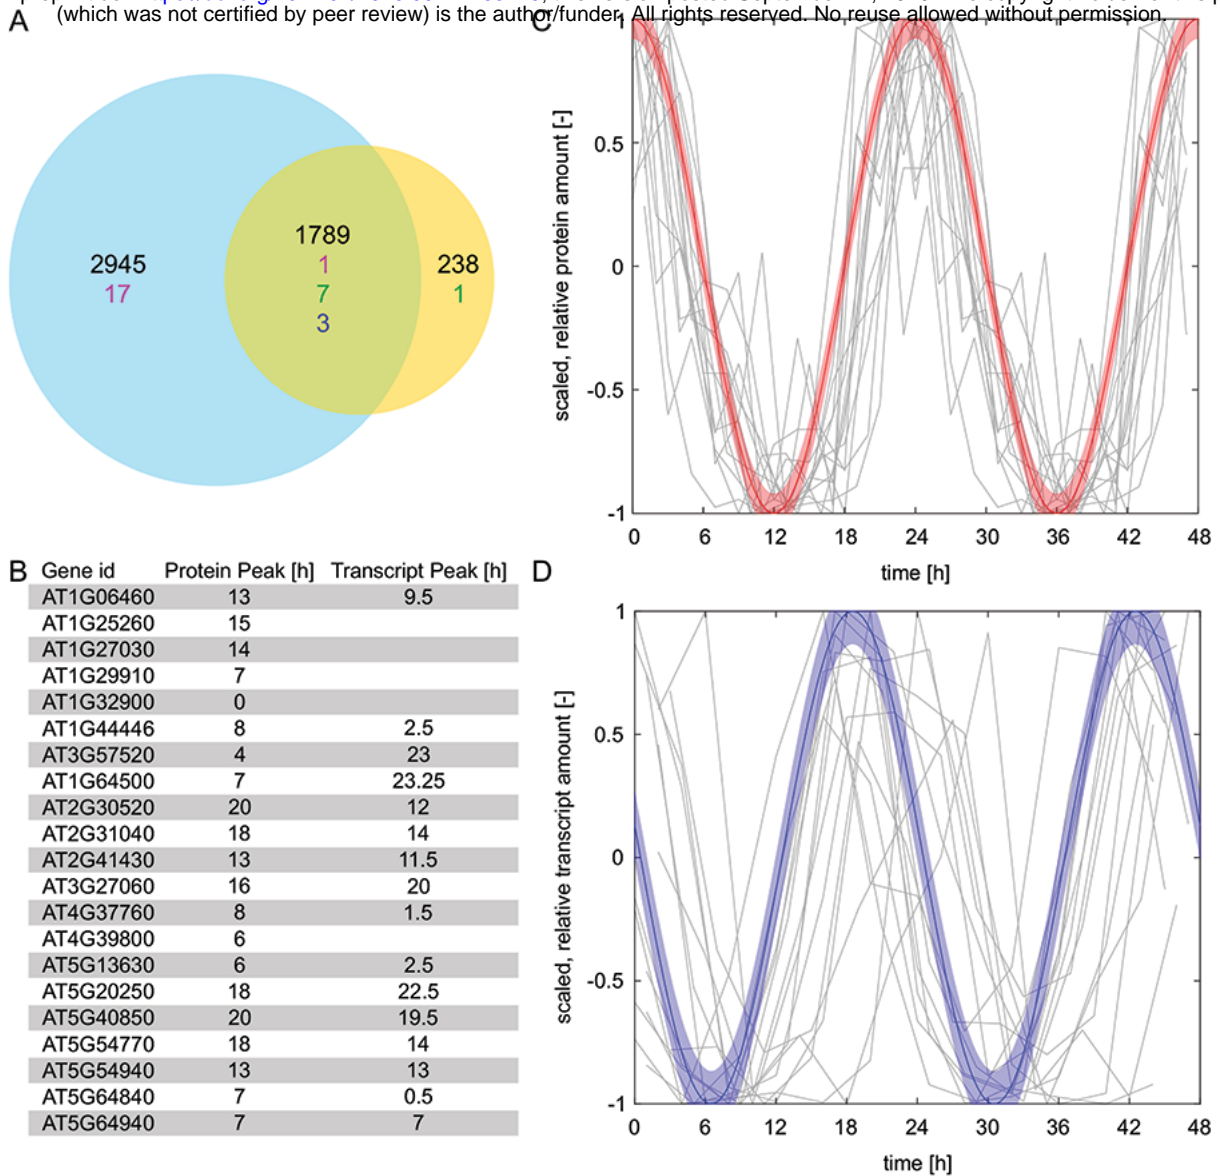

**Figure 3: Comparative analysis of diurnal proteome to free-running circadian proteome (Krahmer et al., 2019).** (A) Number of proteins measured in this study (blue circle) and Krahmer et al. (2019) (orange circle). Number of stable proteins (black), fluctuating proteins in our study only (magenta), Krahmer et al. (2019) only (green) and both studies (blue). (B) Table of 21 proteins that show significant (B.Q) fluctuation using JTK with their respective peak time period for protein and transcript levels (Diurnal DB, <http://diurnal.mocklerlab.org/>). (C and D) Normalized (Median = 0, Amplitude of 2) protein levels of 15 proteins both fluctuating in protein and transcript levels (gray lines) shifted to peak at time zero for protein levels in (C) and transcript levels in (D). Protein data was plotted twice to visualize a 48 h timeframe. The theoretical cosine functions with associated 99% confidence interval for protein levels (C, red) and transcript levels (D, blue) are shifted by 5.5 h.

Figure 4

(A) Dark-to-Light (D-L)

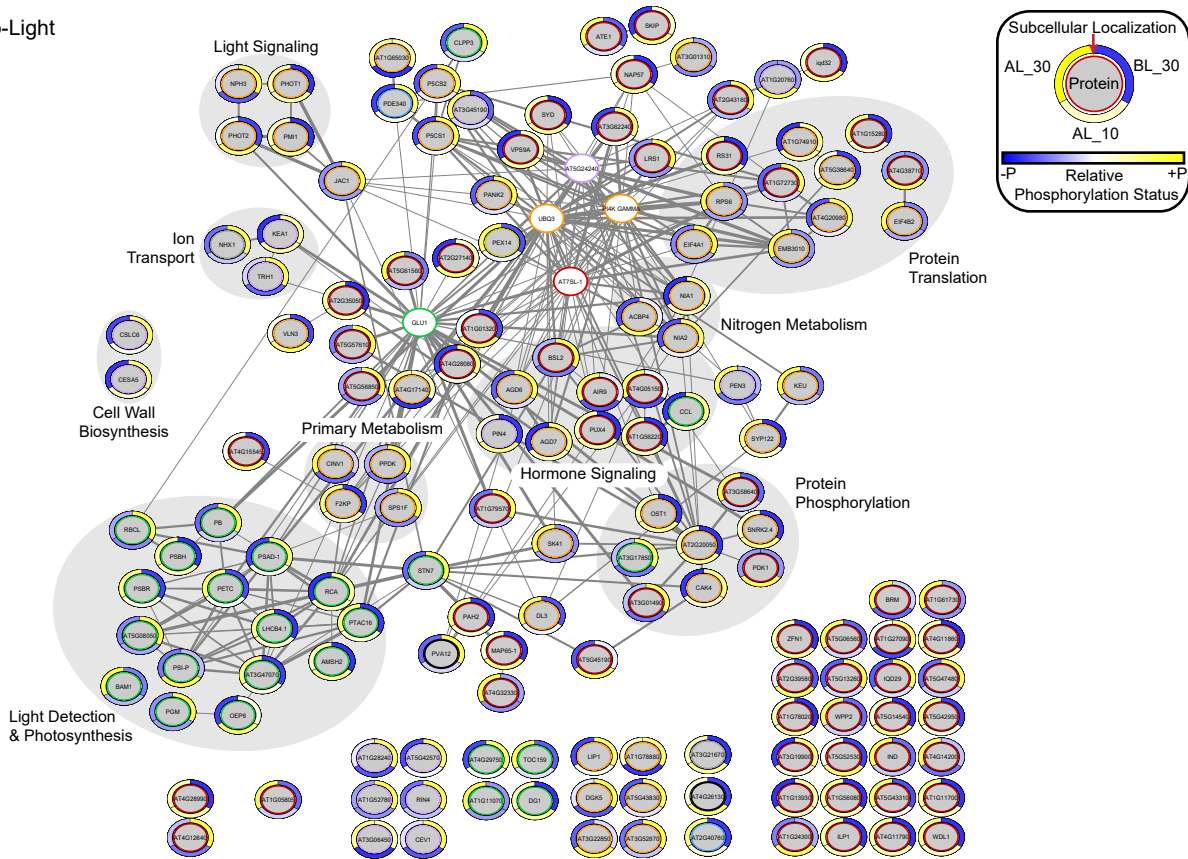

(B) Light-to-Dark (L-D)

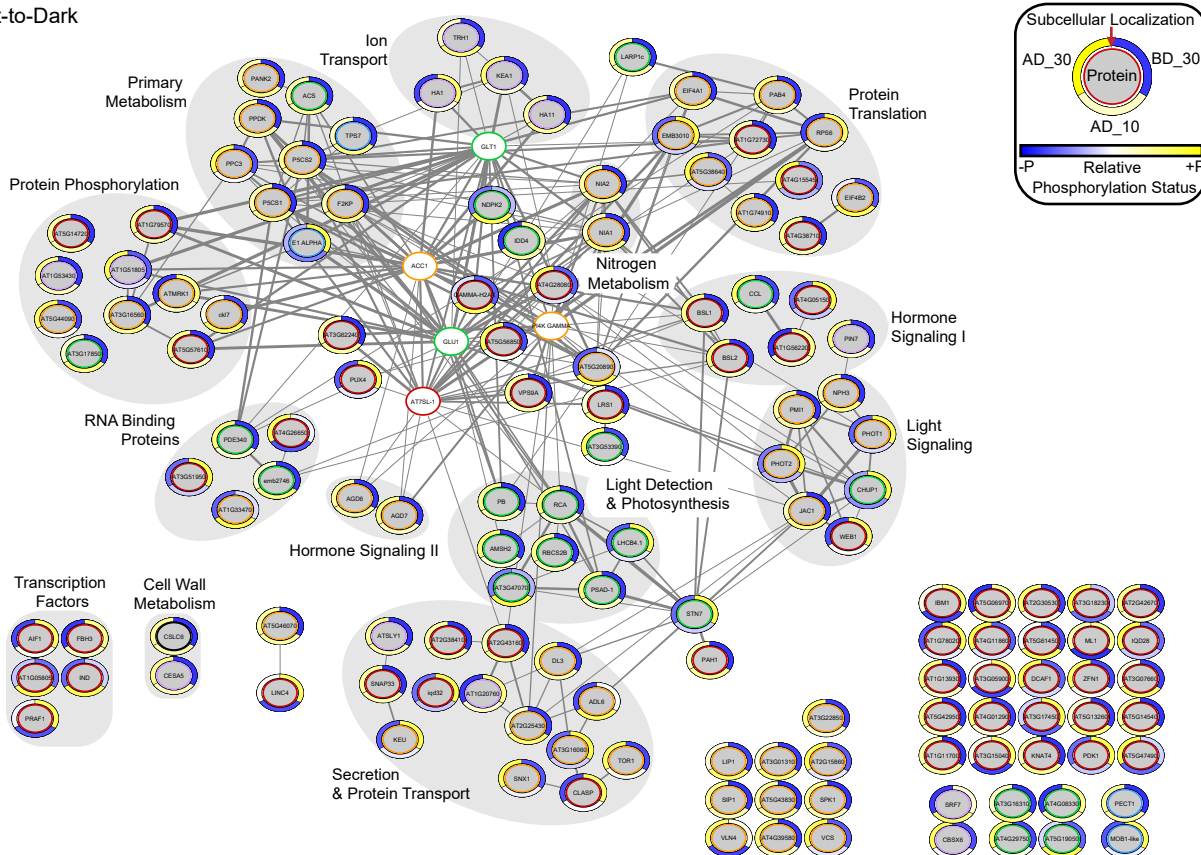

**Figure 4: Interaction networks of the diurnal phosphoproteome at the D-L and L-D transitions.** An association network analysis of statistically significant diurnally changing phosphorylated proteins was performed using the STRING-DB (ANOVA P value  $\leq 0.05$ ). Edge thickness indicates strength of the connection between two nodes (0.5 - 1.0). Phosphorylated proteins (grey circles) are labeled by either their primary gene annotation or Arabidopsis gene identifier (AGI). Outer circle around each node depicts the standardized relative log<sub>2</sub> FC in phosphorylation status of this protein between time-points. The sliding scale of yellow to blue represents a relative increase and decrease in phosphorylation, respectively. The inner colored circles represent in silico predicted subcellular localization (SUBAcon; suba3.plantenergy.uwa.edu.au). Nucleus (red), cytosol (orange), plastid (green), mitochondria (blue), plasma membrane (purple), peroxisome (dark yellow), endoplasmic reticulum/golgi/secreted (black) are depicted. A second shell of 5 STRING-DB proteins (white circles) not found in our dataset was used to highlight the interconnectedness of the network. Multiple nodes encompassed by a labelled grey circle represent proteins involved in the same cellular process.

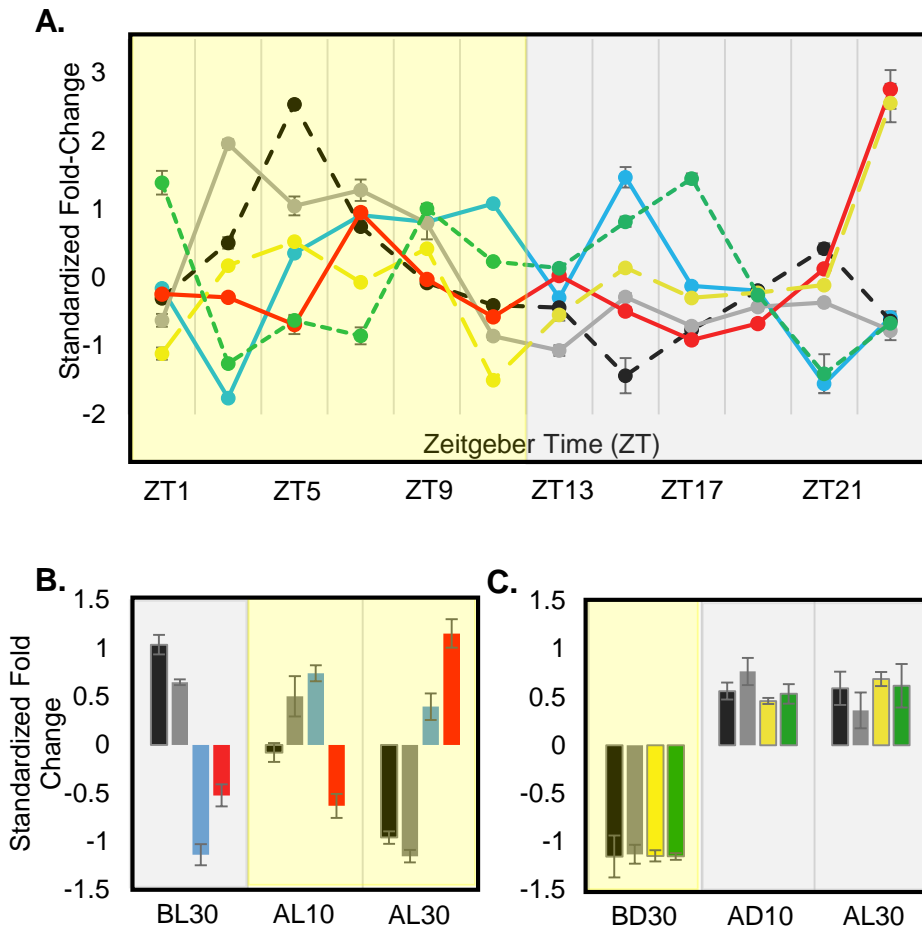

**Figure 5: Proteins exhibiting a significant change in both diurnal protein abundance and protein phosphorylation status.** Six proteins were found to significantly change in protein abundance and protein phosphorylation: AT1G10940 (SnRK2.4; blue), AT1G37130 (NIA2; black), AT1G77760 (NIA1; grey), AT4G32330 (TPX2; red), AT4G16340 (SPK1; yellow), AT4G35890 (LARP1c; green). (A) Diurnal protein abundance change profile. Standardized fold-change values are plotted relative to ZT. (B) D-L and (C) L-D phosphorylation change profiles. Standardized fold-change values are plotted relative to transition time-point either 10 or 30 minutes before light (BL), after light (AL), before dark (BD) or after dark (AD). Standard error bars are shown.

Figure 6

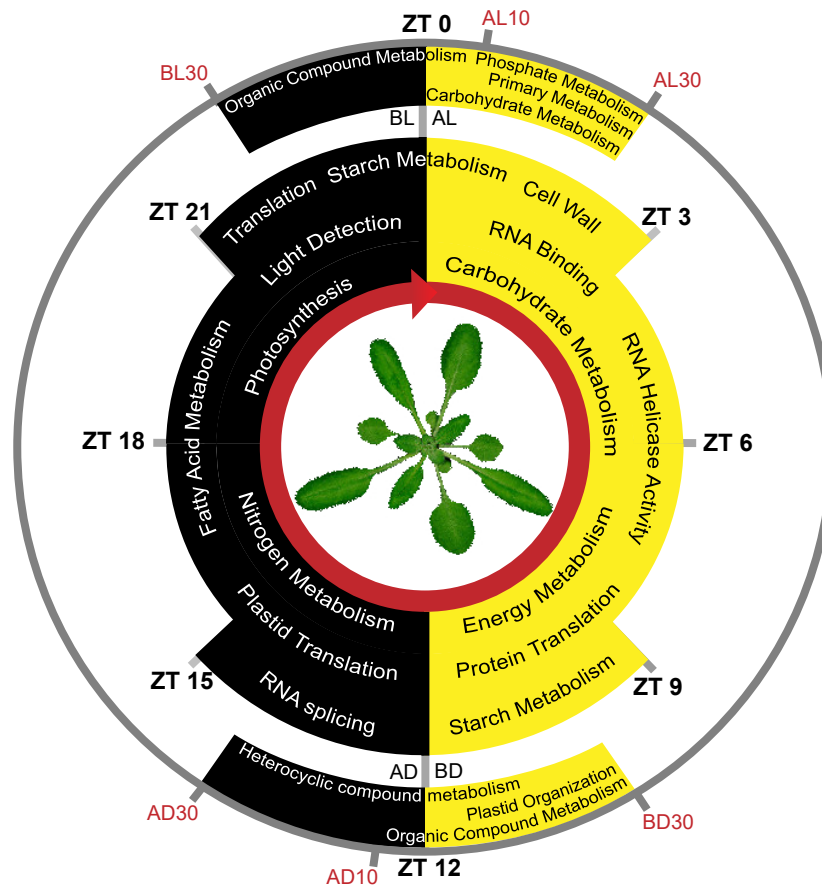

**Figure 6: Schematic representation of Arabidopsis cellular and biological processes affected by diurnal fluctuations in protein abundance or protein phosphorylation.** The inner three circles show terms of processes involving proteins with a maximal change in abundance during the day (yellow) or night (black). The outer circle show terms of processes involving proteins with changes in protein phosphorylation at the dark-to-light (D-L) transition (top) or light-to-dark (L-D) transition (bottom). The segments of each inner circle relative to ZT0 (day) or ZT12 (night) represent the approximate time interval in which proteins (ZT) and phosphoproteins (30 min before light or dark, 10 and 30 min after light or dark) involved in each process have their maximal change. The cellular and biological terms shown here were obtained by GO term enrichment of each protein and phosphoprotein cluster as outlined in Materials and Methods.
